# Supplementary material for: Detection of critical cerebral desaturation thresholds by three regional oximeters during hypoxia: a pilot study in healthy volunteers
Source: BMC Anesthesiol. 2017 Jan 13;17:6. doi: 10.1186/s12871-016-0298-7 (PMC5234256; doi:10.1186/s12871-016-0298-7)
Supplement: Additional file 2: — Raw data subject #1228. (XLSX 123 kb) [file 12871_2016_298_MOESM2_ESM.xlsx]

## Sheet: Sheet1
Time in sec	Ch1 SpO2	Ch2 SpO2	Ch1 PR	Ch2 PR	ECG HR	Invos_rSO2	equanox_rSO2	foresight_rSO2
1	93.17	93.94	73	73	72
2	93.19	93.95	73	73	72
3	93.22	94	73	73	72
4	93.23	94.03	73	73	73
5	93.23	94.05	73	73	73
6	93.26	94.11	72	72	72
7	93.3	94.19	72	72	72	66		71
8	93.34	94.26	71	70	72	66		71
9	93.39	94.33	70	71	71	66		71
10	93.43	94.35	70	70	69	66		71
11	93.47	94.36	69	69	67	66		71
12	93.5	94.38	69	69	67	67		71
13	93.54	94.41	69	69	67	67		71
14	93.56	94.4	69	69	67	67		71
15	93.52	94.34	69	69	67	67		72
16	93.45	94.24	69	69	67	67		72
17	93.38	94.19	68	68	67	67		72
18	93.33	94.09	68	68	67	67		72
19	93.26	94.03	68	68	67	67		72
20	93.22	93.99	67	67	67	67		72
21	93.18	93.95	67	67	67	66		73
22	93.17	93.93	67	67	67	66		73
23	93.17	93.93	67	67	67	66		73
24	93.2	93.96	67	67	67	66		73
25	93.22	93.96	67	67	67	66		72
26	93.21	94	67	67	67	66		72
27	93.24	94.02	66	66	66	66		71
28	93.28	94	66	66	66	66		71
29	93.26	93.99	66	66	66	66		71
30	93.25	93.98	66	66	66	66		71
31	93.24	93.95	66	66	66	66		71
32	93.21	93.91	67	67	66	66		71
33	93.21	93.91	67	67	67	66		71
34	93.22	93.93	67	67	67	66		71
35	93.23	93.94	66	66	66	66		72
36	93.24	94	66	66	66	67		72
37	93.27	94.05	67	67	66	67		71
38	93.27	94.08	68	68	66	67		71
39	93.28	94.09	68	68	67	67		72
40	93.27	94.07	68	68	67	67		72
41	93.26	94.06	68	68	68	67		71
42	93.24	94.06	69	69	70	67		71
43	93.27	94.06	68	68	71	67		71
44	93.27	94.06	69	69	71	67		71
45	93.28	94.07	69	69	70	67		71
46	93.31	94.08	69	69	70	67		71
47	93.35	94.11	68	68	70	67		71
48	93.36	94.11	68	68	69	67		71
49	93.37	94.07	68	68	67	67		71
50	93.33	94.06	67	67	66	67		71
51	93.33	94.01	67	67	66	66		71
52	93.29	93.96	67	67	66	66		71
53	93.24	93.91	67	67	66	66		71
54	93.2	93.87	67	67	66	66		71
55	93.16	93.84	67	67	66	66		71
56	93.14	93.82	66	66	66	66		71
57	93.14	93.82	67	67	66	66		71
58	93.14	93.81	67	67	66	66		71
59	93.15	93.87	67	67	66	66		72
60	93.21	93.9	67	67	67	68		72
61	93.23	93.92	67	67	68	68		72
62	93.24	93.93	69	69	67	68		72
63	93.27	93.95	70	70	67	68		72
64	93.3	93.98	69	69	66	68		72
65	93.31	94.01	69	68	65	68		72
66	93.36	94.02	68	68	65	68		72
67	93.35	94.02	68	68	65	68		72
68	93.35	94.03	68	68	65	68		72
69	93.35	94.07	67	67	66	68		72
70	93.39	94.18	67	67	66	66		72
71	93.45	94.32	67	67	66	66		72
72	93.52	94.43	67	67	66	66		72
73	93.6	94.53	67	67	66	66		71
74	93.68	94.61	67	67	67	66		71
75	93.75	94.69	68	68	67	66
76	93.79	94.72	69	69	68	66
77	93.86	94.81	69	69	70	66
78	93.98	94.94	69	69	71	66
79	94.08	95.03	69	70	72	66
80	94.15	95.1	70	70	72	68
81	94.22	95.15	70	70	72	68
82	94.27	95.17	70	70	72	68
83	94.28	95.15	70	70	72	68
84	94.28	95.12	69	69	72	68
85	94.25	95.02	69	69	71	68
86	94.15	94.93	69	69	71	68
87	94.09	94.81	69	69	70	68
88	93.98	94.7	69	69	68	68
89	93.89	94.63	69	69	68	67
90	93.83	94.59	69	69	68	67
91	93.82	94.58	71	71	69	67
92	93.82	94.63	72	72	69	67
93	93.85	94.66	73	73	70	67
94	93.87	94.68	75	75	72	68
95	93.92	94.72	75	75	76	68
96	93.97	94.77	75	75	77	68
97	94	94.79	75	75	77	68
98	94.04	94.8	74	74	77	68
99	94.07	94.88	74	74	77	68
100	94.12	94.95	73	73	76	68
101	94.16	95.01	72	73	75	68
102	94.18	95.04	73	73	73	68
103	94.2	95.05	73	73	71	68
104	94.19	95.05	72	72	71	67
105	94.21	94.99	72	72	71	67
106	94.19	94.97	72	72	71	67
107	94.19	94.94	72	72	71	67
108	94.18	94.91	72	72	72	67
109	94.17	94.9	72	72	73	67
110	94.21	94.87	73	73	74	67
111	94.21	94.86	73	73	75	67
112	94.22	94.86	74	74	76	67
113	94.19	94.8	75	74	76	67
114	94.17	94.76	75	74	76	68
115	94.15	94.73	75	75	76	68
116	94.13	94.69	75	75	76	68
117	94.11	94.68	75	75	76	68
118	94.09	94.66	74	74	76	68
119	94.08	94.63	74	74	76	67
120	94.08	94.61	74	74	76	67
121	94.08	94.59	73	73	75	67
122	94.08	94.59	73	73	73	67
123	94.07	94.59	72	72	69	66
124	94.08	94.59	72	72	69	66
125	94.08	94.6	72	72	69	66
126	94.1	94.61	72	72	70	66
127	94.12	94.63	72	72	70	66
128	94.15	94.61	73	73	71	65
129	94.15	94.61	72	72	73	65
130	94.14	94.59	72	72	74	65
131	94.12	94.55	74	74	76	65
132	94.07	94.52	74	74	77	65
133	94.05	94.5	75	75	78	65
134	94.04	94.47	75	75	78	65
135	94.04	94.46	75	75	78	65
136	94.03	94.46	74	74	78	65
137	94.05	94.48	73	73	77	65
138	94.08	94.51	73	73	76	65
139	94.11	94.54	73	73	74	65
140	94.13	94.68	73	72	70	65
141	94.19	94.68	71	71	69	65
142	94.18	94.68	71	71	68	65
143	94.19	94.68	70	70	67	65
144	94.19	94.67	69	70	67	65
145	94.18	94.64	69	69	66	65
146	94.14	94.58	69	69	66	65
147	94.09	94.51	69	69	65	65
148	94.04	94.46	68	68	65	63
149	94.01	94.46	67	67	65	63
150	93.99	94.54	67	67	65	63		70
151	94.06	94.6	67	67	65	63		70
152	94.1	94.66	66	66	65	64		69
153	94.13	94.69	66	66	65	64		69
154	94.16	94.71	66	66	65	64		69
155	94.19	94.73	65	65	65	64		69
156	94.22	94.73	65	65	65	64		70
157	94.22	94.7	66	66	65	65		70
158	94.2	94.68	66	66	64	65		71
159	94.19	94.66	65	65	64	65		71
160	94.18	94.64	65	65	64	65		71
161	94.16	94.61	65	65	64	65		71
162	94.13	94.6	66	66	64	65		71
163	94.14	94.57	66	65	65	65		71
164	94.12	94.57	66	66	66	65		70
165	94.09	94.57	66	66	67	65		70
166	94.09	94.59	66	66	67	65		71
167	94.1	94.62	65	65	67	64		71
168	94.11	94.63	65	65	67	64		71
169	94.12	94.65	65	65	66	64		71
170	94.13	94.66	64	64	65	64		70
171	94.13	94.67	64	64	63	64		70
172	94.13	94.66	64	64	63	63		70
173	94.11	94.62	64	64	63	63		70
174	94.08	94.58	64	64	63	63		70
175	94.04	94.56	65	65	63	63		70
176	94.04	94.59	65	65	63	63		69
177	94.06	94.62	65	65	64	64		69
178	94.05	94.64	66	66	65	64		70
179	94.08	94.65	65	65	66	64		70
180	94.11	94.66	65	65	66	64		70
181	94.15	94.68	64	64	66	64		70
182	94.16	94.68	64	65	65	65		70
183	94.18	94.7	65	65	65	65		70
184	94.21	94.71	64	64	64	65		69
185	94.22	94.7	64	64	64	65		69
186	94.2	94.66	64	64	64	64		70
187	94.16	94.62	64	64	64	64		70
188	94.13	94.56	64	64	64	64		70
189	94.08	94.52	64	65	64	64		70
190	94.06	94.46	65	65	64	64		70
191	94.06	94.41	65	65	65	64		70
192	93.99	94.36	65	65	66	64		70
193	93.95	94.3	65	65	66	64		70
194	93.92	94.25	65	65	66	64		71
195	93.88	94.2	65	65	65	64		71
196	93.83	94.14	65	65	65	64		70
197	93.79	94.12	65	65	65	64		70
198	93.76	94.06	65	65	65	64		70
199	93.7	94.01	65	66	65	64		70
200	93.66	94.02	66	66	65	64		71
201	93.65	94.03	66	66	66	65		71
202	93.66	94.06	66	66	66	65		71
203	93.68	94.11	66	66	67	65		71
204	93.71	94.15	67	66	67	65		71
205	93.74	94.18	66	67	67	65		71
206	93.77	94.21	67	66	67	64		70
207	93.77	94.19	67	67	67	64		70
208	93.75	94.2	67	67	67	64		70
209	93.76	94.19	67	67	67	64		70
210	93.77	94.19	68	68	68	64		70
211	93.76	94.16	68	68	69	64		70
212	93.75	94.14	68	68	69	64		71
213	93.75	94.11	68	68	69	64		71
214	93.71	94.07	68	69	69	64		70
215	93.71	94.01	68	68	69	64		70
216	93.65	93.95	68	68	69	65		70
217	93.6	93.88	69	69	69	65		70
218	93.57	93.85	69	69	69	65		71
219	93.53	93.78	70	70	70	65		71
220	93.47	93.75	70	70	71	0		71
221	93.45	93.75	70	70	71	0		71
222	93.44	93.78	70	69	70	0		71
223	93.46	93.78	69	69	70	0		71
224	93.49	93.9	68	68	70	0		71
225	93.56	93.98	68	68	69	0		71
226	93.6	94.05	68	68	67	0		71
227	93.67	94.11	68	68	66	0		71
228	93.72	94.17	68	68	66	0		71
229	93.8	94.18	68	68	66	0		71
230	93.83	94.2	68	68	66	0		71
231	93.86	94.21	68	68	67	0		71
232	93.86	94.19	68	68	68	0		71
233	93.85	94.18	69	69	69	0		71
234	93.83	94.15	69	69	69	0		71
235	93.81	94.15	69	69	69	0		71
236	93.79	94.12	69	69	69	0		71
237	93.78	94.1	69	69	70	0		71
238	93.75	94.06	69	69	70	0		71
239	93.73	94.05	70	69	70	0		71
240	93.72	94.05	69	69	70	0		71
241	93.71	94.08	69	70	70	0		71
242	93.71	94.06	69	69	69	0		71
243	93.71	94.07	69	69	69	0		71
244	93.72	94.08	69	69	68	0		71
245	93.73	94.09	69	69	68	0		71
246	93.74	94.09	69	69	68	0		70
247	93.73	94.1	70	70	68	0		70
248	93.74	94.1	71	70	69	0		70
249	93.74	94.11	70	70	70	0		70
250	93.74	94.12	70	70	72	0		70
251	93.74	94.13	70	70	72	0		70
252	93.75	94.13	70	70	72	0		70
253	93.75	94.13	70	70	72	0		70
254	93.75	94.11	70	70	71	0		70
255	93.74	94.09	71	71	71	0		70
256	93.73	94.06	72	73	71	0		70
257	93.7	94.03	73	73	71	0		70
258	93.68	94.03	73	73	72	0		71
259	93.68	94.04	72	73	73	0		71
260	93.68	94.06	72	72	73	0		71
261	93.68	94.1	73	72	73	0		71
262	93.72	94.15	72	71	73	0		71
263	93.78	94.16	71	71	72	0		71
264	93.77	94.17	70	70	71	0		71
265	93.8	94.18	70	70	69	0		71
266	93.79	94.14	70	70	69	0		71
267	93.74	94.07	70	70	69	0		71
268	93.68	93.99	70	70	69	0		71
269	93.59	93.91	71	71	69	0		71
270	93.56	93.89	70	70	69	0		71
271	93.56	93.91	70	70	69	0		71
272	93.58	93.94	70	70	70	0		71
273	93.61	94	70	70	70	0		71
274	93.69	94.07	69	69	70	0		71
275	93.75	94.12	69	69	69	0		71
276	93.81	94.2	69	69	69	0		71
277	93.87	94.21	69	69	68	0		71
278	93.89	94.24	69	69	68	0		71
279	93.9	94.26	69	69	68	0		71
280	93.9	94.3	69	69	68	0		71
281	93.95	94.36	68	68	68	0		71
282	93.99	94.39	68	68	68	0		71
283	94.01	94.44	68	68	68	0		71
284	94.06	94.43	68	68	68	0		71
285	94.06	94.41	68	68	68	0		71
286	94.05	94.39	68	68	67	0		71
287	94.03	94.34	68	68	67	64		71
288	93.98	94.31	68	68	68	64		71
289	93.94	94.24	68	68	68	64		71
290	93.89	94.15	68	68	68	64		71
291	93.83	94.12	69	69	69	64		71
292	93.79	94.11	69	69	69	64		71
293	93.78	94.12	68	68	69	64		71
294	93.78	94.13	69	69	69	64		71
295	93.78	94.13	69	69	69	64		71
296	93.79	94.1	69	70	69	65		71
297	93.79	94.1	71	71	69	65		71
298	93.78	94.11	71	71	69	65		71
299	93.79	94.12	71	71	69	65		71
300	93.79	94.1	71	72	70	65		71
301	93.76	94.05	73	73	72	64		71
302	93.79	94.12	73	73	76	64		71
303	93.84	94.19	73	74	78	64		71
304	93.86	94.25	74	74	78	64		71
305	93.9	94.26	74	74	78	64		71
306	93.91	94.27	74	74	77	64		71
307	93.95	94.31	74	75	77	64		71
308	94	94.45	74	73	76	64		71
309	94.06	94.49	74	74	74	64		71
310	94.06	94.63	74	74	74	64		71
311	94.11	94.71	74	74	74	64		71
312	94.14	94.71	74	74	74	64		70
313	94.18	94.72	73	74	74	64		70
314	94.22	94.82	72	71	74	64		70
315	94.26	94.87	70	70	73	64		70
316	94.29	94.95	69	69	72	63		69
317	94.31	95.03	69	69	70	63		69
318	94.33	95.13	69	69	66	63		70
319	94.37	95.25	69	69	67	63		70
320	94.43	95.35	69	69	67	63		70
321	94.49	95.42	71	71	66	63		70
322	94.56	95.51	71	71	66	63		71
323	94.64	95.58	69	70	65	63		71
324	94.74	95.47	69	69	62	63		71
325	94.8	95.43	69	69	63	63		71
326	94.82	95.39	69	69	63	63		71
327	94.88	95.39	69	69	64	63		71
328	94.89	95.41	68	68	67	63		70
329	94.87	95.65	68	68	67	63		70
330	95.03	95.85	68	67	67	62		70
331	95.13	96	67	67	67	62		70
332	95.12	96.03	67	67	66	62		70
333	95.13	96.04	58	68	66	62		70
334	95.45	96.29	59	68	66	62		70
335	95.49	96.47	61	68	66	61		70
336	95.52	96.56	62	68	66	61		69
337	95.45	96.61	63	68	67	61		69
338	95.62	96.66	64	68	68	61		69
339	95.71	96.66	65	68	69	61		69
340	95.7	96.63	66	69	70	62		68
341	95.63	96.64	66	70	72	62		68
342	95.6	96.64	67	70	73	62		68
343	95.7	96.69	68	70	73	62		68
344	95.76	96.96	68	70	73	62		69
345	95.8	97.03	69	70	73	64		69
346	95.83	97.06	68	70	72	64		69
347	95.84	97.06	68	69	71	64		69
348	95.85	97.06	68	69	69	64		69
349	95.82	97.01	68	69	66	64		69
350	95.78	96.98	69	69	66	64		69
351	95.75	96.92	70	70	66	64		69
352	95.72	96.92	70	70	67	64		69
353	95.7	96.88	70	70	67	64		69
354	95.7	96.87	69	70	68	63		71
355	95.72	96.89	69	69	69	63		71
356	95.76	96.89	69	69	69	63		71
357	95.75	96.91	68	68	69	63		71
358	95.73	96.85	69	69	69	63		71
359	95.7	96.81	69	69	68	63		71
360	95.68	96.76	68	68	68	63		71
361	95.64	96.68	67	67	68	63		71
362	95.57	96.68	67	67	68	63		71
363	95.5	96.41	68	68	68	63		71
364	95.41	96.33	68	67	67	63		71
365	95.33	96.24	67	67	66	63		71
366	95.23	96.24	68	67	66	63		71
367	95.15	96.09	68	68	67	63		71
368	95.05	96.02	68	68	67	63		71
369	95.05	95.95	68	68	67	61		71
370	94.87	95.95	68	68	68	61		71
371	94.8	95.72	68	68	68	61		71
372	94.69	95.72	67	68	68	61		70
373	94.54	95.62	67	67	67	61		70
374	94.48	95.57	67	67	67	62		70
375	94.49	95.67	67	67	66	62		70
376	94.58	95.81	67	67	66	62		69
377	94.7	95.95	67	67	66	62		69
378	94.84	95.95	67	67	67	62		69
379	94.84	96.1	67	67	67	63		69
380	95.11	96.36	67	67	67	63		69
381	95.14	96.52	67	67	67	63		69
382	95.26	96.52	67	67	67	63		70
383	95.33	96.59	66	66	66	65		70
384	95.3	96.58	66	66	66	65		70
385	95.28	96.57	66	66	65	65		70
386	95.34	96.57	67	67	65	65		70
387	95.37	96.57	67	67	66	65		70
388	95.47	96.56	67	67	66	63		71
389	95.54	96.63	67	67	66	63		71
390	95.61	96.76	67	67	67	63		70
391	95.79	96.83	67	67	68	63		70
392	95.85	96.83	68	67	68	63		70
393	95.87	96.84	68	67	68	63		70
394	95.84	96.86	67	67	68	63		70
395	95.81	96.87	67	67	68	63		70
396	95.78	96.87	67	67	67	63		71
397	95.78	96.84	67	67	66	63		71
398	95.71	96.76	66	66	66	64		70
399	95.71	96.58	66	66	66	64		70
400	95.5	96.58	67	66	66	64		71
401	95.37	96.43	68	67	67	64		71
402	95.27	96.27	68	68	67	64		70
403	95.17	96.15	68	68	68	64		70
404	95.11	96.04	69	68	70	64		70
405	95.04	95.87	69	68	70	64		70
406	95.01	95.83	68	68	70	64		70
407	95.02	95.8	67	67	70	64		70
408	95.01	95.8	68	67	69	63		70
409	95.06	95.82	68	68	68	63		70
410	95.13	95.92	68	68	67	63		70
411	95.17	95.96	68	68	67	63		70
412	95.15	95.96	71	68	67	63		70
413	95.16	95.98	70	71	67	63		70
414	95.18	95.98	69	70	65	63		70
415	95.22	96.05	68	68	63	63		70
416	95.26	96.08	67	67	59	63		70
417	95.29	96.08	67	67	59	64		70
418	95.31	96.1	68	67	59	64		70
419	95.37	96.17	68	68	60	64		70
420	95.44	96.28	67	67	61	64		70
421	95.5	96.37	67	67	63	64		70
422	95.55	96.37	67	67	67	62		70
423	95.56	96.43	67	67	67	62		70
424	95.55	96.37	67	67	67	62		70
425	95.54	96.35	66	66	67	62		70
426	95.61	96.35	66	66	67	62		70
427	95.67	96.31	67	66	67	64		70
428	95.78	96.54	67	67	67	64		69
429	95.78	96.64	67	67	67	64		69
430	95.98	96.64	66	67	67	64		69
431	96.03	96.7	66	66	67	64		69
432	96.02	96.73	67	66	66	65		69
433	95.99	96.66	67	67	66	65		69
434	95.95	96.66	67	67	66	65		69
435	95.92	96.63	66	67	67	65		69
436	95.88	96.57	67	67	67	65		69
437	95.83	96.54	67	67	67	65		69
438	95.82	96.54	67	67	67	65		71
439	95.85	96.56	66	67	67	65		71
440	95.88	96.63	66	66	66	65		71
441	95.9	96.81	65	66	66	64		71
442	95.98	96.81	66	66	65	64		71
443	96.01	96.87	65	66	65	64		71
444	96.03	96.9	64	65	64	64		71
445	96.03	96.9	64	64	64	64		71
446	95.99	96.85	65	65	63	63		71
447	95.99	96.85	65	65	63	63		71
448	95.94	96.8	65	65	63	63		70
449	95.9	96.74	65	65	63	63		70
450	95.87	96.6	65	65	64	63		69
451	95.87	96.52	65	66	65	65		69
452	95.73	96.52	66	66	65	65		69
453	95.64	96.39	65	66	65	65		69
454	95.57	96.24	65	65	65	65		69
455	95.57	96.13	65	65	65	65		69
456	95.4	96.13	65	65	64	65		70
457	95.33	96.06	65	65	64	65		70
458	95.33	95.94	65	65	64	65		70
459	95.29	95.87	65	65	64	65		70
460	95.17	95.87	66	65	64	65		71
461	95.11	95.8	66	66	64	64		71
462	95.07	95.69	65	65	65	64		70
463	95.03	95.69	65	65	65	64		70
464	94.95	95.63	65	65	66	64		70
465	94.86	95.53	67	66	68	64		70
466	94.8	95.45	67	67	69	64		70
467	94.75	95.36	66	66	69	64		70
468	94.75	95.36	66	66	69	64		70
469	94.66	95.33	66	66	69	64		70
470	94.64	95.32	67	66	68	64		71
471	94.67	95.41	67	67	67	65		71
472	94.67	95.41	67	67	67	65		71
473	94.76	95.48	66	67	67	65		71
474	94.8	95.55	67	67	67	65		71
475	94.79	95.55	68	67	67	65		71
476	94.8	95.59	69	69	68	65		71
477	94.8	95.59	69	69	69	65		71
478	94.77	95.56	68	69	71	65		71
479	94.74	95.51	70	69	72	65		71
480	94.75	95.49	71	70	72	65		71
481	94.75	95.51	71	70	73	65		71
482	94.79	95.51	70	70	73	65		71
483	94.8	95.51	69	70	73	65		71
484	94.79	95.5	70	69	73	65		71
485	94.79	95.52	70	70	73	64		71
486	94.79	95.56	72	71	73	64		71
487	94.8	95.61	71	72	73	64		71
488	94.8	95.61	71	71	73	64		71
489	94.79	95.51	71	70	73	64		71
490	94.72	95.51	70	70	73	64		71
491	94.72	95.51	71	70	72	64		71
492	94.79	95.57	71	71	72	64		71
493	94.79	95.57	71	71	72	64		71
494	94.84	95.62	70	71	72	64		71
495	94.85	95.63	69	70	72	64		71
496	94.86	95.62	70	70	72	64		71
497	94.86	95.58	70	70	72	64		71
498	94.84	95.58	70	70	71	64		71
499	94.88	95.6	68	69	70	64		71
500	94.87	95.61	68	68	68	63		71
501	94.86	95.57	69	68	66	63		71
502	94.86	95.51	69	69	67	63		71
503	94.96	95.5	69	69	67	63		71
504	94.95	95.6	69	69	67	63		71
505	94.94	95.62	70	69	67	63		71
506	94.94	95.66	70	70	68	63		71
507	94.95	95.71	70	70	70	63		71
508	95.02	95.74	70	70	73	63		71
509	95.08	95.78	71	70	73	63		71
510	95.08	95.77	71	71	73	63		71
511	95.07	95.79	70	69	73	63		71
512	95.12	95.79	69	69	72	63		70
513	95.12	95.81	68	69	71	63		70
514	95.12	95.82	68	68	69	62		70
515	95.11	95.81	69	69	69	62		70
516	95.09	95.81	70	70	69	62		70
517	95.07	95.77	70	70	69	62		70
518	95.07	95.78	70	70	69	62		70
519	95.07	95.78	71	71	70	62		70
520	95.05	95.78	70	70	70	62		70
521	95.05	95.74	70	70	70	62		70
522	95.05	95.73	70	70	70	62		70
523	95.03	95.74	70	70	70	62		70
524	95.06	95.75	67	68	70	61		70
525	95.06	95.76	66	67	69	61		70
526	95.08	95.74	66	66	68	61		70
527	95.08	95.72	66	66	66	61		70
528	95.06	95.71	67	67	66	61		70
529	95.06	95.71	65	67	66	61		70
530	95.02	95.65	64	65	66	61		70
531	95.02	95.54	64	64	66	61		70
532	94.97	95.23	64	64	65	61		70
533	94.9	95.23	64	64	64	61		70
534	94.9	95.26	63	64	62	61		70
535	94.9	95.32	63	63	62	61		70
536	94.9	95.35	63	63	62	61		70
537	94.89	95.38	63	63	62	61		70
538	94.76	95.31	64	64	62	61		70
539	94.7	95.24	63	64	62	61		70
540	94.67	95.23	63	63	63	61		70
541	94.67	95.22	63	64	64	61		70
542	94.7	95.29	64	64	65	61		70
543	94.71	95.32	64	64	65	62		70
544	94.71	95.3	64	64	65	62		70
545	94.74	95.32	64	64	65	62		70
546	94.76	95.35	64	64	65	62		69
547	94.78	95.37	65	64	65	62		69
548	94.78	95.42	65	65	65	62		69
549	94.81	95.44	65	65	65	62		69
550	94.86	95.45	64	64	65	62		70
551	94.87	95.46	64	64	65	62		70
552	94.87	95.45	64	64	65	62		70
553	94.9	95.49	64	64	64	61		70
554	94.96	95.58	63	63	63	61		69
555	95.03	95.64	64	63	63	61		69
556	95.1	95.73	64	64	64	61		70
557	95.1	95.71	64	64	64	61		70
558	95.1	95.72	64	64	64	61		69
559	95.1	95.73	63	63	64	61		69
560	95.06	95.71	65	64	64	61		69
561	95.06	95.67	65	65	64	61		69
562	95.06	95.66	65	65	64	61		69
563	95.06	95.65	65	65	65	61		69
564	94.97	95.59	64	64	65	61		69
565	94.91	95.5	64	64	65	61		69
566	94.91	95.41	64	64	64	61		69
567	94.87	95.35	64	64	64	61		69
568	94.86	95.3	64	64	64	60		69
569	94.74	95.23	63	64	63	60		69
570	94.74	95.16	63	63	62	60		69
571	94.67	95.11	63	64	62	60		69
572	94.64	95.13	64	64	62	61		69
573	94.72	95.17	63	63	62	61		69
574	94.72	95.26	63	63	62	61		69
575	94.79	95.36	62	62	62	61		69
576	94.86	95.45	63	63	62	61		70
577	94.88	95.53	64	64	62	61		70
578	94.91	95.56	64	64	63	61		70
579	94.92	95.54	64	64	63	61		70
580	94.93	95.52	64	64	64	61		70
581	94.92	95.51	64	64	65	61		70
582	94.9	95.52	65	65	65	62		71
583	94.9	95.58	65	65	66	62		71
584	94.93	95.63	65	65	66	62		70
585	94.96	95.58	65	65	66	62		70
586	94.91	95.59	66	65	66	62		71
587	94.92	95.59	67	66	66	61		71
588	94.92	95.59	67	67	66	61		71
589	94.91	95.51	68	68	66	61		71
590	94.93	95.52	67	67	67	61		71
591	95.03	95.54	65	66	67	61		71
592	95.03	95.56	65	65	67	61		71
593	95.02	95.66	67	67	67	61		71
594	95.03	95.65	68	68	67	61		71
595	95.09	95.69	65	67	67	61		71
596	95.11	95.72	64	65	67	61		70
597	95.11	95.74	64	64	66	61		70
598	95.1	95.68	64	64	66	61		70
599	95.07	95.59	65	65	65	61		70
600	95	95.51	65	65	65	61		71
601	95	95.5	65	65	65	61		71
602	94.94	95.43	64	64	65	60		71
603	94.84	95.27	63	63	65	60		71
604	94.72	95.08	63	63	65	60		71
605	94.58	94.9	64	65	65	60		71
606	94.42	95.06	66	66	65	60		70
607	94.3	94.97	66	64	65	60		70
608	94.16	94.88	65	64	65	60		70
609	93.98	94.77	64	64	64	60		70
610	93.77	94.29	64	64	65	60		70
611	93.53	93.98	65	65	65	60		70
612	93.37	93.76	66	66	65	60		70
613	93.2	93.49	64	64	65	60		70
614	92.98	93.13	63	63	65	60		70
615	92.77	92.86	63	63	64	60		70
616	92.56	92.66	63	63	64	59		69
617	92.27	92.5	65	63	64	59		69
618	92.27	92.35	65	65	64	59		69
619	92.12	92.12	66	66	64	59		69
620	91.92	92	65	65	65	59		68
621	91.81	91.84	64	64	65	59		68
622	91.63	91.65	65	65	66	59		68
623	91.47	91.48	66	66	68	59		68
624	91.3	91.35	66	66	67	59		68
625	91.17	91.26	65	65	67	59		68
626	91.09	91.21	65	65	67	59		68
627	91.03	91.15	65	65	67	59		68
628	90.97	91.19	66	68	67	59		68
629	90.83	91.13	67	67	67	59		68
630	90.71	90.92	67	67	68	59		67
631	90.59	90.76	66	66	67	58		67
632	90.49	90.69	67	67	68	58		68
633	90.44	90.65	68	68	68	58		68
634	90.4	90.55	70	70	68	58		67
635	90.31	90.45	70	70	68	58		67
636	90.28	90.43	69	69	68	58		68
637	90.26	90.42	68	68	68	58		68
638	90.24	90.38	68	68	68	58		68
639	90.19	90.33	69	69	68	58		68
640	90.14	90.28	70	70	68	57		68
641	90.13	90.32	70	70	68	57		68
642	90.15	90.3	69	69	69	57		68
643	90.13	90.25	69	69	69	57		68
644	90.09	90.13	69	69	69	57		67
645	90.01	90	70	70	69	57		67
646	89.94	89.96	71	71	69	57		67
647	89.93	89.95	71	71	70	57		67
648	89.86	89.82	70	70	70	57		67
649	89.73	89.64	70	70	70	57		67
650	89.61	89.55	71	71	70	57		67
651	89.57	89.53	73	73	71	57		67
652	89.57	89.48	72	72	71	57		67
653	89.47	89.35	72	72	72	57		67
654	89.32	89.16	72	72	72	57		68
655	89.14	88.95	72	72	72	58		68
656	88.99	88.84	73	73	72	58		67
657	88.94	88.83	74	74	73	58		67
658	88.94	88.86	75	75	73	58		67
659	88.93	88.77	75	75	74	57		67
660	88.84	88.69	73	72	74	57		68
661	88.76	88.65	71	71	73	57		68
662	88.74	88.69	71	71	73	57		67
663	88.77	88.77	71	71	72	57		67
664	88.83	88.8	72	72	72	57		67
665	88.8	88.62	73	73	72	57		67
666	88.66	88.45	72	72	72	57		67
667	88.52	88.12	70	70	72	57		67
668	88.21	87.9	69	68	71	57		67
669	88.04	87.76	69	69	70	56		67
670	87.97	87.79	70	70	70	56		67
671	88.04	87.91	70	70	70	56		67
672	88.2	88.04	69	69	70	56		67
673	88.32	88.12	68	68	70	56		67
674	88.3	88.12	68	67	70	56		65
675	88.1	87.82	70	70	70	56		65
676	87.95	87.84	71	71	70	56		65
677	87.99	87.92	72	72	71	56		65
678	88.07	87.98	70	70	71	56		65
679	88.07	87.96	69	69	71	57		65
680	87.99	87.84	68	68	70	57		65
681	87.98	87.86	67	67	69	57		65
682	88.07	88.04	68	68	68	57		66
683	88.21	88.08	69	69	68	57		66
684	88.17	88	70	70	68	56		66
685	88.06	87.81	69	69	68	56		66
686	87.92	87.62	67	67	68	56		66
687	87.98	87.62	67	67	68	56		66
688	88.13	87.75	67	67	68	56		65
689	88.28	87.89	67	68	68	56		65
690	88.19	87.78	70	70	68	56		65
691	88.01	87.57	69	69	68	56		65
692	87.77	87.25	68	68	68	56		67
693	87.75	87.14	67	67	68	55		67
694	87.83	87.2	67	67	68	55		67
695	88.01	87.46	67	67	67	55		67
696	88.02	87.57	68	69	67	55		65
697	87.81	87.36	69	69	67	55		65
698	87.52	86.96	67	67	67	55		65
699	87.38	86.83	66	66	67	55		65
700	87.33	86.79	66	66	67	55		65
701	87.4	86.96	66	66	67	55		65
702	87.46	87.08	66	67	67	55		65
703	87.47	87.05	68	68	67	55		65
704	87.43	86.97	69	69	67	55		66
705	87.35	86.87	67	67	68	55		66
706	87.22	86.66	66	66	68	55		66
707	87.07	86.41	66	67	67	55		66
708	86.85	86.35	68	68	68	55		66
709	86.8	86.41	68	68	68	55		66
710	86.85	86.55	67	67	68	55		66
711	86.97	86.75	66	66	68	55		66
712	87.14	86.93	66	66	67	55		66
713	87.29	87.09	66	66	67	55		66
714	87.39	87.12	69	69	68	55		66
715	87.36	86.98	69	69	68	55		66
716	87.19	86.76	69	69	68	55		65
717	87.06	86.66	68	68	68	55		65
718	87	86.65	67	67	68	54		65
719	87	86.69	67	67	68	54		65
720	87.05	86.8	68	69	68	54		65
721	87.26	87.01	71	71	68	54		65
722	87.39	87.1	71	71	69	54		65
723	87.55	87.22	69	69	69	55		65
724	87.61	87.24	68	68	69	55		65
725	87.57	87.14	68	68	68	55		65
726	87.46	87.01	68	68	68	55		65
727	87.41	87.06	69	69	68	54		65
728	87.55	87.24	69	68	68	54		65
729	87.64	87.33	68	68	68	54		65
730	87.6	87.35	66	66	68	54		65
731	87.49	87.2	66	66	67	54		65
732	87.24	86.82	68	68	67	53		65
733	87.16	86.78	69	69	68	53		65
734	87.24	86.85	69	69	68	53		65
735	87.22	86.74	68	68	69	53		65
736	87.03	86.53	68	68	69	53		65
737	86.87	86.45	68	68	69	54		65
738	86.85	86.5	69	69	69	54		65
739	86.89	86.59	70	70	69	54		65
740	86.99	86.65	71	71	70	54		64
741	87.01	86.56	69	69	71	54		64
742	86.91	86.39	69	69	71	54		64
743	86.67	86.21	70	70	71	54		64
744	86.58	86.2	70	70	71	54		65
745	86.63	86.29	71	71	71	54		65
746	86.69	86.27	72	72	71	54		65
747	86.63	86.06	71	71	71	53		65
748	86.45	85.82	69	69	71	53		64
749	86.23	85.44	68	68	71	53		64
750	86.09	85.3	68	68	70	53		63
751	86.08	85.3	69	69	70	53		63
752	86.15	85.4	70	70	70	53		63
753	86.19	85.26	70	70	70	53		63
754	86.12	85.2	69	69	70	53		63
755	85.96	85.1	67	67	70	53		63
756	85.66	84.57	67	67	70	53		63
757	85.18	84.31	67	67	69	52		63
758	85.11	84.34	69	69	69	52		63
759	85.17	84.47	70	70	69	52		63
760	85.32	84.59	69	69	70	52		64
761	85.36	84.64	68	68	70	51		64
762	85.21	84.49	67	67	70	51		63
763	85.14	84.51	69	69	70	51		63
764	85.31	84.56	71	71	70	51		64
765	85.4	84.61	71	71	70	51		64
766	85.31	84.48	70	70	71	52		63
767	85.13	84.28	69	69	71	52		63
768	85.1	84.33	69	69	71	52		63
769	85.25	84.38	70	70	71	52		63
770	85.22	84.33	72	72	71	52		63
771	85.1	84.17	72	72	71	52		63
772	84.85	83.86	71	71	71	52		63
773	84.69	83.74	69	69	71	52		63
774	84.71	83.81	68	68	71	52		63
775	84.92	84.1	68	68	70	52		63
776	84.95	84.06	70	70	70	51		63
777	84.78	83.88	71	70	70	51		63
778	84.54	83.49	69	69	70	51		63
779	84.38	83.23	67	67	70	51		63
780	84.36	83.27	66	66	69	51		62
781	84.49	83.54	66	66	68	51		62
782	84.63	83.88	67	69	68	51		63
783	84.68	83.86	70	70	68	51		63
784	84.57	83.72	69	69	68	51		63
785	84.39	83.49	67	67	68	51		63
786	84.13	83.14	67	67	68	51		63
787	84.05	83.07	67	67	68	51		63
788	84.14	83.2	68	68	68	51		62
789	84.27	83.36	69	70	68	51		62
790	84.25	83.26	68	68	68	51		62
791	84.18	83.18	67	67	68	50		62
792	83.98	82.83	67	67	68	50		62
793	83.9	82.73	68	68	68	50		62
794	84.02	82.85	70	70	68	50		61
795	84.13	82.93	69	69	69	50		61
796	84.03	82.88	68	68	69	50		61
797	83.82	82.6	69	69	69	50		61
798	83.65	82.59	70	70	69	50		61
799	83.68	82.7	70	70	69	50		61
800	83.77	82.81	68	68	69	51		61
801	83.83	82.79	67	67	68	51		61
802	83.83	82.68	67	67	68	51		61
803	83.74	82.49	67	67	67	51		61
804	83.61	82.3	67	68	67	51		61
805	83.58	82.36	68	68	67	49		61
806	83.62	82.45	68	67	67	49		62
807	83.66	82.48	66	66	67	49		62
808	83.61	82.41	66	66	67	49		62
809	83.55	82.41	66	66	67	49		62
810	83.54	82.47	67	67	67	48		62
811	83.58	82.56	68	68	67	48		62
812	83.66	82.6	68	68	67	48		62
813	83.66	82.48	67	67	67	48		62
814	83.52	82.19	66	66	67	48		62
815	83.3	81.83	65	65	67	48		62
816	83.05	81.55	67	67	66	48		62
817	82.85	81.5	67	67	65	48		62
818	82.84	81.6	68	68	63	48		61
819	82.93	81.7	67	67	59	48		61
820	82.95	81.63	66	66	59	47		62
821	82.76	81.4	66	66	60	47		62
822	82.44	81.03	67	67	61	47		62
823	82.4	81.12	69	69	62	47		62
824	82.55	81.17	69	69	65	48		61
825	82.53	81.14	69	69	71	48		61
826	82.36	80.94	69	69	71	48		60
827	82.39	80.96	70	71	71	48		60
828	82.59	81.18	72	72	71	48		60
829	82.58	81.1	74	74	71	49		60
830	82.48	80.99	75	74	70	49		60
831	82.41	81.04	74	72	68	49		60
832	82.43	81.12	71	71	65	49		61
833	82.47	81.23	71	71	59	49		61
834	82.55	81.33	70	70	60	49		61
835	82.63	81.38	70	70	60	49		61
836	82.72	81.43	70	70	61	49		61
837	82.81	81.48	70	71	62	49		61
838	82.88	81.54	71	71	65	49		61
839	82.79	81.37	69	69	68	47		61
840	82.64	81.02	68	68	68	47		61
841	82.33	80.61	68	68	68	47		61
842	82.05	80.42	68	68	67	47		61
843	82.09	80.6	69	69	67	47		61
844	82.23	80.87	70	70	66	47		60
845	82.39	80.94	70	70	64	47		60
846	82.49	80.93	68	68	60	47		60
847	82.43	80.77	67	67	60	47		60
848	81.86	79.88	67	67	60	47		60
849	81.2	79.47	66	67	60	47		60
850	81.05	79.34	67	67	61	47		60
851	81.07	79.35	68	68	62	47		60
852	81.04	79.2	67	67	64	47		60
853	80.86	78.95	66	66	66	47		60
854	80.6	78.69	66	66	66	46		60
855	80.69	78.77	66	66	66	46		60
856	80.97	79.08	67	68	66	46		60
857	81.26	79.28	69	69	66	46		60
858	81.17	79.13	68	68	66	46		60
859	80.91	78.8	67	67	66	46		60
860	80.72	78.65	67	67	66	46		59
861	80.67	78.63	67	67	66	46		59
862	80.84	78.8	68	68	67	46		59
863	80.8	78.66	70	70	67	47		59
864	80.61	78.43	68	68	67	47		59
865	80.46	78.29	67	67	67	47		59
866	80.43	78.28	66	66	67	47		60
867	80.61	78.59	66	66	66	47		60
868	81	79.12	66	66	65	46		60
869	81.19	79.42	67	67	65	46		60
870	81.15	79.36	68	68	66	46		60
871	80.95	79.06	68	68	66	46		60
872	80.8	78.91	67	67	66	46		59
873	80.93	78.96	66	66	66	45		59
874	81.18	79.18	65	65	66	45		59
875	81.15	79.06	66	66	66	45		59
876	80.75	78.56	67	67	65	45		59
877	80.36	77.89	68	68	64	45		59
878	79.99	77.42	69	69	61	46		59
879	79.64	77.04	67	67	55	46		59
880	79.37	76.94	66	66	53	46		59
881	79.27	77.11	65	65	54	46		59
882	79.37	77.48	65	65	54	46		59
883	79.64	77.96	65	65	55	44		59
884	79.96	78.37	67	67	57	44		59
885	80.21	78.37	68	68	61	44		59
886	80.08	78.15	69	69	61	44		59
887	79.84	77.86	67	67	61	44		59
888	79.83	77.77	67	67	61	44		59
889	80.06	77.93	67	67	62	44		59
890	80.18	78	69	69	62	44		58
891	79.94	77.64	71	71	64	44		58
892	79.71	77.35	71	71	67	45		58
893	79.53	77.27	69	70	70	45		58
894	79.43	77.2	68	68	70	45		58
895	79.57	77.34	68	68	70	45		58
896	79.89	77.66	68	69	69	45		58
897	79.91	77.61	69	69	69	44		58
898	79.57	77.1	68	68	69	44		58
899	79.38	76.85	66	66	68	44		58
900	79.34	76.76	66	66	68	44		58
901	79.58	77.11	66	66	67	44		58
902	79.85	77.49	66	66	66	44		58
903	79.85	77.5	67	67	66	44		58
904	79.72	77.24	67	68	67	44		58
905	79.5	76.86	66	66	67	44		58
906	79.26	76.68	65	65	66	44		58
907	79.16	76.79	64	64	66	44		58
908	79.24	77.17	64	64	65	44		58
909	79.46	77.46	65	66	64	44		58
910	79.6	77.46	66	66	61	44		58
911	79.5	77.17	66	65	55	44		58
912	79.27	76.83	65	64	43	43		58
913	79.01	76.52	64	64	43	43		58
914	78.86	76.45	64	64	44	43		57
915	78.84	76.55	65	65	45	43		57
916	78.96	76.67	67	67	46	43		57
917	79.04	76.5	68	68	46	42		57
918	78.92	76.31	68	68	46	42		57
919	78.67	76.03	67	66	46	42		57
920	78.45	75.96	67	67	47	42		57
921	78.49	76.08	67	67	48	42		57
922	78.66	76.26	67	67	50	42		57
923	78.7	76.22	67	67	55	42		57
924	78.56	75.94	68	68	55	42		57
925	78.34	75.82	69	69	55	42		57
926	78.31	75.89	68	68	55	42		57
927	78.44	75.97	68	68	55	42		57
928	78.7	76.19	69	69	56	42		57
929	78.84	76.22	71	72	57	42		57
930	78.78	76.02	72	71	59	42		57
931	78.58	75.62	70	70	63	43		57
932	78.24	74.98	69	69	68	43		57
933	77.78	74.28	70	70	67	43		57
934	77.37	73.76	71	71	66	43		58
935	77.03	73.46	71	71	65	43		58
936	76.76	73.48	69	69	62	40		58
937	76.87	73.63	68	68	56	40		58
938	77.14	74.29	69	69	56	40		58
939	77.85	75.16	71	71	57	40		58
940	78.23	75.63	72	72	59	40		57
941	78.62	75.89	71	71	62	41		57
942	78.69	75.96	70	70	68	41		57
943	78.59	76	70	70	69	41		57
944	78.64	76.23	72	72	72	41		56
945	78.76	76.36	73	73	74	41		56
946	78.87	76.29	72	72	74	42		57
947	78.77	76.18	70	70	74	42		57
948	78.58	76	69	69	73	42		56
949	78.59	76.27	70	70	72	42		56
950	78.98	76.58	71	71	71	42		56
951	79.09	76.65	72	72	68	41		56
952	79.06	76.51	70	70	62	41		57
953	78.89	76.25	68	68	62	41		57
954	78.75	76.17	67	67	62	41		57
955	78.89	76.37	67	67	62	41		57
956	79.11	76.72	67	67	61	41		57
957	79.1	76.44	69	69	60	41		57
958	78.88	76.05	69	67	59	41		57
959	78.56	75.58	67	67	55	41		57
960	78.39	75.4	65	65	48	41		57
961	78.18	75.39	65	65	49	41		57
962	78.26	75.55	66	66	49	41		57
963	78.39	75.72	67	67	49	41		57
964	78.41	75.66	68	68	49	41		57
965	78.26	75.41	67	67	49	40		57
966	77.97	75.02	66	66	49	40		57
967	77.66	74.72	65	65	49	40		57
968	77.64	74.71	65	65	50	40		57
969	77.99	75.14	67	67	52	40		57
970	78.15	75.09	67	67	55	40		57
971	78.08	74.98	66	66	61	40		57
972	78.07	75.01	65	65	62	40		56
973	78.24	75.2	64	64	61	40		56
974	78.58	75.68	65	65	61	40		56
975	78.78	75.95	66	66	61	40		56
976	78.77	75.95	68	66	61	40		56
977	78.5	75.95	68	68	60	40		56
978	78.43	75.94	66	69	58	40		56
979	78.18	75.89	66	68	58	40		56
980	78.16	75.86	65	67	58	41		57
981	78.21	75.81	65	67	59	41		57
982	78.22	75.64	66	67	59	41		57
983	78.15	75.39	67	68	59	41		57
984	78.01	75.01	66	67	58	41		57
985	77.67	74.47	65	66	58	40		57
986	77.43	74.22	64	65	58	40		56
987	77.45	74.2	65	65	58	40		56
988	77.81	74.54	68	69	59	40		57
989	77.89	74.57	67	67	60	40		57
990	77.78	74.38	66	66	63	40		56
991	77.5	74.16	65	66	64	40		56
992	77.35	74.13	65	66	64	40		56
993	77.38	74.4	66	66	64	40		56
994	77.58	74.84	67	67	65	41		56
995	77.74	75.04	68	68	65	41		56
996	77.78	74.95	67	67	66	41		56
997	77.63	74.75	65	65	66	41		56
998	77.38	74.36	65	65	65	41		56
999	77.3	74.65	67	67	65	40		56
1000	77.5	74.86	68	68	65	40		56
1001	77.73	75.12	68	68	64	40		56
1002	77.88	75.27	67	67	62	40		56
1003	77.87	75.23	66	66	62	40		56
1004	77.6	74.8	66	66	62	39		56
1005	77.4	74.63	67	69	61	39		56
1006	77.56	74.85	70	70	61	39		56
1007	77.66	74.87	68	68	60	39		56
1008	77.69	74.8	67	67	58	39		56
1009	77.73	74.91	66	66	58	39		56
1010	77.9	75.26	66	66	58	39		56
1011	78.1	75.4	66	66	58	39		56
1012	78.16	75.28	68	68	58	39		55
1013	78.16	74.96	68	68	58	39		55
1014	78.09	74.64	68	67	58	39		56
1015	78.09	74.08	68	66	58	39		56
1016	77.9	73.89	68	65	59	39		55
1017	77.92	74.25	69	67	59	39		55
1018	78.04	74.33	70	68	61	39		56
1019	77.96	74.23	71	69	64	40		56
1020	77.71	73.93	69	68	69	40		55
1021	77.44	73.71	68	67	69	40		55
1022	77.45	73.76	68	67	69	40		55
1023	77.68	74.15	68	67	68	40		55
1024	77.92	74.57	67	67	67	40		55
1025	77.8	74.38	69	68	65	40		55
1026	77.56	74.11	69	69	61	40		55
1027	77.46	74.12	67	67	53	40		55
1028	77.54	74.24	66	66	53	39		56
1029	77.87	74.66	66	66	54	39		56
1030	78.09	74.98	67	67	54	39		55
1031	78.13	74.92	67	67	56	39		55
1032	77.97	74.65	66	66	58	39		56
1033	77.69	74.25	65	65	63	39		56
1034	77.28	73.58	65	65	63	39		55
1035	76.85	73.12	65	65	63	39		55
1036	76.52	73.06	64	64	63	39		55
1037	76.47	73.29	64	65	62	39		55
1038	76.85	73.97	66	66	61	39		55
1039	77.17	74.26	65	65	59	39		55
1040	77.35	74.5	64	64	55	39		56
1041	77.39	74.49	64	64	55	39		56
1042	77.4	74.57	65	65	55	39		56
1043	77.54	74.8	66	66	56	39		56
1044	77.71	74.93	65	65	57	39		56
1045	77.74	74.9	64	64	60	39		56
1046	77.69	74.77	64	64	61	39		56
1047	77.49	74.38	64	64	64	39		56
1048	77.27	74.09	65	66	69	39		55
1049	77.31	74.13	66	65	69	39		55
1050	77.28	74.09	65	65	68	39		56
1051	77.29	74.05	64	64	68	39		56
1052	77.22	74.02	64	64	68	39		56
1053	77.27	74.18	65	65	67	39		56
1054	77.4	74.35	64	64	65	39		56
1055	77.45	74.38	64	64	65	39		56
1056	77.36	74.21	65	65	65	39		55
1057	77.12	73.79	65	65	65	38		55
1058	76.8	73.44	64	64	64	38		56
1059	76.69	73.42	64	64	64	38		56
1060	76.77	73.6	64	64	64	38		56
1061	76.93	73.85	67	67	64	38		56
1062	77.03	73.86	68	68	65	38		55
1063	77	73.84	66	66	65	38		55
1064	77.04	73.91	65	65	66	38		55
1065	77.14	74.03	65	65	66	38		55
1066	77.21	74.15	65	65	66	38		55
1067	77.33	74.31	65	65	65	39		55
1068	77.45	74.39	66	66	64	39		55
1069	77.38	74.11	67	67	62	39		55
1070	77.12	73.85	67	67	58	39		56
1071	76.88	73.75	65	65	55	39		56
1072	76.83	73.87	65	66	55	38		56
1073	77	74	67	67	56	38		56
1074	77.12	74.17	68	68	57	38		56
1075	77.26	74.3	68	68	59	38		56
1076	77.31	74.14	66	66	63	38		56
1077	77.17	73.82	65	66	63	38		56
1078	76.84	73.25	66	66	63	38		56
1079	76.43	72.9	68	68	63	38		56
1080	76.48	73.07	68	68	63	38		55
1081	76.72	73.37	67	67	64	38		55
1082	76.79	73.49	66	66	66	37		55
1083	76.73	73.41	66	66	66	37		55
1084	76.97	73.55	66	66	66	37		55
1085	77.35	73.96	67	67	65	37		55
1086	77.41	73.95	66	66	64	37		55
1087	77.26	73.76	64	64	61	37		55
1088	77.17	73.72	64	64	57	37		55
1089	77.31	73.91	65	65	51	37		55
1090	77.34	73.73	67	67	51	37		55
1091	77.1	73.46	67	67	52	39		55
1092	76.8	72.99	67	67	53	39		55
1093	76.49	72.66	67	67	54	39		55
1094	76.32	72.56	66	66	57	39		55
1095	76.34	72.7	65	65	61	39		55
1096	76.57	73.08	65	65	61	38		55
1097	76.77	73.32	66	66	60	38		55
1098	76.85	73.3	65	65	59	38		55
1099	76.69	73.11	63	63	57	38		55
1100	76.57	72.97	63	63	56	38		55
1101	76.76	73.24	63	64	54	35		55
1102	76.86	73.16	67	67	50	35		55
1103	76.66	73	65	65	42	35		55
1104	76.45	72.63	65	64	42	35		55
1105	75.91	71.98	64	64	42	35		55
1106	75.54	71.62	65	65	43	39		54
1107	75.44	71.76	65	65	44	39		54
1108	75.66	72.21	65	65	46	39		54
1109	76.06	72.7	64	64	51	39		54
1110	76.28	72.9	64	64	61	39		55
1111	76.3	72.8	65	65	66	38		55
1112	76.29	72.96	66	66	67	38		55
1113	76.65	73.46	65	65	67	38		55
1114	77.1	73.95	64	64	67	38		55
1115	77.42	74.32	64	64	66	38		55
1116	77.5	74.36	67	67	66	37		55
1117	77.44	74.24	67	67	64	37		55
1118	77.38	74	66	66	62	37		55
1119	77.26	73.93	65	65	58	37		55
1120	77.41	74.18	65	65	58	38		55
1121	77.66	74.53	65	65	58	38		55
1122	77.79	74.64	66	66	58	38		55
1123	77.72	74.41	67	67	58	38		55
1124	77.64	74.35	67	67	57	38		55
1125	77.49	74.24	65	65	55	38		55
1126	77.64	74.22	64	64	51	38		55
1127	77.94	74.53	64	65	51	38		55
1128	77.93	74.49	66	66	51	38		55
1129	77.76	74.27	66	66	51	38		55
1130	77.24	73.6	64	64	51	38		55
1131	77.01	73.35	63	63	51	38		55
1132	76.93	73.26	63	63	51	38		56
1133	77.2	73.62	64	64	52	38		56
1134	77.42	73.83	64	64	53	38		56
1135	77.42	73.78	63	63	55	38		56
1136	77.19	73.5	62	62	59	38		56
1137	77.17	73.59	63	63	58	38		56
1138	77.37	73.91	64	64	58	38		55
1139	77.65	74.22	65	65	57	38		55
1140	77.79	74.34	63	63	56	37		55
1141	77.72	74.28	63	63	56	37		55
1142	77.43	73.87	63	64	56	37		55
1143	77.23	73.59	66	66	56	37		55
1144	77.18	73.53	66	66	56	37		55
1145	77.12	73.41	65	65	55	38		55
1146	76.95	73.28	64	64	55	38		55
1147	77	73.4	64	64	55	38		55
1148	77	73.72	64	64	56	38		55
1149	77.62	74.12	64	64	56	36		55
1150	77.71	74.21	66	68	58	36		55
1151	77.72	74.11	68	68	61	36		55
1152	77.86	74.36	66	66	67	36		55
1153	78.02	74.63	66	66	69	36		55
1154	78.19	74.84	66	66	68	37		55
1155	78.17	74.8	67	67	68	37		55
1156	78.04	74.62	69	70	69	37		55
1157	77.62	73.94	70	70	69	37		55
1158	77.36	73.41	68	68	70	37		55
1159	77.18	73.14	67	67	69	38		55
1160	76.71	73	66	66	69	38		55
1161	76.66	73.13	65	66	68	38		55
1162	77.16	73.52	67	67	67	38		56
1163	77.39	73.74	66	66	66	38		56
1164	77.57	74.03	64	64	65	37		56
1165	77.5	73.98	64	64	63	37		56
1166	77.56	74.12	64	64	59	37		56
1167	77.77	74.48	64	64	60	37		56
1168	77.97	74.74	66	66	60	37		55
1169	77.96	74.59	67	67	60	37		55
1170	77.75	74.24	65	65	61	37		55
1171	77.4	73.87	64	64	61	37		55
1172	77.2	73.88	63	63	61	37		54
1173	77.31	74.15	63	63	61	37		54
1174	77.6	74.54	63	64	61	38		55
1175	77.74	74.45	64	64	60	38		55
1176	77.56	74.15	65	65	58	38		54
1177	77.44	73.78	64	64	54	38		54
1178	77.44	73.71	63	63	55	38		55
1179	77	73.83	64	64	55	37		55
1180	77.19	74.02	65	65	56	37		55
1181	77.41	74.19	67	67	58	37		55
1182	77.43	74.1	66	66	58	37		55
1183	77.26	73.78	65	65	58	37		55
1184	77.01	73.55	64	64	58	37		55
1185	77.02	73.63	64	64	58	37		55
1186	77.31	74.03	64	64	58	37		55
1187	77.57	74.19	67	67	58	37		55
1188	77.49	73.96	67	67	58	37		55
1189	77.21	73.62	66	66	57	37		55
1190	77.16	73.48	65	65	56	37		55
1191	77.27	73.56	65	65	56	37		55
1192	77.7	74.09	66	66	57	37		54
1193	77.9	74.32	67	67	57	36		54
1194	77.84	74.09	68	68	59	36		54
1195	77.54	73.76	66	66	62	36		54
1196	77.21	73.34	65	65	62	36		54
1197	77.12	73.21	64	64	62	36		54
1198	77.36	73.96	65	65	62	36		54
1199	77.95	74.52	66	66	62	36		54
1200	77.9	74.37	65	65	63	36		54
1201	77.73	74.1	64	64	63	36		54
1202	77.51	73.91	63	63	63	36		55
1203	77.44	74	64	64	63	36		55
1204	77.58	74.39	65	65	63	36		55
1205	77.75	74.62	66	66	63	36		55
1206	77.78	74.52	65	65	64	36		55
1207	77.6	74.29	65	65	64	36		55
1208	77.29	73.86	65	67	65	37		55
1209	77.08	73.82	69	69	67	37		55
1210	77.16	73.93	68	68	71	37		55
1211	77.34	74.2	66	66	71	37		55
1212	77.49	74.29	66	66	71	37		55
1213	77.54	74.23	67	67	70	36		55
1214	77.49	74.11	68	69	69	36		54
1215	77.4	74.18	69	68	67	36		54
1216	77.43	74.38	68	67	63	36		54
1217	77.48	74.49	66	66	54	36		54
1218	77.51	74.44	66	66	51	37		54
1219	77.45	74.27	66	66	52	37		54
1220	77.37	74.05	67	67	52	37		54
1221	77.24	73.81	67	67	54	37		54
1222	77.02	73.46	66	66	57	36		55
1223	76.77	73.02	65	65	63	36		55
1224	76.46	72.44	65	65	64	36		55
1225	76.09	71.98	66	66	66	36		55
1226	76.03	72.4	67	67	66	36		55
1227	76.33	72.87	65	65	66	35		55
1228	76.56	73.06	63	63	66	35		54
1229	76.87	73.22	64	64	65	35		54
1230	77.14	73.38	65	65	65	35		54
1231	77.01	73.3	65	65	65	35		54
1232	76.97	73.2	63	63	65	37		54
1233	76.72	73.12	62	62	65	37		54
1234	76.49	72.53	62	62	64	37		54
1235	76.09	72.3	62	63	63	37		54
1236	75.84	72.28	62	62	61	37		54
1237	75.73	72.51	61	61	61	36		54
1238	75.92	72.94	62	62	61	36		54
1239	76.24	73.33	62	62	60	36		54
1240	76.37	73.64	61	61	59	36		54
1241	76.62	73.64	60	60	59	36		54
1242	76.85	73.8	60	60	59	35		54
1243	77.02	74.06	61	61	59	35		54
1244	77.09	74.19	60	60	59	35		54
1245	77.26	74.17	60	60	60	35		54
1246	77.35	74.26	60	60	60	35		54
1247	77.35	74.12	60	61	60	39		54
1248	77.08	73.74	62	62	60	39		54
1249	76.82	73.39	62	62	60	39		54
1250	76.57	73.12	61	61	61	39		55
1251	76.41	72.96	61	61	62	45		55
1252	76.4	73.06	62	62	61	45		56
1253	76.68	73.5	62	62	61	45		56
1254	77.21	74.15	61	61	60	45		59
1255	77.87	74.92	61	61	58	45		59
1256	77.87	74.92	61	61	54	46		62
1257	78.48	74.92	61	61	54	46		62
1258	78.48	74.92	61	61	54	46		62
1259	78.47	75.47	61	61	55	46		62
1260	79.19	76.49	62	62	57	46		62
1261	80.23	77.85	62	62	60	46		62
1262	81.8	79.5	62	62	63	46		62
1263	83.87	81.35	62	62	65	46		62
1264	85.8	83.07	63	63	66	46		63
1265	87.03	84.14	64	64	66	46		63
1266	88.31	85.14	64	64	66	49		63
1267	90.11	86.75	63	63	66	49		63
1268	91.88	88.89	63	63	66	49		63
1269	93.3	91.59	63	64	65	49		63
1270	95.13	93.43	64	63	64	49		63
1271	96	94.86	63	63	63	50		63
1272	96.6	95.84	63	63	61	50		64
1273	96.78	96.77	62	62	58	50		64
1274	97.34	97.38	61	61	59	50		65
1275	97.86	98.09	62	62	59	50		65
1276	98.2	98.41	62	62	59	51		65
1277	98.3	98.62	61	61	59	51		65
1278	98.37	98.7	60	60	59	51		66
1279	98.49	98.82	59	59	59	51		66
1280	98.6	99.02	59	59	59	51		66
1281	98.7	99.19	58	58	58	51		66
1282	98.77	99.29	57	57	57	51		66
1283	98.78	99.34	57	57	55	51		66
1284	98.84	99.39	56	56	53	51		66
1285	98.87	99.42	57	57	53	51		66
1286	98.89	99.44	57	57	53	51		66
1287	98.92	99.46	58	58	54	51		66
1288	98.94	99.47	58	58	54	51		66
1289	98.97	99.5	58	58	55	51		66
1290	98.98	99.5	58	58	57	52		66
1291	98.99	99.5	58	58	59	52		66
1292	98.99	99.48	58	57	59	52		66
1293	99.01	99.5	58	57	59	52		66
1294	99.01	99.54	57	57	59	52		66
1295	99.05	99.52	57	57	58	52		66
1296	99.07	99.54	57	57	57	52		66
1297	99.1	99.53	57	57	55	52		66
1298	99.11	99.54	55	55	53	52		66
1299	99.1	99.56	55	55	50	52		66
1300	99.12	99.56	55	55	50	52		66
1301	99.12	99.57	56	56	50	52		66
1302	99.19	99.63	55	55	50	52		66
1303	99.23	99.65	55	55	51	52		66
1304	99.22	99.64	54	54	52	52		66
1305	99.2	99.63	54	54	53	52		66
1306	99.15	99.6	54	54	52	52		66
1307	99.19	99.6	53	54	52	52		66
1308	99.21	99.63	53	53	52	52		65
1309	99.22	99.64	54	54	52	52		65
1310	99.23	99.68	53	53	52	52		65
1311	99.23	99.69	53	53	53	52		65
1312	99.23	99.7	53	53	53	52		67
1313	99.24	99.66	53	53	53	52		67
1314	99.21	99.64	54	54	53	52		67
1315	99.14	99.6	53	53	53	52		67
1316	99.11	99.55	52	52	53	52		67
1317	99.09	99.52	52	52	52	52		67
1318	99.08	99.52	52	52	51	52		67
1319	99.12	99.53	52	52	51	51		67
1320	99.12	99.56	53	53	51	51		67
1321	99.15	99.56	52	52	52	51		67
1322	99.15	99.56	51	51	52	51		66
1323	99.14	99.52	52	52	51	51		66
1324	99.13	99.51	52	52	51	52		67
1325	99.16	99.53	52	51	51	52		67
1326	99.17	99.51	51	51	51	52		67
1327	99.17	99.52	51	51	50	52		67
1328	99.14	99.5	50	50	49	52		66
1329	99.14	99.49	51	51	49	50		66
1330	99.27	99.59	52	52	49	50		66
1331	99.48	99.47	52	51	50	50		66
1332	99.42	99.38	51	51	50	50		66
1333	99.47	99.36	50	50	50	50		66
1334	99.38	99.33	50	50	50	48		66
1335	99.39	99.38	49	49	50	48		66
1336	99.46	99.52	49	49	49	48		65
1337	99.61	99.67	49	49	48	48		65
1338	99.6	99.7	49	49	48	48		65
1339	99.73	99.92	49	49	48	47		65
1340	99.73	100.02	48	48	47	47		65
1341	99.76	100.07	48	48	47	47		65
1342	99.64	100.15	48	48	47	47		65
1343	99.64	100.14	48	48	48	47		65
1344	99.62	100.22	48	48	48	47		64
1345	99.63	100.27	49	49	48	47		64
1346	99.92	100.49	49	49	49	47		64
1347	100.01	100.52	49	49	50	47		64
1348	100.03	100.5	49	49	50	48		64
1349	100.11	100.56	49	49	49	48		64
1350	100.03	100.51	49	49	49	48		63
1351	100.01	100.53	49	49	49	48		63
1352	100.06	100.53	49	49	49	48		63
1353	100	100.38	49	49	49	48		63
1354	100.04	100.37	49	49	49	48		63
1355	100.12	100.38	50	50	50	48		63
1356	100.2	100.46	49	49	50	48		64
1357	100.23	100.52	49	49	50	48		64
1358	100.22	100.53	49	49	50	48		64
1359	100.21	100.58	49	49	50	48		64
1360	100.24	100.62	48	48	49	48		64
1361	100.31	100.65	48	48	48	48		64
1362	100.35	100.72	48	48	46	48		64
1363	100.37	100.77	48	48	46	47		64
1364	100.37	100.77	48	47	46	47		64
1365	100.44	100.79	47	47	46	47		64
1366	100.43	100.78	47	47	46	47		64
1367	100.42	100.83	47	47	46	47		64
1368	100.42	100.83	47	47	46	47		64
1369	100.5	100.92	46	46	46	47		64
1370	100.59	100.99	46	46	46	47		64
1371	100.55	101.01	46	46	46	47		64
1372	100.6	101	45	45	46	47		64
1373	100.66	101	46	46	45	48		64
1374	100.71	101.01	46	46	45	48		64
1375	100.77	101.08	46	46	45	48		64
1376	100.76	101.08	45	46	45	48		64
1377	100.73	101.08	45	49	45	48		64
1378	100.74	101.08	45	49	45	47		63
1379	100.71	101.07	45	48	44	47		63
1380	100.73	101.08	45	48	44	47		63
1381	100.72	101.04	45	48	45	47		63
1382	100.59	101	46	48	45	48		63
1383	100.54	101.03	46	48	45	48		63
1384	100.54	101.02	46	47	46	48		63
1385	100.6	100.97	47	48	48	48		63
1386	100.63	100.93	47	48	49	48		64
1387	100.65	100.93	48	49	51	49		64
1388	100.73	101.03	48	49	51	49		64
1389	100.91	101.21	48	49	51	49		64
1390	100.95	101.19	48	49	51	49		64
1391	100.99	101.3	47	48	50	49		64
1392	101.01	101.31	47	48	49	48		64
1393	101.11	101.35	47	48	47	48		64
1394	101.07	101.36	47	48	46	48		64
1395	101.09	101.42	47	47	46	48		64
1396	101.09	101.41	46	47	46	48		64
1397	101.13	101.44	46	47	46	47		64
1398	101.08	101.52	46	47	46	47		64
1399	101.18	101.54	47	47	46	47		64
1400	101.22	101.61	48	48	46	47		64
1401	101.2	101.66	47	47	47	47		64
1402	101.23	101.7	47	47	47	48		64
1403	101.16	101.68	46	46	47	48		64
1404	101.18	101.72	46	46	47	48		64
1405	101.13	101.64	47	47	47	48		64
1406	101.07	101.55	47	47	47	48		64
1407	101.06	101.48	47	47	47	49		64
1408	101.07	101.45	47	47	47	49		65
1409	101.03	101.3	47	47	47	49		65
1410	101.01	101.19	47	47	47	49		65
1411	101.04	100.97	48	48	47	48		65
1412	101.1	101.08	48	48	47	48		65
1413	101.1	101.06	48	48	48	48		65
1414	101.08	101.12	47	47	48	48		65
1415	101.07	101.13	47	47	47	48		65
1416	101.05	101.07	47	47	47	47		65
1417	100.99	101.12	48	48	47	47		65
1418	101.01	101.1	47	47	47	47		65
1419	101.04	101.12	46	47	47	47		65
1420	101.09	101.17	46	47	47	47		65
1421	101.04	101.2	46	46	47	48		65
1422	101.1	101.19	46	46	46	48		64
1423	101.11	101.21	46	46	45	48		64
1424	101.18	101.27	46	46	45	48		64
1425	101.16	101.4	46	46	45	48		64
1426	101.25	101.39	46	46	45	48		63
1427	101.25	101.44	46	46	46	48		63
1428	101.29	101.51	46	46	46	48		63
1429	101.3	101.64	46	46	47	48		63
1430	101.3	101.53	46	46	48	48		63
1431	101.3	101.62	47	47	50	49		63
1432	101.3	101.59	47	47	50	49		64
1433	101.27	101.51	47	47	50	49		64
1434	101.28	101.46	47	47	50	49		65
1435	101.24	101.35	47	47	50	49		65
1436	101.07	101.33	47	47	49	48		65
1437	101.03	101.26	47	47	48	48		65
1438	101.02	101.2	47	47	47	48		65
1439	101.07	101.25	47	47	47	48		65
1440	101.07	101.23	47	47	47	48		65
1441	101.05	101.26	47	47	47	48		65
1442	101.06	101.3	47	47	47	48		64
1443	101.07	101.34	47	47	46	48		64
1444	101.03	101.34	47	47	47	48		64
1445	101.04	101.41	46	46	46	49		64
1446	101.04	101.4	46	46	46	49		64
1447	101.07	101.42	46	46	46	49		64
1448	101.01	101.46	46	46	46	49		64
1449	101.09	101.48	46	46	45	49		64
1450	101.08	101.45	46	45	44	50		64
1451	101.15	101.49	45	45	44	50		64
1452	101.11	101.45	45	45	44	50		64
1453	101.09	101.4	46	46	44	50		64
1454	101.04	101.36	46	46	44	50		65
1455	100.96	101.28	46	46	45	49		65
1456	100.89	101.24	46	46	46	49		65
1457	100.89	101.23	45	45	46	49		65
1458	100.82	101.1	45	45	45	49		65
1459	100.77	101	45	45	45	49		65
1460	100.76	100.98	46	46	45	49		65
1461	100.8	100.98	45	46	45	49		65
1462	100.73	100.91	45	45	45	49		65
1463	100.7	100.88	45	46	45	49		65
1464	100.64	100.88	46	46	46	49		65
1465	100.64	100.87	46	46	46	49		65
1466	100.63	100.88	46	46	46	49		65
1467	100.64	100.88	46	46	46	49		65
1468	100.65	100.93	45	45	46	49		65
1469	100.69	100.91	45	45	46	49		65
1470	100.7	100.92	45	45	45	48		65
1471	100.7	100.94	45	45	45	48		65
1472	100.69	100.97	45	45	45	48		65
1473	100.72	100.94	45	45	45	48		65
1474	100.74	100.96	45	45	45	48		65
1475	100.73	100.97	45	45	45	48		65
1476	100.69	101.02	45	45	44	48		65
1477	100.71	101	44	44	43	48		65
1478	100.66	100.96	45	45	43	48		65
1479	100.66	100.94	45	45	43	48		65
1480	100.6	100.87	45	45	43	48		65
1481	100.61	100.89	45	45	44	48		65
1482	100.6	100.82	46	46	44	48		65
1483	100.56	100.78	46	46	45	48		65
1484	100.41	100.7	45	45	45	48		65
1485	100.4	100.65	45	45	45	48		65
1486	100.28	100.55	45	45	45	48		65
1487	100.22	100.57	45	45	45	48		65
1488	100.36	100.63	45	45	45	48		65
1489	100.36	100.5	46	46	45	48		65
1490	100.45	100.53	46	46	46	48		65
1491	100.45	100.61	46	46	47	48		65
1492	100.46	100.67	46	46	47	48		65
1493	100.44	100.69	46	46	46	48		65
1494	100.46	100.8	46	46	46	49		65
1495	100.48	100.87	46	46	46	49		65
1496	100.49	100.9	46	46	45	49		65
1497	100.44	100.91	45	45	45	49		65
1498	100.44	100.98	45	45	45	49		65
1499	100.42	100.92	46	46	45	49		65
1500	100.49	100.97	46	47	45	49		65
1501	100.48	100.97	47	47	45	49		65
1502	100.53	101	47	47	45	49		65
1503	100.49	101	46	46	46	49		65
1504	100.45	100.93	46	46	46	52		65
1505	100.42	100.89	46	46	46	52		65
1506	100.39	100.77	46	46	46	52		66
1507	100.26	100.72	47	47	46	52		66
1508	100.18	100.61	48	48	46	52		66
1509	100.07	100.5	48	48	47	52		66
1510	99.99	100.4	48	48	48	52		66
1511	99.97	100.29	47	47	48	52		66
1512	99.95	100.29	47	47	48	52		66
1513	99.93	100.24	48	48	48	52		66
1514	99.93	100.21	48	48	48	52		67
1515	99.92	100.21	48	48	48	52		67
1516	99.88	100.19	48	48	48	52		67
1517	99.9	100.19	48	48	48	52		67
1518	99.9	100.18	48	48	48	51		66
1519	99.9	100.17	48	48	48	51		66
1520	99.92	100.18	48	48	48	51		67
1521	99.9	100.19	48	48	48	51		67
1522	99.92	100.17	48	48	48	51		67
1523	99.94	100.19	48	48	48	51		67
1524	99.94	100.22	48	48	48	51		67
1525	99.97	100.27	48	48	47	51		67
1526	99.93	100.3	48	48	47	51		67
1527	99.95	100.29	47	47	47	51		67
1528	99.97	100.35	48	48	47	51		67
1529	99.99	100.37	48	48	47	51		67
1530	99.99	100.37	48	48	47	51		66
1531	99.94	100.37	48	48	47	51		66
1532	99.97	100.37	48	48	48	51		67
1533	99.97	100.36	48	48	49	51		67
1534	99.97	100.34	48	48	49	51		66
1535	99.96	100.33	48	48	49	51		66
1536	99.96	100.3	47	47	48	51		66
1537	99.96	100.32	47	47	48	51		66
1538	100.02	100.35	48	48	47	50		66
1539	100.05	100.37	48	48	47	50		66
1540	100.03	100.41	48	48	48	50		66
1541	100.02	100.4	48	48	48	50		66
1542	100.05	100.43	49	49	48	50		66
1543	100.05	100.43	48	48	49	50		66
1544	100.01	100.42	48	48	49	50		66
1545	100.01	100.4	48	48	49	50		66
1546	99.97	100.39	48	48	49	50		66
1547	100	100.4	48	48	48	51		66
1548	100	100.39	48	48	48	51		66
1549	100.01	100.39	48	48	47	51		66
1550	100.05	100.44	48	48	47	51		66
1551	100.03	100.45	48	48	47	51		66
1552	100.1	100.52	48	48	47	51		66
1553	100.12	100.56	48	48	48	51		66
1554	100.16	100.6	48	47	48	51		66
1555	100.21	100.67	47	47	48	51		66
1556	100.19	100.64	48	48	49	51		66
1557	100.24	100.66	50	50	51	52		66
1558	100.24	100.7	50	50	54	52		67
1559	100.28	100.7	50	50	54	52		67
1560	100.23	100.66	50	49	54	52		67
1561	100.19	100.66	50	49	54	52		67
1562	100.14	100.53	49	49	53	53		67
1563	100.13	100.47	49	49	52	53		67
1564	100.02	100.38	50	50	51	53		67
1565	99.94	100.28	50	50	51	53		67
1566	99.91	100.24	50	50	51	53		67
1567	99.91	100.23	50	50	51	52		67
1568	99.89	100.21	50	50	51	52		67
1569	99.86	100.22	50	50	51	52		67
1570	99.88	100.21	50	50	51	52		67
1571	99.87	100.2	50	50	51	52		67
1572	99.9	100.23	50	50	51	51		67
1573	99.92	100.27	51	51	51	51		67
1574	99.95	100.31	51	51	51	51		67
1575	99.93	100.37	50	50	51	51		67
1576	99.97	100.35	50	50	50	52		67
1577	99.98	100.36	51	51	50	52		67
1578	99.98	100.35	51	51	50	52		67
1579	99.98	100.35	50	50	50	52		67
1580	99.93	100.32	50	50	51	52		67
1581	99.86	100.27	50	50	51	52		67
1582	99.86	100.22	51	51	51	52		67
1583	99.84	100.22	51	51	51	52		67
1584	99.81	100.17	51	51	51	52		67
1585	99.81	100.14	51	51	51	52		67
1586	99.79	100.11	52	52	51	53		67
1587	99.78	100.1	52	51	52	53		67
1588	99.78	100.07	52	51	52	53		68
1589	99.76	100.05	51	51	52	53		68
1590	99.73	100.03	50	51	52	53		68
1591	99.72	100	50	50	51	54		68
1592	99.74	99.99	50	50	50	54		67
1593	99.77	100.02	50	50	50	54		67
1594	99.77	100.08	50	50	50	54		67
1595	99.74	100.07	51	51	50	54		67
1596	99.77	100.08	51	51	51	54		67
1597	99.78	100.11	50	51	51	54		67
1598	99.78	100.11	51	51	50	54		67
1599	99.75	100.1	51	51	50	54		67
1600	99.83	100.45	51	51	51	54		67
1601	99.8	100.66	51	51	51	54		67
1602	99.8	100.68	51	51	51	54		67
1603	99.72	100.83	51	51	51	54		67
1604	99.64	100.8	51	51	51	54		67
1605	99.54	100.64	51	51	52	55		67
1606	99.5	100.42	52	53	52	55		68
1607	99.51	100.31	54	54	53	55		68
1608	99.53	100.22	55	55	55	55		69
1609	99.55	100.16	54	54	59	55		69
1610	99.54	100.08	55	55	59	56		69
1611	99.51	100.02	56	56	59	56		69
1612	99.5	99.97	56	56	59	56		69
1613	99.48	99.9	56	56	59	56		69
1614	99.46	99.88	57	57	59	56		69
1615	99.44	99.79	57	57	59	56		69
1616	99.45	99.76	57	57	59	56		69
1617	99.45	99.73	58	58	59	56		69
1618	99.46	99.76	59	59	59	56		69
1619	99.52	99.79	60	60	59	56		69
1620	99.58	99.79	60	60	60	55		69
1621	99.63	99.88	60	60	61	55		69
1622	99.7	99.95	61	61	63	55		69
1623	99.74	99.99	62	62	64	55		69
1624	99.76	100.04	63	63	64	55		69
1625	99.79	100.09	63	63	64	55		69
1626	99.86	100.16	62	62	64	55		69
1627	99.9	100.22	63	63	64	55		69
1628	99.97	100.27	64	64	64	55		68
1629	100.04	100.32	63	63	64	54		68
1630	100.07	100.37	63	62	64	54		69
1631	100.08	100.39	62	62	64	54		69
1632	100.1	100.41	62	62	64	54		70
1633	100.08	100.41	63	63	63	54		70
1634	100.12	100.45	62	62	62	55		70
1635	100.13	100.48	62	62	62	55		70
1636	100.13	100.46	62	62	61	55		70
1637	100.12	100.45	62	62	61	55		70
1638	100.12	100.43	63	63	61	55		70
1639	100.12	100.42	62	62	61	55		70
1640	100.12	100.43	61	61	61	55		70
1641	100.14	100.39	60	60	61	55		70
1642	100.15	100.4	60	60	61	55		69
1643	100.16	100.4	59	59	61	55		69
1644	100.14	100.3	59	59	60	54		69
1645	100.13	100.21	58	58	59	54		69
1646	100.14	100.23	57	57	57	54		69
1647	100.14	100.24	57	57	53	54		69
1648	100.18	100.28	58	58	53	54		69
1649	100.17	100.31	57	57	54	53		69
1650	100.13	100.31	55	57	54	53		69
1651	100.08	100.3	55	55	54	53		69
1652	100.02	100.25	56	56	54	53		68
1653	99.97	100.19	56	56	54	53		68
1654	99.91	100.13	55	55	54	54		68
1655	99.86	100.11	54	54	53	54		68
1656	99.78	100.03	54	54	52	54		68
1657	99.72	99.97	55	55	52	54		68
1658	99.72	99.92	54	54	53	54		68
1659	99.7	99.9	54	54	53	54		68
1660	99.7	99.9	53	53	53	54		69
1661	99.7	99.91	53	54	53	54		69
1662	99.68	99.93	54	54	53	54		68
1663	99.73	100.01	54	54	53	54		68
1664	99.7	99.95	54	54	53	54		68
1665	99.74	99.99	53	53	53	54		68
1666	99.74	99.99	53	53	53	54		68
1667	99.73	99.97	53	53	53	54		68
1668	99.72	99.96	54	53	53	54		68
1669	99.71	99.96	54	53	53	54		68
1670	99.75	99.97	53	53	53	54		68
1671	99.66	99.94	52	52	52	54		68
1672	99.67	99.93	52	52	52	54		67
1673	99.58	99.88	52	52	51	53		67
1674	99.46	99.77	53	53	51	53		67
1675	99.28	99.59	52	52	51	53		67
1676	99.14	99.44	52	52	52	53		67
1677	99.14	99.31	52	52	52	53		67
1678	98.96	99.18	52	52	51	55		67
1679	98.78	99.13	51	51	51	55		67
1680	98.67	99.01	51	51	51	55		67
1681	98.58	98.96	51	51	51	55		67
1682	98.55	98.93	52	52	51	55		67
1683	98.57	98.94	52	52	51	56		67
1684	98.54	98.93	51	51	51	56		67
1685	98.55	98.92	50	50	51	56		67
1686	98.52	98.9	50	50	51	56		67
1687	98.5	98.84	50	50	50	56		67
1688	98.53	98.79	50	50	49	56		68
1689	98.49	98.79	49	49	48	56		68
1690	98.54	98.79	49	50	48	56		68
1691	98.57	98.79	50	50	48	56		68
1692	98.59	98.81	50	50	48	55		67
1693	98.59	98.82	50	49	49	55		67
1694	98.61	98.85	49	49	50	55		68
1695	98.59	98.84	50	50	50	55		68
1696	98.59	98.87	50	50	50	55		68
1697	98.55	98.85	50	50	50	55		68
1698	98.47	98.78	49	49	50	55		67
1699	98.4	98.73	49	49	50	55		67
1700	98.35	98.68	49	49	49	55		68
1701	98.34	98.61	50	50	50	55		68
1702	98.23	98.59	52	52	50	56		68
1703	98.25	98.59	51	51	50	56		68
1704	98.21	98.55	51	51	51	56		68
1705	98.17	98.49	51	51	51	56		68
1706	98.12	98.43	51	51	51	56		68
1707	98.09	98.37	51	51	51	56		68
1708	98.07	98.33	51	51	51	56		69
1709	98.09	98.33	51	51	51	56		69
1710	98.09	98.32	52	51	51	56		68
1711	98.09	98.3	52	52	52	56		68
1712	98.1	98.28	52	53	53	55		68
1713	98.1	98.28	53	53	54	55		68
1714	98.11	98.26	53	53	54	55		69
1715	98.13	98.27	53	53	54	55		69
1716	98.15	98.29	54	55	54	55		68
1717	98.16	98.31	55	55	54	54		68
1718	98.2	98.31	55	55	55	54		68
1719	98.21	98.37	54	54	56	54		68
1720	98.21	98.36	54	54	56	54		68
1721	98.22	98.37	55	55	56	53		68
1722	98.23	98.38	54	54	55	53		67
1723	98.24	98.38	53	53	55	53		67
1724	98.24	98.39	53	53	54	53		66
1725	98.24	98.38	53	53	52	53		66
1726	98.28	98.39	53	53	50	53		66
1727	98.24	98.42	52	52	50	53		66
1728	98.33	98.42	52	52	50	53		66
1729	98.32	98.41	52	52	50	53		66
1730	98.25	98.34	52	52	51	53		66
1731	98.14	98.02	52	52	52	54		66
1732	98.02	98.02	52	52	52	54		66
1733	97.87	97.87	52	52	51	54		66
1734	97.79	97.75	52	51	51	54		66
1735	97.66	97.73	51	51	51	54		66
1736	97.47	97.57	52	51	50	54		67
1737	97.32	97.57	52	51	51	54		67
1738	97.2	97.33	52	52	51	54		67
1739	97.11	97.33	52	52	51	54		67
1740	97.06	97.17	52	51	51	54		68
1741	96.99	97.17	52	51	52	55		68
1742	96.96	97.04	52	52	53	55		68
1743	96.89	97.01	52	52	54	55		68
1744	96.82	96.96	52	52	54	55		68
1745	96.74	96.96	52	52	54	55		68
1746	96.69	96.62	52	52	53	53		68
1747	96.69	96.69	52	52	53	53		68
1748	96.72	96.74	52	52	52	53		68
1749	96.69	96.73	52	52	52	53		68
1750	96.68	96.77	52	52	52	53		68
1751	96.67	96.77	53	52	52	52		68
1752	96.66	96.78	53	52	52	52		67
1753	96.66	96.78	52	52	53	52		67
1754	96.67	96.77	52	52	53	52		65
1755	96.67	96.77	52	52	53	52		65
1756	96.66	96.78	52	52	52	52		66
1757	96.66	96.75	52	52	52	52		66
1758	96.61	96.75	52	52	51	52		65
1759	96.51	96.66	52	52	51	52		65
1760	96.36	96.66	52	52	51	51		66
1761	96.2	96.35	51	51	51	51		66
1762	96.01	96.13	51	51	51	51		66
1763	95.8	95.91	52	52	51	51		66
1764	95.72	95.91	52	52	52	51		66
1765	95.57	95.68	52	52	52	52		66
1766	95.57	95.35	52	52	53	52		66
1767	95.16	95.13	52	52	53	52		66
1768	94.97	95.13	52	52	52	52		66
1769	94.82	94.98	52	52	52	52		66
1770	94.71	94.66	52	52	52	53		66
1771	94.58	94.58	52	52	52	53		66
1772	94.57	94.48	53	53	53	53		66
1773	94.48	94.48	52	53	53	53		66
1774	94.4	94.35	51	51	53	53		66
1775	94.3	94.22	51	51	53	52		66
1776	94.23	94.12	51	51	52	52		66
1777	94.23	94.07	51	51	52	52		66
1778	94.17	94.07	51	51	51	52		66
1779	94.07	93.96	51	51	51	52		66
1780	93.97	93.87	51	51	51	50		65
1781	93.94	93.81	51	51	51	50		65
1782	93.87	93.81	51	51	51	50		64
1783	93.83	93.75	51	51	51	50		64
1784	93.82	93.7	51	51	51	50		64
1785	93.8	93.58	51	51	51	49		64
1786	93.66	93.53	51	51	51	49		63
1787	93.53	93.53	51	51	51	49		63
1788	93.4	93.4	51	51	51	49		63
1789	93.29	93.16	52	51	51	50		63
1790	93.19	93.04	52	51	51	50		63
1791	93.14	93.04	51	51	51	50		63
1792	93.03	92.94	51	51	51	50		63
1793	92.91	92.92	50	51	50	50		63
1794	92.79	92.58	50	50	49	50		63
1795	92.68	92.39	51	51	49	50		63
1796	92.68	92.39	51	51	49	50		63
1797	92.49	92.26	51	51	50	50		63
1798	92.46	92.17	51	51	50	50		63
1799	92.29	92.13	52	51	51	49		63
1800	92.16	91.95	52	52	53	49		63
1801	92.08	91.81	52	53	53	49		63
1802	91.99	91.62	51	51	53	49		63
1803	91.88	91.48	51	51	53	49		63
1804	91.8	91.48	51	51	53	49		63
1805	91.68	91.38	52	52	53	49		63
1806	91.67	91.29	52	52	53	49		63
1807	91.58	91.19	52	52	53	49		63
1808	91.51	91.1	52	52	53	49		63
1809	91.51	91.1	52	52	53	47		63
1810	91.42	91.04	53	52	53	47		62
1811	91.42	91	53	53	53	47		62
1812	91.47	91.07	54	54	53	47		62
1813	91.5	91.08	54	54	54	47		62
1814	91.5	91.09	54	54	55	46		62
1815	91.52	91.09	55	54	57	46		62
1816	91.49	91.07	57	55	61	46		61
1817	91.47	91.1	57	56	60	46		61
1818	91.52	91.12	56	56	60	46		61
1819	91.46	91.12	55	56	60	48		61
1820	91.43	91.09	55	55	60	48		62
1821	91.31	90.88	55	55	59	48		62
1822	91.21	90.7	55	55	57	48		62
1823	91.07	90.7	54	55	54	48		62
1824	90.94	90.59	55	54	54	48		61
1825	90.81	90.3	54	54	54	48		61
1826	90.64	90.05	54	54	54	48		62
1827	90.51	90.05	53	54	54	48		62
1828	90.46	89.94	54	54	53	49		62
1829	90.26	89.78	54	54	53	49		62
1830	90.08	89.43	53	53	52	49		62
1831	90.08	89.43	53	53	52	49		62
1832	89.75	89.21	53	53	52	49		62
1833	89.65	89.09	53	53	52	49		62
1834	89.64	88.99	52	52	52	49		63
1835	89.57	88.86	52	52	52	49		63
1836	89.57	88.86	52	52	52	49		62
1837	89.69	88.88	53	53	52	49		62
1838	89.67	89.01	52	53	52	48		62
1839	89.63	89.03	53	53	52	48		62
1840	89.58	88.99	53	53	53	48		62
1841	89.58	88.99	53	53	53	48		62
1842	89.56	88.94	52	52	53	48		62
1843	89.51	88.92	52	52	53	47		62
1844	89.54	88.98	52	53	53	47		62
1845	89.55	88.98	52	52	53	47		62
1846	89.55	88.98	52	52	53	47		62
1847	89.46	88.91	53	53	53	47		62
1848	89.37	88.83	53	54	54	47		62
1849	89.28	88.62	53	53	54	47		62
1850	89.28	88.62	53	53	54	47		62
1851	89.06	88.48	53	53	54	47		62
1852	88.96	88.35	53	53	54	47		61
1853	89.02	88.29	53	53	53	47		61
1854	89.02	88.17	53	53	52	47		62
1855	88.89	88.17	53	53	52	47		62
1856	88.77	88.06	53	53	52	47		62
1857	88.57	87.98	53	53	53	46		62
1858	88.57	87.67	53	53	53	46		62
1859	88.47	87.57	53	53	53	46		62
1860	88.35	87.53	53	53	52	46		62
1861	88.34	87.53	53	53	52	46		62
1862	88.23	87.39	53	53	52	45		61
1863	88.23	87.39	53	53	52	45		61
1864	88.09	87.35	54	54	53	45		61
1865	88.03	87.31	53	54	53	45		61
1866	87.96	87.25	53	53	54	45		61
1867	87.89	87.09	54	54	54	45		61
1868	87.89	87.09	54	54	55	45		61
1869	87.82	87.04	54	54	55	45		61
1870	87.8	87.01	54	54	55	45		60
1871	87.77	87.01	53	54	55	45		60
1872	87.77	86.91	53	53	54	43		60
1873	87.71	86.91	53	53	54	43		60
1874	87.74	86.92	55	54	54	43		60
1875	87.8	87.05	55	55	54	43		60
1876	87.84	87.14	54	55	55	43		59
1877	87.84	87.2	54	54	55	44		59
1878	87.93	87.2	54	54	55	44		59
1879	88.02	87.25	54	54	55	44		59
1880	88.08	87.28	53	54	55	44		59
1881	88.08	87.2	53	53	54	44		59
1882	88.07	87.2	53	53	53	43		59
1883	87.92	87.15	54	54	53	43		59
1884	87.73	86.98	53	54	53	43		59
1885	87.73	86.73	53	53	53	43		59
1886	87.55	86.57	53	53	53	43		59
1887	87.33	86.57	53	53	53	44		59
1888	87.29	86.34	53	53	53	44		59
1889	87.26	86.33	53	53	52	44		59
1890	87.26	86.2	53	53	52	44		59
1891	87.2	86.12	54	54	52	45		59
1892	86.91	86.04	54	54	53	45		59
1893	86.77	85.93	53	54	53	45		59
1894	86.77	85.75	53	53	54	45		59
1895	86.64	85.59	54	54	56	45		59
1896	86.5	85.43	55	55	58	45		59
1897	86.2	85.27	55	56	58	45		59
1898	86.06	85.1	55	55	58	45		60
1899	86.06	84.94	55	55	58	45		60
1900	85.93	84.79	56	56	58	45		60
1901	85.74	84.67	58	57	58	43		60
1902	85.7	84.59	59	58	58	43		60
1903	85.66	84.53	59	59	59	43		60
1904	85.66	84.51	59	59	60	43		59
1905	85.64	84.49	61	61	62	43		59
1906	85.58	84.43	64	63	66	44		59
1907	85.53	84.38	65	64	72	44		59
1908	85.53	84.33	65	65	72	44		59
1909	85.51	84.3	64	64	72	44		59
1910	85.42	84.27	63	63	71	44		59
1911	85.38	84.23	64	63	70	44		59
1912	85.38	84.19	64	64	68	44		58
1913	85.36	84.2	65	65	65	44		58
1914	85.33	84.19	63	64	64	44		59
1915	85.33	83.97	63	63	61	44		59
1916	85.18	83.74	62	62	59	44		58
1917	84.99	83.59	62	62	59	44		58
1918	84.69	83.5	63	63	59	44		59
1919	84.51	83.36	62	63	60	44		59
1920	84.51	83.07	62	62	61	44		58
1921	84.24	82.68	61	61	61	44		58
1922	83.98	82.43	61	61	60	44		59
1923	83.74	82.28	62	62	61	44		59
1924	83.75	82.25	61	62	61	44		59
1925	83.75	82.33	61	61	61	44		59
1926	83.79	82.33	60	60	60	44		59
1927	83.79	82.28	61	61	61	44		59
1928	83.85	82.41	62	62	61	44		59
1929	83.85	82.49	62	62	61	44		59
1930	83.88	82.48	62	62	61	45		59
1931	83.93	82.48	61	61	61	45		59
1932	84	82.51	62	62	61	45		59
1933	84	82.53	61	62	61	45		59
1934	84.04	82.68	60	61	61	45		59
1935	84.04	82.57	60	60	60	46		59
1936	84.1	82.61	60	60	59	46		60
1937	84	82.46	60	60	58	46		60
1938	84	82.34	60	60	58	46		60
1939	83.9	82.29	59	59	58	46		60
1940	83.87	82.31	59	59	58	45		60
1941	83.84	82.26	60	60	58	45		60
1942	83.84	82.23	60	60	58	45		60
1943	83.83	82.26	59	59	59	45		60
1944	83.76	82.13	58	58	59	45		60
1945	83.63	81.94	59	59	59	45		60
1946	83.52	81.87	60	60	59	45		59
1947	83.5	81.89	60	60	59	45		59
1948	83.46	81.84	59	59	59	45		59
1949	83.33	81.77	59	58	59	45		59
1950	83.31	81.76	60	59	59	45		59
1951	83.31	81.76	60	60	59	45		59
1952	83.34	81.81	59	59	59	45		59
1953	83.33	81.74	58	58	59	45		59
1954	83.16	81.59	59	58	59	44		59
1955	83.11	81.49	60	59	59	44		59
1956	83.11	81.48	60	60	59	44		60
1957	83.08	81.49	59	59	59	44		60
1958	83.04	81.44	58	58	59	44		59
1959	82.97	81.35	59	58	59	45		59
1960	82.97	81.28	59	59	59	45		59
1961	82.93	81.28	60	60	59	45		59
1962	82.93	81.35	59	59	59	45		59
1963	82.93	81.39	59	59	59	45		59
1964	82.94	81.39	59	58	59	44		59
1965	82.94	81.39	59	59	59	44		59
1966	82.97	81.4	59	59	58	44		59
1967	83.04	81.43	59	58	57	44		59
1968	83.18	81.55	58	58	55	44		59
1969	83.18	81.7	58	58	55	43		59
1970	83.22	81.73	57	57	55	43		59
1971	83.31	81.83	58	58	55	43		59
1972	83.37	81.76	57	58	55	43		57
1973	83.37	81.76	57	57	56	43		57
1974	83.32	81.63	57	57	56	43		58
1975	83.24	81.48	57	57	56	43		58
1976	83.19	81.45	57	57	57	43		58
1977	83.19	81.59	57	57	57	43		58
1978	83.22	81.62	57	57	58	43		58
1979	83.18	81.48	58	58	60	43		58
1980	83.1	81.33	59	59	60	43		58
1981	82.84	81.19	57	58	60	43		58
1982	82.84	81.01	57	57	60	43		58
1983	82.69	80.78	58	58	59	43		58
1984	82.53	80.6	59	59	59	43		58
1985	82.35	80.42	58	59	59	43		58
1986	82.16	80.16	58	58	59	43		58
1987	81.98	79.95	58	58	59	43		58
1988	81.81	79.77	58	58	59	42		58
1989	81.67	79.62	59	59	59	42		58
1990	81.56	79.52	59	59	60	42		58
1991	81.48	79.44	59	59	60	42		58
1992	81.43	79.36	59	59	61	42		58
1993	81.38	79.28	60	60	63	41		58
1994	81.36	79.22	62	62	67	41		58
1995	81.34	79.21	61	62	67	41		58
1996	81.34	79.35	61	61	67	41		57
1997	81.47	79.68	62	62	67	41		57
1998	81.76	80.12	63	63	66	42		57
1999	82.02	80.15	63	63	65	42		57
[truncated: 939 more rows]
