# Supplementary material for: Detection of critical cerebral desaturation thresholds by three regional oximeters during hypoxia: a pilot study in healthy volunteers
Source: BMC Anesthesiol. 2017 Jan 13;17:6. doi: 10.1186/s12871-016-0298-7 (PMC5234256; doi:10.1186/s12871-016-0298-7)
Supplement: Additional file 3: — Raw data subject #1654. (XLSX 174 kb) [file 12871_2016_298_MOESM3_ESM.xlsx]

## Sheet: Sheet1
Time in sec	Ch1 SpO2	Ch2 SpO2	Ch1 PR	Ch2 PR	ECG HR	Invos_rSO2	equanox_rSO2	foresight_rSO2
1	96.05	95.33	58	58	58
2	96.07	95.39	58	58	57
3	96.1	95.44	58	58	57
4	96.11	95.47	58	58	57
5	96.11	95.49	58	58	57
6	96.13	95.5	58	58	57
7	96.16	95.52	58	58	58	64	68
8	96.2	95.56	58	58	59	64	68
9	96.24	95.59	59	59	59	64	68
10	96.29	95.63	58	58	59	64	69
11	96.28	95.61	58	58	59	64	69
12	96.22	95.56	58	58	58	64	69
13	96.18	95.52	58	58	58	64	69
14	96.12	95.46	58	58	58	64	69
15	96.06	95.39	58	59	58	64	69
16	95.99	95.34	59	59	58	64	69
17	95.89	95.08	60	60	58	64	69
18	95.84	94.99	59	59	59	64	69
19	95.77	94.96	59	59	60	64	69
20	95.72	94.93	59	59	59	64	69
21	95.69	94.92	59	59	59	64	69
22	95.65	94.91	59	59	59	64	69
23	95.62	94.87	59	59	59	64	69
24	95.59	94.85	59	59	58	64	69
25	95.55	94.85	59	59	58	64	69
26	95.51	94.81	59	59	58	63	69
27	95.55	94.73	58	58	58	63	69
28	95.56	94.74	59	59	58	63	69
29	95.56	94.78	59	59	58	63	69
30	95.54	94.79	59	59	59	63	69
31	95.53	94.82	59	59	59	63	69
32	95.47	94.84	61	61	59	63	69
33	95.41	94.8	63	63	60	63	69
34	95.45	94.83	64	64	62	63	69
35	95.52	94.87	64	64	66	64	69
36	95.57	94.94	62	62	66	64	69
37	95.54	94.88	60	60	66	64	69
38	95.5	94.82	60	59	65	64	69
39	95.5	94.76	59	59	64	64	69
40	95.45	94.66	58	58	62	63	69
41	95.5	94.59	58	58	58	63	69
42	95.64	94.71	58	58	58	63	69
43	95.86	94.94	58	58	58	63	70
44	96.07	95.15	59	59	58	63	70
45	96.28	95.34	59	59	58	63	70
46	96.4	95.46	60	60	59	63	70
47	96.41	95.49	59	59	60	63	70
48	96.4	95.54	59	58	60	63	70
49	96.4	95.58	58	59	59	63	70
50	96.36	95.65	58	58	59	64	70
51	96.45	95.82	58	58	59	64	69
52	96.65	96.01	58	58	58	64	69
53	96.78	96.19	58	58	57	64	69
54	96.92	96.33	58	58	57	64	69
55	97.02	96.4	58	58	57	63	69
56	97.08	96.45	58	58	57	63	69
57	97.12	96.48	58	58	58	63	68
58	97.13	96.49	58	58	58	63	68
59	97.05	96.49	58	58	58	63	68
60	96.98	96.44	58	58	58	64	68
61	96.8	96.38	58	58	59	64	68
62	96.69	96.34	59	59	59	64	68
63	96.55	96.22	59	59	61	64	68
64	96.42	96.08	60	60	62	64	68
65	96.23	95.92	60	60	62	64	69
66	96.12	95.78	59	59	62	64	69
67	96.04	95.7	60	59	62	64	69
68	95.99	95.65	59	59	61	64	70
69	95.96	95.61	59	57	61	64	70
70	95.96	95.57	57	57	60	64
71	95.92	95.52	57	57	58	64
72	95.99	95.44	56	56	54	64
73	95.96	95.46	56	56	54	64
74	95.93	95.41	57	57	54	63
75	95.91	95.37	57	57	54	63
76	95.86	95.3	57	57	55	63
77	95.83	95.29	58	58	56	63
78	95.81	95.24	59	61	58	63
79	95.77	95.24	62	62	62	64
80	95.82	95.28	62	62	66	64
81	95.84	95.3	62	60	66	64
82	95.87	95.35	60	60	65	64
83	95.87	95.39	59	59	65	64
84	95.94	95.37	59	59	64	65
85	96.05	95.51	58	58	63	65
86	96.13	95.56	58	58	60	65
87	96.11	95.52	59	59	57	65
88	96.08	95.48	59	59	58	64
89	96.06	95.45	59	59	58	64
90	96.02	95.39	58	58	58	64
91	95.95	95.31	57	57	58	64
92	96.11	95.3	56	56	58	64
93	96.23	95.38	55	55	57	62
94	96.27	95.46	55	55	57	62
95	96.29	95.5	55	55	56	62
96	96.28	95.52	55	55	54	62
97	96.27	95.53	55	55	54	62
98	96.21	95.53	56	56	54	63
99	96.17	95.52	55	55	54	63
100	96.08	95.48	55	55	55	63
101	95.97	95.45	55	55	55	63
102	95.85	95.41	56	56	55	63
103	95.75	95.3	56	56	55	64
104	95.61	95.2	57	57	55	64
105	95.49	95.09	57	57	56	64
106	95.37	94.96	58	58	57	64
107	95.27	94.81	58	58	59	64
108	95.22	94.7	58	58	60	66
109	95.21	94.65	58	58	60	66
110	95.2	94.62	58	58	60	66
111	95.21	94.6	57	57	60	66
112	95.23	94.61	57	57	59	65
113	95.25	94.62	57	57	58	65
114	95.32	94.71	57	57	56	65
115	95.38	94.79	57	57	56	65
116	95.46	94.84	57	57	56	65
117	95.53	94.9	57	58	57	65
118	95.62	95.02	58	58	57	64
119	95.63	95.08	57	57	57	64
120	95.7	95.12	56	57	57	64
121	95.74	95.18	56	56	56	64
122	95.75	95.21	56	56	56	63
123	95.71	95.19	56	56	55	63
124	95.59	94.9	57	57	55	63
125	95.63	94.9	58	58	55	63
126	95.62	94.93	58	58	56	63
127	95.64	94.98	59	59	56	64
128	95.66	94.99	59	59	57	64
129	95.73	95.08	58	58	59	64
130	95.81	95.2	57	57	59	64
131	95.91	95.29	57	57	59	64
132	95.67	95.35	56	56	59	64	70
133	95.67	95.46	56	56	58	64	70
134	95.76	95.52	56	56	57	64	70
135	95.77	95.46	55	55	55	64	70
136	95.89	95.49	54	54	52	64	70
137	95.9	95.44	55	55	52	63	70
138	95.87	95.37	56	56	52	63	71
139	95.86	95.37	57	57	52	63	71
140	95.86	95.32	56	56	53	63	71
141	95.81	95.27	55	55	54	64	71
142	95.77	95.23	55	53	54	64	74
143	95.73	95.2	53	53	54	64	74
144	95.73	95.18	52	52	53	64	74
145	95.68	95.14	53	53	52	64	73
146	95.64	95.09	53	53	51	64	73
147	95.59	95.04	53	53	51	64	73
148	95.59	95.03	54	54	51	64	74
149	95.61	95	54	54	51	64	74
150	95.69	94.99	54	55	52	64	74
151	95.76	95.05	54	54	53	64	73
152	95.81	95.11	54	55	55	64	73
153	95.86	95.16	54	55	55	63	73
154	95.9	95.2	54	54	55	63	73
155	95.91	95.18	54	54	54	63	73
156	95.92	95.21	55	55	54	63	73
157	95.93	95.26	55	55	54	63	73
158	95.92	95.29	55	55	54	63	73
159	95.89	95.26	55	55	55	63	73
160	95.86	95.27	55	55	55	63	73
161	95.83	95.26	56	56	56	63	73
162	95.81	95.26	56	56	58	63	73
163	95.77	95.24	56	56	59	63	73
164	95.73	95.22	56	56	59	63	74
165	95.69	95.19	56	56	58	63	74
166	95.65	95.15	56	56	58	63	74
167	95.62	95.12	56	56	58	64	73
168	95.57	95.08	56	56	57	64	73
169	95.53	95.05	56	56	56	64	73
170	95.52	94.99	56	56	56	64	72
171	95.48	94.96	56	56	56	64	71
172	95.5	94.92	56	56	56	63	71
173	95.49	94.93	57	57	57	63	71
174	95.47	94.94	57	57	58	63	71
175	95.46	94.88	57	57	59	63	71
176	95.46	94.95	57	57	59	63	72
177	95.4	94.94	58	58	59	64	72
178	95.35	94.92	58	58	59	64	72
179	95.3	94.83	58	58	59	64	72
180	95.28	94.81	58	58	58	64	72
181	95.26	94.75	58	58	58	64	72
182	95.27	94.74	58	58	58	64	72
183	95.28	94.76	58	58	58	64	72
184	95.31	94.8	59	59	58	64	73
185	95.35	94.85	59	59	59	64	73
186	95.38	94.88	59	59	60	63	73
187	95.38	94.9	59	59	60	63	73
188	95.4	94.93	59	59	60	63	73
189	95.43	94.96	59	59	60	63	73
190	95.43	94.97	59	59	60	63	73
191	95.45	94.99	59	59	60	0	73
192	95.47	95	59	59	59	0	72
193	95.47	95.02	60	60	59	0	72
194	95.49	95.03	60	60	60	0	72
195	95.51	95.05	60	60	60	0	72
196	95.51	95.05	60	60	60	0	72
197	95.49	95.03	60	60	61	0	72
198	95.49	95	60	60	61	0	72
199	95.48	94.97	60	60	61	0	72
200	95.46	94.95	60	60	61	0	72
201	95.44	94.91	60	60	61	0	72
202	95.42	94.88	60	60	61	0	72
203	95.39	94.86	60	60	61	0	72
204	95.42	94.93	61	61	61	0	72
205	95.41	94.96	61	61	61	0	72
206	95.39	94.93	62	62	61	0	72
207	95.41	94.91	63	63	62	0	72
208	95.43	94.91	62	62	63	0	72
209	95.46	94.93	62	62	63	0	71
210	95.48	94.91	63	63	63	0	71
211	95.57	94.93	63	63	63	0	71
212	95.54	94.95	63	63	63	0	71
213	95.59	95.01	65	65	63	0	71
214	95.68	95.1	65	65	64	0	70
215	95.78	95.2	65	65	64	0	70
216	95.86	95.33	65	65	65	0	70
217	95.93	95.42	64	64	65	0	69
218	96.01	95.52	63	63	65	0	69
219	96.12	95.59	62	62	65	0	69
220	96.23	95.69	62	62	64	0	69
221	96.32	95.87	62	62	63	0	69
222	96.45	95.96	62	62	61	0	69
223	96.52	95.98	62	62	61	0	69
224	96.57	95.99	62	62	61	0	69
225	96.61	96.01	61	61	61	0	69
226	96.6	96.03	60	60	61	0	69
227	96.56	96.01	60	60	60	0	69
228	96.48	95.98	59	60	59	0	69
229	96.4	95.92	60	60	58	0	70
230	96.32	95.86	60	60	58	0	70
231	96.22	95.8	60	60	58	0	70
232	96.1	95.68	60	60	58	0	70
233	96	95.57	60	60	59	0	70
234	95.9	95.5	60	60	60	0	70
235	95.79	95.4	60	60	60	0	70
236	95.69	95.26	59	60	59	0	71
237	95.59	95.13	59	59	59	0	71
238	95.53	95.05	59	59	59	0	71
239	95.47	95.03	59	59	58	0	71
240	95.44	95.01	59	59	59	0	71
241	95.42	95	60	60	59	0	71
242	95.4	94.96	60	60	59	0	72
243	95.42	94.96	60	60	59	0	72
244	95.44	94.96	61	61	60	0	72
245	95.44	94.95	61	61	62	0	72
246	95.48	94.96	62	62	64	0	72
247	95.5	94.99	62	62	65	0	72
248	95.6	95.05	63	63	65	0	72
249	95.68	95.09	63	63	65	0	72
250	95.75	95.12	62	63	65	0	71
251	95.79	95.14	62	62	65	0	71
252	95.78	95	62	61	65	0	71
253	95.76	94.97	61	61	64	0	69
254	95.68	94.96	60	60	62	0	69
255	95.6	94.89	60	60	58	0	69
256	95.5	94.84	60	60	58	0	70
257	95.45	94.8	60	60	58	65	70
258	95.47	94.73	60	60	58	65	70
259	95.51	94.71	60	60	58	65	70
260	95.62	94.76	59	59	59	65	70
261	95.7	94.82	59	59	59	65	70
262	95.75	94.94	59	59	59	65	70
263	95.82	95.06	59	59	58	65	70
264	95.82	95.13	58	58	58	65	70
265	95.8	95.16	59	59	58	65	70
266	95.8	95.21	59	59	58	65	70
267	95.79	95.2	60	60	58	65	70
268	95.79	95.2	60	60	59	65	71
269	95.81	95.21	60	60	60	65	71
270	95.78	95.18	60	60	61	65	70
271	95.77	95.19	60	60	61	65	70
272	95.79	95.22	60	60	61	65	70
273	95.77	95.19	60	60	61	65	70
274	95.82	95.23	59	59	61	65	70
275	95.85	95.27	59	59	60	65	69
276	95.84	95.29	60	60	59	65	69
277	95.88	95.33	60	60	59	65	69
278	95.93	95.37	60	60	59	65	70
279	95.92	95.46	60	60	59	65	70
280	95.95	95.48	60	60	60	65	70
281	96	95.58	60	60	60	67	70
282	96.04	95.62	59	59	60	67	70
283	96.07	95.62	59	59	60	67	70
284	96.06	95.59	59	59	60	67	70
285	96.04	95.65	58	58	59	67	70
286	96	95.64	59	59	59	65	70
287	95.98	95.66	60	60	59	65	70
288	96.04	95.68	61	61	60	65	70
289	96.13	95.8	60	60	60	65	71
290	96.27	95.97	60	60	61	65	71
291	96.38	96.06	59	59	61	65	71
292	96.46	96.12	58	58	61	65	70
293	96.56	96.19	58	58	61	65	70
294	96.51	96.36	59	59	60	65	70
295	96.53	96.4	59	59	59	65	69
296	96.51	96.31	59	59	59	65	69
297	96.45	96.31	59	59	59	65	68
298	96.43	96.14	59	59	60	65	68
299	96.5	96.04	60	60	60	65	68
300	96.57	96.05	61	61	61	63	68
301	96.68	96.09	61	61	63	63	69
302	96.75	96.14	61	61	63	63	69
303	96.81	96.19	60	60	63	63	70
304	96.84	96.23	60	60	63	63	70
305	96.79	96.4	60	60	62	64	70
306	96.8	96.51	60	60	62	64	69
307	96.82	96.54	59	59	61	64	69
308	96.79	96.58	59	58	59	64	69
309	96.72	96.58	58	59	57	64	69
310	96.73	96.51	59	59	57	63	69
311	96.77	96.39	59	59	57	63	70
312	96.86	96.36	58	58	57	63	70
313	96.86	96.2	58	58	57	63	70
314	96.82	96.06	57	57	57	63	70
315	96.56	95.94	57	57	57	62	70
316	96.35	95.81	57	57	56	62	70
317	96.26	95.77	57	57	57	62	71
318	96.27	95.73	57	57	57	62	71
319	96.24	95.73	57	57	57	62	71
320	96.19	95.75	57	57	56	63	71
321	96.15	95.77	57	57	57	63	72
322	96.17	95.81	58	58	57	63	72
323	96.28	95.92	58	58	57	63	72
324	96.36	95.99	58	58	57	63	72
325	96.4	95.96	57	57	58	63	72
326	96.41	95.94	57	57	57	63	72
327	96.4	95.9	57	57	57	63	72
328	96.36	95.81	58	58	57	63	72
329	96.29	95.69	58	58	58	65	72
330	96.17	95.59	58	58	58	65	72
331	96.04	95.48	59	59	58	65	72
332	95.88	95.33	59	59	59	65	72
333	95.69	95.18	60	60	61	65	72
334	95.6	95.1	59	59	61	63	72
335	95.58	95.09	59	59	61	63	72
336	95.59	95.1	59	59	60	63	72
337	95.57	95.08	59	59	60	63	72
338	95.51	95.05	59	59	59	63	72
339	95.46	94.97	60	59	59	62	72
340	95.56	95.05	60	60	59	62	72
341	95.64	95.17	59	59	59	62	72
342	95.74	95.29	59	59	59	62	73
343	95.86	95.37	58	58	59	65	73
344	95.99	95.51	58	58	59	65	72
345	96.1	95.63	58	58	59	65	72
346	96.05	95.7	58	58	58	65	72
347	96.11	95.7	59	59	58	65	72
348	96.15	95.64	58	58	58	65	73
349	96.24	95.59	58	58	58	65	73
350	96.24	95.47	59	59	58	65	73
351	96.21	95.33	59	59	59	65	74
352	96.14	95.18	59	59	60	65	74
353	96.12	95.22	59	58	60	66	74
354	96.19	95.1	58	58	60	66	74
355	96.17	95	58	59	59	66	74
356	96.07	94.93	60	60	59	66	74
357	96	94.88	60	60	59	66	74
358	95.98	94.86	60	60	59	66	73
359	95.97	94.88	60	60	59	66	73
360	95.97	94.95	60	60	60	66	73
361	96.01	95.03	60	60	60	66	73
362	96.06	95.14	60	60	60	66	73
363	96.12	95.21	59	59	60	65	73
364	96.19	95.25	59	59	60	65	73
365	96.26	95.27	58	58	59	65	73
366	96.29	95.29	58	59	58	65	73
367	96.3	95.31	60	60	58	65	73
368	96.31	95.28	60	60	58	64	73
369	96.28	95.22	60	59	59	64	73
370	96.26	95.22	59	59	59	64	73
371	96.21	95.22	59	59	59	64	73
372	96.19	95.15	58	58	59	66	72
373	96.09	95.12	59	59	59	66	72
374	96.06	95.09	59	59	58	66	72
375	96.03	95.1	58	58	58	66	72
376	95.95	95.07	58	58	58	66	72
377	95.88	95	58	59	58	65	72
378	95.85	94.94	59	59	58	65	73
379	95.88	94.92	59	59	59	65	73
380	95.92	94.95	59	59	59	65	73
381	95.97	94.99	57	58	59	65	73
382	96.03	95.01	57	57	59	66	73
383	96.15	95.06	58	58	59	66	72
384	96.22	95.09	58	58	58	66	72
385	96.25	95.16	58	57	58	66	72
386	96.33	95.19	57	57	58	66	72
387	96.35	95.21	58	58	58	64	72
388	96.39	95.21	58	58	58	64	72
389	96.4	95.2	59	59	58	64	72
390	96.38	95.17	59	59	58	64	72
391	96.36	95.16	59	59	58	64	73
392	96.25	95.19	60	60	59	65	73
393	96.23	95.13	59	59	61	65	73
394	96.2	95.09	59	59	60	65	74
395	96.15	95.08	58	58	60	65	74
396	96.14	95.1	58	57	60	65	73
397	96.12	95.1	57	57	60	65	73
398	96.1	95.08	57	58	59	65	73
399	96.1	95.12	58	58	57	65	72
400	96.08	95.15	58	58	57	65	71
401	96.05	95.17	58	58	57	65	71
402	96.06	95.17	57	57	57	64	70
403	96.03	95.16	58	58	58	64	70
404	96	95.14	58	58	59	64	69
405	96.02	95.14	58	58	58	64	69
406	96	95.16	57	57	58	64	69
407	95.95	95.14	57	57	58	64	69
408	95.9	95.11	57	57	58	64	69
409	95.89	95.11	57	57	57	64	69
410	95.85	95.08	57	57	56	64	70
411	95.82	95.05	57	57	56	65	70
412	95.81	95.03	57	58	57	65	70
413	95.83	95.08	58	58	57	65	70
414	95.8	95.02	57	57	57	65	70
415	95.79	94.97	57	57	58	65	70
416	95.76	94.94	58	58	59	65	70
417	95.76	94.92	59	59	59	65	70
418	95.74	94.84	59	59	61	65	70
419	95.74	94.81	59	59	61	65	70
420	95.74	94.81	59	59	60	65	70
421	95.76	94.77	60	60	60	65	70
422	95.73	94.75	60	60	60	65	70
423	95.72	94.73	60	60	61	65	70
424	95.72	94.73	59	59	60	65	70
425	95.7	94.73	60	60	60	65	70
426	95.73	94.75	60	60	60	65	70
427	95.71	94.72	60	60	60	65	70
428	95.7	94.73	59	59	60	65	70
429	95.71	94.77	60	60	60	65	70
430	95.78	94.88	60	60	60	65	70
431	95.8	94.84	60	60	60	65	70
432	95.83	94.83	60	60	60	65	70
433	95.85	94.81	60	60	60	65	70
434	95.86	94.8	60	61	61	65	70
435	95.83	94.78	60	60	61	64	70
436	95.8	94.76	61	61	61	64	70
437	95.76	94.75	61	61	62	64	70
438	95.75	94.73	61	61	62	64	71
439	95.71	94.71	61	61	62	64	71
440	95.7	94.71	61	61	62	64	71
441	95.71	94.73	61	61	61	64	71
442	95.68	94.7	61	61	60	64	71
443	95.73	94.76	60	60	60	64	70
444	95.72	94.75	60	60	60	64	70
445	95.66	94.76	60	60	60	63	70
446	95.61	94.57	60	60	60	63	70
447	95.61	94.44	61	60	60	63	70
448	95.64	94.37	62	61	61	63	70
449	95.66	94.34	63	62	62	65	70
450	95.66	94.39	63	62	64	65	70
451	95.68	94.5	63	62	65	65	70
452	95.7	94.65	63	62	65	65	70
453	95.79	94.71	63	62	65	65	70
454	95.86	94.76	64	63	65	65	69
455	95.92	94.85	65	64	64	65	70
456	95.98	94.94	65	65	64	65	70
457	96.01	95.03	66	65	64	65	70
458	96.04	94.94	66	66	64	65	70
459	96	94.85	66	66	65	65	70
460	96.13	94.95	65	66	65	65	71
461	96.27	95.03	65	65	65	65	70
462	96.38	95.17	64	65	65	65	70
463	96.61	95.52	64	65	64	65	70
464	96.76	95.79	64	65	64	64	70
465	96.78	95.98	63	65	64	64	70
466	96.84	96.1	63	67	64	64	70
467	96.91	96.1	64	67	65	64	70
468	96.91	96.13	64	68	66	64	70
469	96.91	96.16	64	68	68	62	71
470	96.86	96.14	65	69	70	62	71
471	96.81	96.17	65	68	70	62	71
472	96.8	96.15	66	68	70	62	71
473	96.74	96.04	65	67	70	62	71
474	96.83	96.07	64	66	69	63	70
475	96.92	96.15	64	65	68	63	69
476	97.05	96.24	64	65	66	63	69
477	97	96.15	64	65	63	63	68
478	97.06	96.09	65	66	63	63	68
479	97.15	95.99	65	66	64	65	67
480	97.3	95.94	65	66	64	65	67
481	97.48	95.99	65	65	65	65	67
482	97.61	96.3	65	65	66	65	67
483	97.81	96.36	64	65	66	62	67
484	97.87	96.49	63	64	66	62	67
485	97.94	96.5	62	62	65	62	67
486	97.93	96.65	61	62	65	62	67
487	97.86	96.76	61	62	64	62	67
488	97.71	96.66	62	62	62	62	67
489	97.64	96.64	62	63	62	62	68
490	97.63	96.68	62	62	62	62	68
491	97.55	96.61	62	63	62	62	69
492	97.51	96.59	64	64	63	62	69
493	97.5	96.63	65	65	64	62	69
494	97.46	96.55	65	65	66	62	69
495	97.49	96.62	64	64	66	62	69
496	97.46	96.6	62	62	66	62	69
497	97.36	96.53	61	61	66	62	68
498	97.27	96.45	60	60	65	62	68
499	97.16	96.31	60	60	64	62	68
500	97.08	96.16	60	60	62	62	68
501	97.15	96.26	60	60	58	62	68
502	97.33	96.26	60	60	58	63	69
503	97.57	96.69	60	59	58	63	69
504	97.78	96.87	59	59	58	63	69
505	97.79	97.04	58	58	58	63	69
506	97.99	97.05	58	58	58	63	69
507	98.07	97.15	57	57	58	63	68
508	98.27	97.24	56	56	57	62	67
509	98.26	97.15	56	56	55	62	67
510	98.21	97.08	56	56	54	62	67
511	98.14	97	56	56	54	62	67
512	98.12	97.04	56	56	54	60	67
513	98.16	97.09	57	57	54	60	68
514	98.25	97.18	57	57	55	60	68
515	98.26	97.17	58	58	56	60	69
516	98.22	97.18	58	58	58	60	69
517	98.06	97.17	58	58	59	64	69
518	97.84	97.07	58	58	59	64	70
519	97.64	96.76	58	58	59	64	70
520	97.33	96.44	59	59	59	64	70
521	96.96	96.13	59	59	59	64	71
522	96.73	95.8	59	59	59	64	71
523	96.39	95.51	59	59	59	64	71
524	96	95.15	60	60	60	64	71
525	95.6	94.82	60	60	61	64	71
526	95.16	94.37	60	61	62	64	71
527	94.86	93.98	61	61	64	65	71
528	94.82	93.76	62	62	64	65	71
529	94.87	93.71	61	62	64	65	71
530	94.95	93.76	62	62	63	65	71
531	94.99	93.88	62	62	63	65	71
532	95.14	94.07	61	61	62	65	71
533	95.24	94.31	61	61	60	65	71
534	95.35	94.56	61	61	60	65	71
535	95.58	94.78	61	61	60	65	70
536	95.79	95.02	61	61	60	63	70
537	95.95	95.21	60	60	60	63	70
538	96.06	95.35	61	61	60	63	70
539	96.14	95.38	61	61	60	63	70
540	96.21	95.37	62	61	61	63	70
541	96.26	95.35	61	61	61	62	71
542	96.25	95.26	61	62	62	62	71
543	96.45	95.17	61	61	62	62	71
544	96.42	95.17	61	61	62	62	71
545	96.38	95.21	61	61	62	62	71
546	96.35	95.25	62	62	62	63	71
547	96.32	95.28	62	62	62	63	71
548	96.29	95.27	63	62	62	63	71
549	96.29	95.29	62	62	63	63	71
550	96.27	95.27	62	62	63	63	71
551	96.3	95.31	62	62	62	63	71
552	96.3	95.33	62	61	62	63	71
553	96.28	95.34	61	61	62	63	71
554	96.27	95.33	61	61	61	63	71
555	96.25	95.3	61	61	60	63	71
556	96.22	95.23	61	61	60	63	71
557	96.22	95.18	61	61	60	63	71
558	96.19	95.12	62	61	60	63	71
559	96.17	95.14	62	62	60	63	71
560	96.15	95.12	62	62	61	64	72
561	96.14	95.07	61	61	62	64	72
562	96.13	95.06	61	61	62	64	72
563	96.09	95.06	61	61	62	64	75
564	96.06	95.07	61	60	61	64	75
565	95.98	95.05	60	60	61	64	75
566	95.92	95.01	60	60	60	64	75
567	95.85	94.97	60	60	59	64	75
568	95.76	94.91	60	60	59	64	75
569	95.69	94.79	61	61	59	64	75
570	95.66	94.7	61	61	59	62	75
571	95.64	94.67	62	62	60	62	76
572	95.62	94.69	62	62	61	62	76
573	95.58	94.68	62	62	63	62	76
574	95.56	94.66	61	61	63	62	76
575	95.53	94.62	62	62	63	59	76
576	95.5	94.61	62	62	62	59	76
577	95.43	94.56	62	62	62	59	75
578	95.38	94.51	62	62	62	59	75
579	95.33	94.45	62	62	62	63	75
580	95.3	94.4	62	63	62	63	75
581	95.27	94.33	63	63	63	63	75
582	95.3	94.34	62	62	63	63	75
583	95.38	94.36	63	63	63	63	76
584	95.43	94.39	62	62	63	63	76
585	95.45	94.39	62	62	63	64	76
586	95.48	94.4	62	62	62	64	76
587	95.48	94.44	61	61	61	64	76
588	95.48	94.5	61	61	60	64	76
589	95.46	94.49	61	60	59	64	76
590	95.45	94.47	61	61	59	64	76
591	95.45	94.49	60	60	59	64	76
592	95.43	94.49	60	60	59	64	76
593	95.48	94.6	60	61	59	64	76
594	95.44	94.53	61	61	60	63	76
595	95.42	94.51	61	61	60	63	75
596	95.39	94.48	60	60	60	63	75
597	95.38	94.47	60	60	60	63	75
598	95.34	94.41	60	60	60	63	74
599	95.31	94.4	60	60	59	63	74
600	95.3	94.37	60	60	59	63	74
601	95.29	94.37	60	60	59	63	74
602	95.25	94.31	60	60	59	63	74
603	95.23	94.28	60	60	60	63	74
604	95.24	94.28	60	60	60	64	74
605	95.24	94.3	60	60	61	64	75
606	95.2	94.26	60	60	61	64	75
607	95.19	94.24	60	60	61	64	74
608	95.2	94.23	60	60	60	63	74
609	95.19	94.23	60	60	60	63	74
610	95.18	94.23	60	60	60	63	74
611	95.19	94.19	60	60	60	63	74
612	95.2	94.14	61	61	60	63	75
613	95.21	94.19	61	61	61	64	75
614	95.27	94.25	61	61	61	64	75
615	95.28	94.21	61	62	62	64	75
616	95.34	94.25	62	62	63	64	75
617	95.34	94.26	62	61	63	64	75
618	95.36	94.26	62	62	62	64	75
619	95.37	94.27	62	62	63	64	74
620	95.39	94.29	62	62	62	64	74
621	95.41	94.32	62	62	63	64	74
622	95.45	94.32	63	63	63	64	74
623	95.49	94.36	63	63	63	62	74
624	95.52	94.37	63	63	63	62	74
625	95.58	94.37	63	63	64	62	74
626	95.62	94.37	62	62	64	62	73
627	95.65	94.38	62	62	64	62	73
628	95.67	94.4	62	62	63	60	73
629	95.68	94.43	63	62	63	60	72
630	95.68	94.46	62	62	62	60	72
631	95.68	94.45	62	62	62	60	72
632	95.71	94.48	62	62	63	60	72
633	95.71	94.46	62	62	63	62	72
634	95.75	94.5	62	62	62	62	72
635	95.79	94.51	62	62	62	62	72
636	95.79	94.57	63	63	62	62	72
637	95.82	94.63	63	63	62	62	73
638	95.86	94.63	64	64	63	64	73
639	95.84	94.62	64	64	63	64	73
640	95.76	94.57	64	64	64	64	73
641	95.83	94.69	64	64	65	64	72
642	95.89	94.79	64	64	65	64	72
643	95.87	94.79	64	65	65	64	71
644	95.89	94.76	66	65	65	64	71
645	95.96	94.85	68	68	66	64	71
646	96.16	95.01	68	69	66	64	72
647	96.27	95.14	69	69	67	63	72
648	96.33	95.14	69	69	69	63	73
649	96.38	95.1	68	69	71	63	74
650	96.37	95.04	68	68	71	63	74
651	96.36	95.02	67	67	70	63	73
652	96.45	95.12	65	65	70	61	73
653	96.52	95.16	64	64	69	61	73
654	96.54	95.18	63	64	67	61	71
655	96.54	95.19	64	64	63	61	70
656	96.56	95.27	65	66	63	61	70
657	96.63	95.33	66	66	63	63	70
658	96.75	95.55	66	66	63	63	71
659	96.98	95.79	65	66	64	63	71
660	97.17	96.07	64	66	65	63	71
661	97.23	96.29	64	65	65	63	71
662	97.18	96.41	64	65	65	63	71
663	97.16	96.48	64	65	64	63	71
664	97.13	96.42	64	65	64	63	71
665	97.11	96.33	65	65	64	63	70
666	97.07	96.2	66	68	64	63	70
667	96.99	95.99	68	69	64	63	70
668	96.97	95.91	68	69	65	63	71
669	96.94	95.84	68	68	66	63	71
670	96.91	95.79	67	68	68	63	72
671	96.91	95.73	66	67	68	63	72
672	96.92	95.7	65	66	68	63	72
673	96.9	95.7	64	65	67	63	72
674	96.87	95.74	64	64	66	63	72
675	96.86	95.71	64	64	65	63	72
676	96.91	95.65	65	65	63	63	72
677	96.95	95.6	65	65	63	63	71
678	96.95	95.67	65	65	63	63	71
679	96.96	95.74	65	65	64	63	70
680	96.95	95.75	64	65	64	63	70
681	96.91	95.75	64	64	64	63	70
682	96.86	95.68	63	63	64	63	70
683	96.67	95.72	64	64	64	63	70
684	96.52	95.58	65	65	63	63	70
685	96.47	95.53	66	66	63	63	71
686	96.43	95.48	67	67	63	63	71
687	96.41	95.42	67	67	64	63	71
688	96.4	95.38	66	66	65	63	71
689	96.41	95.37	66	66	66	63	71
690	96.41	95.37	65	65	66	62	70
691	96.4	95.31	64	65	65	62	70
692	96.43	95.39	65	65	65	62	70
693	96.54	95.38	65	65	65	62	71
694	96.53	95.34	65	65	65	62	71
695	96.51	95.27	65	65	65	64	72
696	96.48	95.16	65	65	65	64	73
697	96.45	95.13	64	64	65	64	73
698	96.51	95.17	63	63	65	64	73
699	96.62	95.21	63	63	64	64	73
700	96.67	95.3	62	62	64	63	73
701	96.66	95.33	62	62	63	63	72
702	96.54	95.34	62	62	61	63	72
703	96.42	95.32	62	62	60	63	72
704	96.28	95.26	62	62	60	63	73
705	96.16	95.16	63	63	60	63	73
706	96.06	95.02	63	62	60	63	73
707	96.03	94.91	62	62	61	63	72
708	95.94	94.85	61	61	61	63	72
709	95.83	94.8	61	61	61	63	72
710	95.64	94.68	61	61	60	63	72
711	95.49	94.58	61	60	60	63	72
712	95.37	94.51	61	61	60	63	71
713	95.17	94.42	61	61	60	63	72
714	95	94.38	62	62	60	64	72
715	94.74	94.21	62	62	61	64	73
716	94.58	93.96	63	63	62	64	73
717	94.6	93.76	63	63	64	64	73
718	94.59	93.68	63	63	64	64	73
719	94.57	93.55	62	63	64	64	73
720	94.65	93.53	62	62	64	64	73
721	94.7	93.59	62	62	64	64	73
722	94.77	93.65	62	62	63	64	73
723	94.93	93.73	62	62	62	64	73
724	95.01	93.8	63	63	62	64	72
725	95.14	93.91	63	63	62	64	72
726	95.23	94.01	63	63	62	64	73
727	95.28	94.12	63	63	63	64	73
728	95.36	94.21	63	63	63	64	73
729	95.44	94.31	63	63	64	64	72
730	95.5	94.4	63	63	64	64	72
731	95.53	94.42	64	64	64	64	71
732	95.63	94.55	64	64	64	64	71
733	95.72	94.64	64	64	64	64	71
734	95.75	94.7	66	66	65	63	71
735	95.82	94.74	67	67	66	63	71
736	95.87	94.63	68	68	68	63	71
737	95.98	94.71	68	67	72	63	71
738	95.99	94.72	67	67	72	63	71
739	96.11	94.77	66	66	71	64	71
740	96.25	94.99	67	66	71	64	71
741	96.34	95.07	67	66	70	64	71
742	96.4	94.95	67	66	69	64	71
743	96.47	95.04	67	67	66	66	71
744	96.34	95.15	68	67	66	66	71
745	96.3	95.23	68	67	66	66	72
746	96.37	95.26	68	67	66	66	72
747	96.54	95.4	68	67	67	66	72
748	96.71	95.58	68	68	68	66	72
749	96.78	95.72	68	68	70	68	72
750	97.01	95.82	68	68	70	68	71
751	97.07	95.86	67	66	69	68	71
752	97.14	95.85	65	65	69	68	71
753	97.25	95.87	64	64	69	62	71
754	97.34	95.94	64	65	68	62	70
755	97.4	95.98	66	65	66	62	70
756	97.31	95.91	66	66	66	62	71
757	97.19	95.68	67	67	66	62	71
758	97.19	95.67	67	67	66	64	71
759	97.36	95.68	67	67	66	64	71
760	97.42	95.72	66	66	67	64	70
761	97.42	95.71	65	65	67	64	70
762	97.37	95.69	64	64	67	64	70
763	97.3	95.61	64	64	66	62	69
764	97.26	95.61	65	64	65	62	69
765	97.21	95.64	65	65	64	62	69
766	97.15	95.61	65	65	65	62	70
767	97.15	95.6	65	66	65	62	70
768	97.26	95.75	66	66	65	64	70
769	97.34	95.77	66	66	65	64	70
770	97.41	95.84	66	66	66	64	70
771	97.41	95.94	65	65	66	64	70
772	97.34	96.06	65	65	66	63	70
773	97.25	96.25	64	65	66	63	69
774	97.2	96.39	65	65	65	63	70
775	97.18	96.43	65	65	65	63	70
776	97.14	96.25	65	65	64	63	70
777	97.09	96.19	64	64	64	62	70
778	97.01	96.01	65	65	64	62	70
779	97.02	95.93	66	66	64	62	70
780	96.98	95.8	67	67	64	62	70
781	96.99	95.77	68	68	64	62	71
782	97.05	95.81	68	68	65	63	71
783	97.13	95.81	67	67	66	63	71
784	97.18	95.85	65	65	65	63	71
785	97.25	95.89	63	63	65	63	71
786	97.39	96.1	62	62	65	63	71
787	97.54	96.17	62	62	64	62	70
788	97.66	96.12	62	62	62	62	70
789	97.73	96.12	62	62	61	62	70
790	97.76	96.11	62	62	61	62	71
791	97.74	96.21	64	64	61	62	71
792	97.85	96.23	67	67	61	70	72
793	97.81	96.21	67	66	62	70	71
794	97.76	96.09	66	66	63	70	71
795	97.7	96.05	65	66	63	70	71
796	97.67	96	64	64	63	62	70
797	97.69	96	62	62	63	62	70
798	97.58	95.81	62	62	62	62	69
799	97.44	95.7	62	62	62	62	70
800	97.32	95.67	64	64	62	62	71
801	97.3	95.63	63	63	62	62	71
802	97.19	95.5	63	63	62	62	71
803	97.01	95.29	62	62	63	62	71
804	96.9	95.15	62	61	63	62	71
805	96.82	95.01	61	62	63	62	71
806	96.83	94.91	62	62	62	62	70
807	96.88	94.66	63	63	62	62	70
808	96.92	94.7	63	63	62	62	70
809	96.98	94.85	62	62	62	62	71
810	97.03	94.97	61	61	62	62	71
811	97.04	95.13	61	61	62	62	71
812	97.15	95.3	62	62	62	62	70
813	97.25	95.23	63	63	62	62	70
814	97.06	95.22	63	63	62	62	70
815	97.01	95.21	63	63	62	62	69
816	96.99	95.22	64	63	62	62	69
817	96.99	95.23	65	65	63	62	70
818	96.99	95.22	65	66	64	62	70
819	96.99	95.22	65	65	66	62	70
820	96.93	95.19	64	64	70	63	70
821	96.86	95.15	63	63	70	63	71
822	96.85	95.18	63	62	69	63	71
823	96.83	95.1	62	61	69	63	71
824	96.72	95.12	62	61	68	63	71
825	96.67	95.17	62	62	66	63	71
826	96.61	95.11	63	63	62	63	72
827	96.53	95.05	63	63	62	63	72
828	96.43	94.94	64	63	62	63	72
829	96.36	94.76	64	64	62	63	72
830	96.38	94.79	65	65	63	62	72
831	96.36	94.82	65	65	64	62	71
832	96.43	94.98	64	64	66	62	70
833	96.51	95.08	63	63	66	62	70
834	96.59	95.19	63	63	65	62	70
835	96.63	95.28	64	63	65	61	70
836	96.58	95.3	64	63	65	61	70
837	96.56	95.28	65	65	65	61	70
838	96.55	95.25	66	66	66	61	70
839	96.54	95.27	67	66	67	61	72
840	96.5	95.3	66	65	68	63	72
841	96.47	95.35	65	64	68	63	72
842	96.52	95.41	64	64	68	63	70
843	96.43	95.51	64	63	67	63	70
844	96.24	95.68	63	63	67	63	70
845	96.31	95.67	64	64	65	61	69
846	96.4	95.73	65	65	65	61	69
847	96.46	95.74	66	65	65	61	69
848	96.76	95.98	67	67	65	61	70
849	96.97	96.16	68	68	65	61	70
850	97.36	96.34	68	68	66	61	71
851	97.4	95.95	68	70	67	61	71
852	97.41	95.37	67	70	69	61	71
853	97.42	94.94	67	70	68	61	71
854	97.38	94.64	66	68	68	61	71
855	97.36	94.43	65	67	68	61	71
856	97.29	94.37	66	67	68	61	70
857	97.14	94.66	66	68	67	61	70
858	97.19	95.46	67	69	66	61	70
859	97.12	95.45	68	69	66	62	71
860	97.09	95.47	69	70	66	62	71
861	97.07	95.48	68	69	67	62	71
862	97.07	95.57	68	69	68	62	70
863	97.15	95.66	68	69	69	62	70
864	97.22	95.73	68	69	69	62	69
865	97.35	95.86	68	68	69	62	69
866	97.39	96.15	67	68	69	62	69
867	97.51	96.26	67	67	68	62	69
868	97.54	96.36	67	67	67	62	69
869	97.51	96.34	67	67	66	61	69
870	97.41	96.29	68	68	66	61	69
871	97.36	96.28	68	68	66	61	69
872	97.33	96.25	67	67	66	61	69
873	97.4	96.3	66	67	66	61	68
874	97.41	96.34	66	66	66	61	68
875	97.43	96.37	66	66	66	61	68
876	97.17	96.44	66	66	66	61	68
877	97.2	96.46	65	65	65	61	68
878	97.27	96.47	64	64	64	60	68
879	97.34	96.52	63	64	62	60	68
880	97.35	96.59	63	64	60	60	68
881	97.27	96.62	63	64	60	60	69
882	97.22	96.54	64	64	60	60	70
883	97.16	96.42	65	65	60	61	70
884	97.14	96.29	65	66	61	61	71
885	97.12	96.21	66	66	62	61	71
886	97.12	96.19	66	67	64	61	71
887	97.12	96.19	65	65	66	61	71
888	97.14	96.18	64	64	66	63	71
889	97.15	96.18	62	62	66	63	70
890	97.18	96.22	62	62	65	63	69
891	97.2	96.28	62	62	64	63	69
892	97.2	96.29	63	63	62	63	69
893	97.19	96.24	66	66	63	60	69
894	97.14	96.13	67	67	63	60	69
895	97.02	96.05	68	68	63	60	72
896	96.93	95.95	68	68	64	60	72
897	96.85	95.86	66	66	66	60	72
898	96.79	95.83	65	65	66	63	71
899	96.73	95.75	63	63	66	63	71
900	96.62	95.73	62	62	65	63	70
901	96.49	95.65	62	62	64	63	70
902	96.38	95.53	63	62	62	63	70
903	96.2	95.43	63	63	60	62	70
904	95.99	95.2	64	64	60	62	70
905	95.82	94.91	64	64	60	62	70
906	95.71	94.78	64	64	61	62	71
907	95.72	94.75	63	63	62	62	72
908	95.62	94.72	64	64	64	65	72
909	95.48	94.69	64	64	64	65	73
910	95.34	94.63	64	63	65	65	73
911	95.21	94.58	63	63	65	65	73
912	95.11	94.43	63	63	64	65	73
913	95	94.27	63	63	64	65	73
914	94.74	93.97	64	64	64	65	73
915	94.64	93.81	65	65	64	65	73
916	94.51	93.77	65	65	64	65	73
917	94.39	93.7	65	65	64	65	74
918	94.34	93.56	65	65	65	65	75
919	94.37	93.6	64	64	65	65	75
920	94.41	93.48	64	64	65	65	74
921	94.47	93.59	63	63	65	65	74
922	94.59	93.82	63	63	64	65	74
923	94.62	93.83	62	62	64	65	72
924	94.68	93.81	62	62	63	65	72
925	94.82	93.83	63	63	62	65	72
926	94.97	93.93	63	64	62	65	71
927	95.19	94.02	64	64	63	66	71
928	95.4	94.21	63	63	63	66	72
929	95.59	94.21	63	63	63	66	72
930	95.67	94.45	62	62	63	66	72
931	95.69	94.53	62	62	63	73	71
932	95.75	94.64	62	62	63	73	71
933	95.81	94.74	62	61	62	73	71
934	95.82	94.8	61	61	61	73	71
935	95.89	94.88	61	61	60	73	71
936	95.92	94.91	61	60	59	73	71
937	95.93	94.95	60	60	59	63	71
938	95.96	95.03	60	60	58	63	71
939	95.99	95.09	60	60	58	63	71
940	95.98	95.1	60	60	59	63	71
941	95.92	95.05	61	61	59	65	71
942	95.92	95.1	62	62	59	65	71
943	95.88	95.13	61	61	60	65	71
944	95.8	95.06	61	61	62	65	72
945	95.76	95.03	61	61	63	65	72
946	95.7	95.01	61	61	63	65	72
947	95.66	94.96	61	61	63	65	72
948	95.64	94.9	61	61	62	65	72
949	95.56	94.85	62	62	62	65	72
950	95.48	94.77	62	62	62	65	72
951	95.41	94.67	63	63	62	64	72
952	95.42	94.65	63	63	62	64	72
953	95.43	94.61	62	62	63	64	73
954	95.49	94.59	63	63	63	64	73
955	95.55	94.61	62	62	63	64	73
956	95.54	94.59	63	63	63	70	73
957	95.58	94.61	63	63	63	70	73
958	95.57	94.6	64	64	63	70	73
959	95.59	94.58	64	64	64	70	72
960	95.6	94.62	64	64	64	70	72
961	95.6	94.68	64	64	65	64	71
962	95.73	94.72	65	65	65	64	71
963	95.82	94.77	65	65	65	64	71
964	95.9	94.79	66	66	65	64	71
965	95.99	94.86	67	67	66	64	71
966	96.17	94.97	67	66	66	64	71
967	96.26	95.07	66	66	67	64	71
968	96.27	95.04	65	65	67	64	71
969	96.34	95.14	65	65	67	64	71
970	96.45	95.22	64	64	67	63	71
971	96.52	95.26	64	62	66	63	71
972	96.59	95.33	62	62	65	63	70
973	96.56	95.38	62	62	63	63	70
974	96.62	95.47	62	62	59	63	70
975	96.64	95.52	63	63	59	63	70
976	96.61	95.49	63	63	59	63	70
977	96.76	95.56	64	64	60	63	70
978	96.67	95.61	63	63	60	63	70
979	96.69	95.7	63	63	61	63	70
980	96.7	95.76	63	63	63	64	70
981	96.64	95.77	62	62	63	64	70
982	96.64	95.72	62	62	63	64	70
983	96.63	95.69	62	62	63	64	69
984	96.61	95.68	62	62	62	64	69
985	96.59	95.66	62	62	61	65	69
986	96.57	95.62	62	62	61	65	70
987	96.52	95.53	62	62	61	65	70
988	96.49	95.45	63	63	62	65	70
989	96.48	95.44	63	63	62	62	71
990	96.48	95.42	63	63	63	62	71
991	96.48	95.48	63	63	64	62	71
992	96.46	95.42	64	64	64	62	71
993	96.5	95.45	65	65	66	62	71
994	96.54	95.46	65	65	68	62	71
995	96.53	95.43	65	66	69	63	71
996	96.56	95.46	64	65	69	63	70
997	96.52	95.5	64	64	69	63	70
998	96.4	95.49	64	64	68	63	70
999	96.26	95.38	65	65	68	64	70
1000	96.05	95.2	65	66	67	64	70
1001	95.87	94.96	65	66	66	64	70
1002	95.69	94.72	66	66	66	64	70
1003	95.68	94.65	66	66	66	64	70
1004	95.64	94.58	67	67	66	63	71
1005	95.62	94.5	67	67	67	63	71
1006	95.59	94.37	68	68	68	63	71
1007	95.69	94.48	70	70	70	63	72
1008	95.89	94.7	69	69	74	63	73
1009	95.99	94.8	68	68	74	62	73
1010	96.06	94.88	68	68	74	62	72
1011	96.08	94.85	67	67	73	62	71
1012	96.15	94.91	66	66	73	62	71
1013	96.05	94.82	65	65	72	62	70
1014	96.32	94.83	64	65	70	62	70
1015	96.57	94.99	64	64	66	62	70
1016	96.57	95.16	64	65	63	62	69
1017	96.71	95.21	68	68	63	62	69
1018	96.7	95.21	68	68	63	60	70
1019	96.73	95.35	68	68	64	60	70
1020	96.85	95.45	67	67	65	60	70
1021	96.93	95.43	67	67	67	60	71
1022	97.16	95.75	67	67	67	60	70
1023	97.25	95.91	68	68	67	61	70
1024	97.3	96.09	69	69	67	61	70
1025	97.43	96.31	69	69	67	61	70
1026	97.47	96.46	69	69	67	61	70
1027	97.45	96.49	69	69	68	61	70
1028	97.45	96.46	68	68	69	58	70
1029	97.46	96.45	67	67	69	58	70
1030	97.51	96.43	66	66	69	58	70
1031	97.56	96.32	66	66	68	58	69
1032	97.6	96.34	66	66	68	58	69
1033	97.6	96.22	66	66	67	60	69
1034	97.53	96.14	66	66	65	60	69
1035	97.53	96.11	66	66	65	60	70
1036	97.55	96.15	66	67	65	60	70
1037	97.56	96.15	66	66	65	60	70
1038	97.45	95.88	66	66	66	63	71
1039	97.49	95.79	65	65	66	63	71
1040	97.52	95.75	66	65	66	63	71
1041	97.56	95.76	66	65	66	63	71
1042	97.55	95.81	66	66	65	62	71
1043	97.46	95.84	65	65	65	62	71
1044	97.39	95.79	66	65	65	62	70
1045	97.38	95.91	67	66	65	62	70
1046	97.34	95.92	68	67	66	62	70
1047	97.3	95.91	69	68	66	62	71
1048	97.18	95.91	69	68	67	66	71
1049	96.98	95.52	69	68	69	66	71
1050	96.89	95.5	67	67	69	66	71
1051	96.86	95.44	66	65	69	66	71
1052	96.84	95.46	64	64	69	64	69
1053	96.98	95.58	64	64	68	64	69
1054	97.12	95.61	64	64	66	64	68
1055	97.28	95.73	66	65	63	64	68
1056	97.28	95.66	67	66	63	64	68
1057	97.31	95.69	68	67	64	64	69
1058	97.43	95.87	68	68	64	64	69
1059	97.57	96.08	68	68	65	64	69
1060	97.78	96.18	67	67	67	64	69
1061	97.86	96.24	66	66	67	64	69
1062	97.88	96.37	65	65	67	59	69
1063	97.85	96.4	64	64	67	59	68
1064	97.75	96.31	64	64	66	59	68
1065	97.52	96.21	64	64	64	59	68
1066	97.37	96.13	64	64	62	59	68
1067	97.24	95.97	65	65	62	60	69
1068	97.28	96.02	66	66	63	60	69
1069	97.39	96.11	66	66	63	60	69
1070	97.47	96.16	66	66	63	60	69
1071	97.52	96.16	65	65	64	60	68
1072	97.5	96.15	64	64	66	60	67
1073	97.48	96.14	65	65	66	60	67
1074	97.49	96.17	65	66	66	60	67
1075	97.49	96.14	65	67	66	60	67
1076	97.47	96.11	67	68	66	60	67
1077	97.5	96.1	67	68	66	61	68
1078	97.51	96.1	72	68	67	61	68
1079	97.35	96.06	77	67	68	61	68
1080	97.3	96.21	77	69	68	61	68
1081	97.33	96.36	76	70	68	58	68
1082	97.16	96.43	76	70	68	58	68
1083	97.12	96.47	76	70	68	58	68
1084	97.21	96.44	76	70	68	58	68
1085	97.25	96.42	76	70	68	58	68
1086	97.28	96.38	75	70	69	57	68
1087	97.35	96.38	75	70	70	57	68
1088	97.31	96.24	75	71	72	57	68
1089	97.31	96.26	74	72	74	57	68
1090	97.35	96.22	73	72	74	57	68
1091	97.39	96.13	73	71	74	61	68
1092	97.41	96.1	72	71	73	61	68
1093	97.59	96.16	70	70	72	61	69
1094	97.83	96.15	71	70	70	61	69
1095	97.72	96.08	70	70	67	61	69
1096	97.75	96.12	70	70	67	60	69
1097	97.97	96.05	71	70	67	60	69
1098	97.94	96.05	73	70	67	60	69
1099	97.84	96.4	74	70	67	60	68
1100	97.77	97.02	73	71	68	60	68
1101	97.71	97.25	73	71	70	48	68
1102	97.72	97.23	72	70	72	48	68
1103	97.86	97.24	72	70	72	48	68
1104	97.9	97.43	73	69	72	48	68
1105	97.9	97.68	73	68	71	48	68
1106	98.64	97.81	71	68	71	61	68
1107	98.48	97.81	71	68	70	61	68
1108	97.94	97.57	71	68	68	61	68
1109	97.77	96.54	72	69	68	61	68
1110	97.67	96.02	71	70	68	60	69
1111	97.49	96	71	70	68	60	69
1112	97.37	95.92	70	69	69	60	69
1113	97.46	95.9	68	68	69	60	69
1114	97.52	95.9	68	68	69	60	69
1115	97.61	96.2	67	66	69	57	68
1116	97.62	96.41	67	66	68	57	68
1117	97.63	96.62	67	67	66	57	68
1118	97.67	96.61	67	67	66	57	68
1119	97.65	96.61	66	67	66	57	69
1120	97.6	96.53	66	66	66	62	69
1121	97.66	96.47	66	65	66	62	69
1122	97.72	96.46	65	65	66	62	69
1123	97.72	96.46	64	65	66	62	69
1124	97.63	96.49	63	63	65	62	70
1125	97.59	96.3	62	62	64	61	70
1126	97.46	96.26	63	63	62	61	70
1127	97.28	96.16	63	63	60	61	70
1128	97.07	96.16	63	63	60	61	70
1129	96.96	95.89	63	63	60	64	71
1130	96.9	95.81	62	62	60	64	71
1131	96.82	95.69	62	62	61	64	71
1132	96.73	95.69	62	62	61	64	72
1133	96.66	95.52	62	63	62	64	71
1134	96.59	95.4	63	63	62	64	71
1135	96.59	95.37	63	63	63	63	71
1136	96.54	95.37	63	63	63	63	71
1137	96.51	95.38	62	63	63	63	70
1138	96.47	95.37	62	62	63	63	70
1139	96.45	95.33	62	62	63	63	70
1140	96.46	95.33	61	62	62	63	70
1141	96.46	95.34	61	61	61	63	70
1142	96.43	95.38	61	61	60	63	70
1143	96.35	95.37	61	61	60	63	71
1144	96.29	95.35	61	61	60	62	71
1145	96.22	95.35	62	61	60	62	71
1146	96.13	95.12	62	62	61	62	71
1147	96.1	95.08	62	62	62	62	71
1148	96.12	95.02	62	62	62	62	71
1149	96.04	95.02	62	62	62	61	71
1150	95.94	95.04	62	62	62	61	71
1151	95.78	94.96	62	62	62	61	71
1152	95.55	94.82	62	62	62	61	71
1153	95.27	94.54	62	62	62	61	71
1154	94.99	94.54	61	62	62	62	71
1155	94.76	94.32	62	61	62	62	72
1156	94.66	93.88	63	63	62	62	72
1157	94.69	93.79	63	63	62	62	72
1158	94.76	93.87	62	62	62	64	72
1159	94.86	93.87	61	62	63	64	73
1160	94.91	94.03	60	61	63	64	73
1161	95	94.22	60	60	62	64	73
1162	95.12	94.22	60	60	62	64	73
1163	95.26	94.3	61	60	62	64	72
1164	95.26	94.55	61	61	61	63	72
1165	95.39	94.63	61	62	61	63	72
1166	95.58	94.63	62	62	61	63	72
1167	95.7	94.66	62	62	61	63	72
1168	95.77	94.71	62	62	62	63	72
1169	95.77	94.6	61	61	63	63	72
1170	95.69	94.6	61	61	63	63	72
1171	95.5	94.68	61	61	62	63	72
1172	95.19	94.52	61	61	62	63	72
1173	94.92	94.27	61	61	62	66	71
1174	94.74	94.19	62	62	62	66	72
1175	94.3	94.19	63	62	62	66	72
1176	93.95	94.05	64	63	62	66	72
1177	93.66	93.36	64	64	62	66	72
1178	93.66	92.92	64	64	63	64	72
1179	93.36	92.66	64	64	64	64	73
1180	93.27	92.66	64	64	65	64	73
1181	93.27	92.46	64	64	65	64	73
1182	93.24	92.4	64	64	65	64	72
1183	93.24	92.41	64	64	64	64	72
1184	93.41	92.41	64	64	64	64	72
1185	93.52	92.48	64	64	64	64	72
1186	93.7	92.69	64	64	64	64	72
1187	93.9	92.95	64	64	64	64	72
1188	94.06	93.04	64	64	64	64	72
1189	94.2	93.04	63	64	64	64	72
1190	94.33	93.08	63	64	64	64	72
1191	94.33	93.27	63	65	63	64	72
1192	94.78	93.49	63	65	62	65	72
1193	95.11	93.49	64	65	62	65	72
1194	95.11	94.01	64	65	62	65	72
1195	95.4	94.4	64	64	63	65	72
1196	95.62	94.52	63	64	63	65	72
1197	95.68	94.52	62	64	63	64	72
1198	95.8	94.69	62	63	63	64	71
1199	95.8	94.9	62	63	62	64	71
1200	95.9	94.96	63	64	62	64	71
1201	95.93	94.96	65	64	62	64	71
1202	95.99	94.97	66	65	62	64	72
1203	95.99	95.03	66	68	63	64	72
1204	96.1	95.1	68	68	64	64	72
1205	96.05	95.1	67	68	66	64	73
1206	96	95.06	66	67	70	64	73
1207	95.78	95	65	66	70	64	72
1208	95.78	94.24	65	66	69	64	72
1209	95.72	94.11	66	66	69	64	71
1210	95.78	94.11	66	66	68	64	71
1211	95.82	94.01	66	66	66	64	71
1212	95.91	94.01	67	66	66	64	69
1213	95.9	94.4	67	67	66	64	69
1214	95.78	94.4	67	67	66	64	69
1215	95.74	94.43	67	67	66	64	69
1216	95.74	94.4	67	67	66	64	69
1217	95.62	94.43	66	67	66	61	69
1218	95.73	94.43	65	67	66	61	70
1219	95.93	94.46	64	68	66	61	70
1220	95.93	94.54	64	67	66	61	70
1221	96.28	94.87	63	64	65	60	69
1222	96.43	94.87	61	64	63	60	69
1223	96.54	94.86	61	64	59	60	68
1224	96.54	94.83	61	64	56	60	68
1225	96.67	94.93	60	63	56	60	68
1226	97.06	95.2	62	64	56	68	68
1227	97.34	95.52	63	64	57	68	69
1228	97.42	95.98	63	64	57	68	69
1229	97.42	96.25	63	64	59	68	69
1230	97.45	96.56	62	63	62	68	69
1231	97.39	96.56	61	63	62	66	69
1232	97.31	96.53	60	62	62	66	69
1233	97.31	96.41	60	61	62	66	69
1234	97.31	96.4	60	60	62	66	70
1235	97.15	96.4	60	60	61	66	70
1236	97.03	96.22	61	61	60	64	70
1237	96.92	96.06	61	61	60	64	70
1238	96.91	95.86	62	61	60	64	71
1239	96.91	95.94	62	63	61	64	71
1240	96.78	95.94	63	63	61	64	71
1241	96.67	95.8	63	64	62	64	72
1242	96.53	95.62	61	63	64	64	72
1243	96.53	95.38	61	61	64	64	72
1244	96.46	94.84	61	60	64	64	71
1245	96.06	94.84	60	60	63	64	69
1246	95.85	94.61	60	60	63	64	69
1247	95.85	94.45	60	60	61	64	69
1248	95.66	94.2	61	62	61	64	69
1249	95.34	94.2	62	62	61	64	69
1250	95.2	94.07	62	62	61	63	69
1251	95.2	93.89	62	62	61	63	69
1252	95.11	93.65	62	62	62	63	69
1253	94.97	93.6	61	61	62	63	69
1254	94.97	93.69	61	61	62	63	69
1255	95.14	93.94	61	61	61	65	69
1256	95.18	94.13	61	61	61	65	69
1257	94.8	94.25	63	61	61	65	69
1258	94.8	94.33	64	61	61	65	69
1259	94.8	94.38	63	61	62	65	69
1260	94.8	94.41	63	62	62	63	69
1261	94.7	94.31	64	62	64	63	69
1262	94.81	94.18	64	63	65	63	69
1263	94.99	94.21	65	63	66	63	69
1264	94.99	94.46	65	64	67	63	69
1265	95.1	94.6	66	65	69	63	69
1266	95.28	94.66	67	67	70	63	69
1267	95.32	94.59	66	67	70	63	69
1268	95.5	94.55	65	66	70	63	68
1269	95.5	94.87	65	65	70	63	68
1270	95.61	95.07	64	64	70	63	68
1271	95.72	95.25	64	64	69	63	68
1272	95.72	95.4	65	64	67	63	68
1273	95.72	95.48	65	65	64	63	68
1274	95.78	95.69	65	66	64	63	68
1275	95.89	95.72	67	68	65	64	68
1276	95.92	95.52	66	67	65	64	69
1277	95.92	95.32	66	66	66	64	69
1278	95.99	95.27	66	65	66	64	69
1279	96.29	95.41	64	64	66	61	68
1280	96.44	95.53	63	63	65	61	68
1281	96.44	95.62	63	63	65	61	67
1282	96.41	95.41	63	63	63	61	66
1283	96.44	95.52	63	63	63	61	66
1284	96.46	95.6	64	63	63	61	67
1285	96.45	95.62	64	66	64	61	67
1286	96.49	95.69	65	67	64	61	67
1287	96.67	95.75	67	68	65	61	67
1288	96.78	95.86	68	68	67	61	67
1289	96.89	96.06	68	69	71	63	67
1290	96.89	96.26	68	69	72	63	67
1291	96.99	96.39	68	69	71	63	69
1292	97.08	96.26	67	69	71	63	70
1293	97.21	96.15	67	67	71	63	70
1294	97.21	96.39	67	68	71	59	70
1295	97.28	96.48	67	68	70	59	70
1296	97.2	96.33	67	68	68	59	70
1297	97.44	96.38	68	68	68	59	70
1298	97.47	96.47	68	68	68	58	70
1299	97.47	96.51	68	69	68	58	70
1300	97.45	96.53	70	70	68	58	69
1301	97.29	96.53	68	68	68	58	69
1302	97.22	96.6	68	69	69	58	69
1303	97.16	96.7	68	68	70	58	68
1304	97.16	96.78	68	67	72	60	68
1305	97.14	96.89	68	67	77	60	68
1306	97.08	96.8	68	66	76	60	68
1307	97.08	96.71	68	66	76	60	68
1308	97.07	96.59	68	66	74	61	68
1309	97.14	96.52	70	68	72	61	68
1310	97.32	96.51	72	70	73	61	68
1311	97.32	96.63	72	70	73	61	68
1312	97.43	96.85	70	69	73	61	68
1313	97.43	97.02	68	67	73	63	68
1314	97.13	96.85	64	65	72	63	68
1315	97.13	96.68	64	64	72	63	68
1316	97.15	96.75	64	64	70	63	67
1317	97.16	96.77	65	64	67	63	68
1318	97.69	96.95	66	65	65	64	68
1319	97.69	97.25	66	66	65	64	68
1320	98.11	97.56	67	66	65	64	68
1321	98.2	97.57	67	67	66	64	68
1322	98.27	97.28	67	66	67	64	68
1323	98.18	97.02	66	65	66	64	68
1324	98.15	96.83	66	64	66	64	68
1325	98.15	96.67	66	64	66	64	67
1326	98.09	96.68	66	63	66	64	67
1327	98.07	96.66	66	63	65	64	67
1328	97.95	96.6	65	63	63	63	67
1329	97.88	96.56	66	63	63	63	67
1330	97.88	96.56	66	64	63	63	68
1331	97.71	96.52	67	65	63	63	68
1332	97.55	96.54	67	66	65	64	68
1333	97.52	96.6	67	65	65	64	69
1334	97.52	96.71	67	64	65	64	69
1335	97.55	96.76	65	64	65	64	69
1336	97.56	96.8	64	63	65	64	69
1337	97.48	96.8	63	63	64	64	69
1338	97.48	96.75	63	62	61	64	69
1339	97.44	96.68	62	61	59	64	69
1340	97.35	96.52	61	61	58	64	69
1341	96.94	96.37	60	60	58	64	69
1342	96.94	96.21	60	60	58	64	69
1343	96.76	96.03	60	60	57	64	69
1344	96.69	96	59	59	57	64	68
1345	96.83	96.08	58	59	57	64	68
1346	96.83	96.13	58	58	56	64	68
1347	96.86	96.17	58	58	56	65	68
1348	96.8	96.08	58	58	57	65	68
1349	96.74	96.03	58	58	57	65	68
1350	96.42	95.9	61	59	57	65	68
1351	96.42	95.77	61	60	60	65	68
1352	96.26	95.72	62	62	64	65	68
1353	96.06	95.32	62	62	65	65	68
1354	95.63	94.99	62	62	65	65	68
1355	95.2	94.41	62	62	65	65	69
1356	94.8	93.98	63	63	65	65	69
1357	94.54	93.62	63	63	65	65	69
1358	94.35	93.07	63	63	65	65	69
1359	93.83	92.66	63	63	65	65	69
1360	93.83	92.11	63	63	64	65	69
1361	93.42	91.64	62	62	63	65	69
1362	92.98	91.08	62	62	63	65	69
1363	92.47	90.79	62	63	62	65	69
1364	92.18	90.73	63	63	62	65	70
1365	92.16	90.72	63	63	62	65	70
1366	92.32	90.91	63	63	62	65	70
1367	92.59	91.36	62	62	62	65	70
1368	92.99	91.9	63	63	62	65	70
1369	93.54	92.53	62	62	62	65	70
1370	94.1	93.14	61	61	62	65	70
1371	94.47	93.6	61	61	61	65	70
1372	94.83	94.06	60	60	58	65	69
1373	95.16	94.41	60	60	58	65	69
1374	95.43	94.68	60	60	58	65	69
1375	95.6	94.89	60	59	58	65	69
1376	95.72	95.05	59	59	58	65	69
1377	95.78	95.12	59	59	59	65	70
1378	95.77	95.14	59	60	59	65	70
1379	95.78	95.19	60	60	60	65	70
1380	95.78	95.21	59	59	60	65	70
1381	95.76	95.18	58	58	60	65	70
1382	95.73	95.11	58	58	59	65	70
1383	95.62	95.02	58	58	59	65	70
1384	95.59	94.97	57	58	59	65	69
1385	95.56	94.97	57	57	58	64	70
1386	95.41	94.97	57	57	56	64	70
1387	95.41	94.87	57	57	56	64	70
1388	95.33	94.77	57	57	56	64	70
1389	95.27	94.7	58	58	56	64	70
1390	95.26	94.7	59	59	56	66	70
1391	95.25	94.68	59	59	58	66	71
1392	95.2	94.65	58	59	59	66	71
1393	95.19	94.91	58	58	59	66	70
1394	95.14	94.89	58	58	59	66	70
1395	95.1	94.83	58	58	58	66	70
1396	95.1	94.79	58	58	58	66	70
1397	95.07	94.78	57	57	57	66	70
1398	95.05	94.74	57	57	56	66	70
1399	94.99	94.69	57	57	56	66	70
1400	94.97	94.64	58	58	57	66	70
1401	95.03	94.57	58	58	57	66	70
1402	95.1	94.63	58	58	57	66	70
1403	95.16	94.61	58	58	57	66	70
1404	95.18	94.63	57	57	57	66	70
1405	95.26	94.63	57	57	57	64	70
1406	95.24	94.67	57	57	57	64	70
1407	95.27	94.67	56	56	56	64	70
1408	95.31	94.67	55	55	53	64	70
1409	95.26	94.65	55	55	53	64	70
1410	95.21	94.59	55	55	53	65	70
1411	95.17	94.55	54	54	54	65	71
1412	95.12	94.54	54	54	53	65	71
1413	95.08	94.49	54	54	53	65	71
1414	95.01	94.41	54	54	53	65	71
1415	95.02	94.41	53	53	52	65	71
1416	94.93	94.36	53	53	52	65	71
1417	94.85	94.35	54	54	53	65	71
1418	94.79	94.3	54	54	53	65	71
1419	94.75	94.34	54	54	53	63	71
1420	94.69	94.35	55	55	53	63	70
1421	94.66	94.37	55	55	54	63	71
1422	94.63	94.38	55	55	56	63	71
1423	94.58	94.34	55	55	56	63	71
1424	94.54	94.32	56	56	56	65	70
1425	94.49	94.29	56	56	56	65	70
1426	94.47	94.25	56	56	56	65	70
1427	94.46	94.21	55	55	56	65	70
1428	94.45	94.21	55	55	55	65	70
1429	94.49	94.24	56	56	55	65	70
1430	94.53	94.26	56	56	53	65	70
1431	94.57	94.26	55	55	49	65	70
1432	94.63	94.31	56	56	50	65	70
1433	94.67	94.35	56	56	50	65	71
1434	94.71	94.39	56	56	51	67	71
1435	94.74	94.44	56	56	53	67	71
1436	94.78	94.5	57	57	57	67	71
1437	94.83	94.58	57	57	57	67	71
1438	94.85	94.58	56	56	57	67	71
1439	94.86	94.57	56	56	57	66	71
1440	94.86	94.58	56	56	57	66	71
1441	94.87	94.58	56	56	56	66	71
1442	94.83	94.59	55	55	55	66	71
1443	94.87	94.6	55	55	54	66	71
1444	94.86	94.62	55	55	54	65	89
1445	94.87	94.64	55	55	54	65	89
1446	94.89	94.66	56	56	54	65	89
1447	94.91	94.66	56	56	55	65	53
1448	94.95	94.7	56	56	56	66	53
1449	95.03	94.76	56	56	56	66	55
1450	95.13	94.85	55	55	56	66	59
1451	95.24	94.96	55	55	56	66	59
1452	95.35	95.09	55	55	56	66	62
1453	95.36	95.18	54	54	55	64	62
1454	95.45	95.17	54	54	54	64	66
1455	95.48	95.22	55	55	54	64	69
1456	95.47	95.25	55	55	54	64	69
1457	95.47	95.24	55	55	54	64	65
1458	95.44	95.2	55	55	54	64	71
1459	95.42	95.16	56	56	55	64	71
1460	95.38	95.1	56	56	56	64	73
1461	95.34	94.99	56	56	57	64	73
1462	95.27	94.9	56	56	57	64	73
1463	95.21	94.79	56	56	57	64	73
1464	95.16	94.74	56	56	57	64	74
1465	95.09	94.71	57	57	57	64	74
1466	95.04	94.67	57	57	57	64	74
1467	94.99	94.63	57	57	57	64	74
1468	94.96	94.63	58	58	58	64	74
1469	94.97	94.65	58	58	59	64	75
1470	95.01	94.71	58	58	59	64	74
1471	95.06	94.78	58	58	59	64	74
1472	95.1	94.87	57	57	59	64	74
1473	95.11	94.91	56	56	59	0	74
1474	95.19	94.95	56	56	58	0	78
1475	95.26	95.04	55	55	57	0	78
1476	95.35	95.23	55	55	54	0	78
1477	95.43	95.33	56	56	54	0	78
1478	95.51	95.39	56	56	54	0	78
1479	95.53	95.39	57	57	55	0	78
1480	95.55	95.39	58	58	55	0	86
1481	95.59	95.43	58	58	56	0	86
1482	95.59	95.41	58	58	58	68	86
1483	95.6	95.42	58	58	61	68	89
1484	95.6	95.41	59	59	61	68	89
1485	95.61	95.43	58	58	61	68	91
1486	95.64	95.47	58	58	61	68	88
1487	95.65	95.49	58	58	61	70	88
1488	95.67	95.51	58	58	61	70	84
1489	95.69	95.54	57	57	61	70	81
1490	95.7	95.53	58	58	60	70	81
1491	95.69	95.52	58	58	60	70	80
1492	95.69	95.5	58	58	59	70	80
1493	95.69	95.55	58	58	59	70	79
1494	95.66	95.51	59	59	59	70	80
1495	95.61	95.42	58	58	59	70	80
1496	95.56	95.35	58	58	59	73	83
1497	95.49	95.29	58	58	59	73	83
1498	95.41	95.2	58	58	58	73	83
1499	95.4	95.09	57	57	57	73	80
1500	95.33	94.97	57	57	57	73	80
1501	95.24	94.87	58	58	57	73	80
1502	95.24	94.85	58	58	57	74	80
1503	95.23	94.85	58	58	57	74	80
1504	95.22	94.84	59	59	58	74	79
1505	95.24	94.87	58	58	59	74	80
1506	95.33	94.91	58	58	59	74	80
1507	95.31	94.91	59	59	59	74	79
1508	95.32	94.92	59	59	59	74	80
1509	95.32	94.92	59	59	59	74	80
1510	95.32	94.93	59	59	59	74	81
1511	95.32	94.96	59	59	59	74	81
1512	95.4	95.02	59	58	59	74	81
1513	95.43	95.04	59	59	59	74	81
1514	95.47	95.11	59	59	59	74	81
1515	95.52	95.18	58	58	59	74	81
1516	95.59	95.41	59	58	59	74	80
1517	95.47	95.51	59	59	59	74	80
1518	95.51	95.56	59	58	59	74	79
1519	95.59	95.58	59	59	59	74	78
1520	95.65	95.6	59	59	59	74	78
1521	95.72	95.61	59	59	59	73	78
1522	95.78	95.6	59	58	59	73	79
1523	95.78	95.57	59	59	59	73	79
1524	95.82	95.53	59	59	59	73	77
1525	95.84	95.52	58	58	59	67	77
1526	95.87	95.53	59	59	59	67	77
1527	95.83	95.58	59	59	59	67	76
1528	95.87	95.59	58	58	59	67	75
1529	95.98	95.62	58	58	59	67	75
1530	96.01	95.69	58	58	58	71	75
1531	96.05	95.79	58	57	57	71	75
1532	96.1	95.85	57	58	57	71	74
1533	96.12	95.89	58	58	57	71	74
1534	96.14	95.9	58	58	57	71	74
1535	96.13	95.88	57	57	57	72	73
1536	96.19	95.87	57	57	57	72	73
1537	96.17	95.86	57	57	57	72	73
1538	96.18	95.85	57	57	57	72	73
1539	96.17	95.82	57	57	57	72	73
1540	96.14	95.79	57	57	57	72	73
1541	96.13	95.77	58	58	57	72	73
1542	96.13	95.75	57	57	57	72	73
1543	96.15	95.75	57	57	58	72	73
1544	96.17	95.84	58	58	58	72	73
1545	96.22	95.96	57	57	58	71	73
1546	96.27	96	57	57	58	71	72
1547	96.27	96.02	58	58	58	71	72
1548	96.3	96.06	58	58	58	71	72
1549	96.29	96.08	58	58	58	71	73
1550	96.26	96.08	59	59	59	72	73
1551	96.23	96.07	59	59	60	72	73
1552	96.25	96.07	59	59	60	72	74
1553	96.21	96.07	59	59	60	72	74
1554	96.19	96.06	59	59	60	73	74
1555	96.19	96.06	58	58	60	73	75
1556	96.29	96.06	58	58	59	73	75
1557	96.29	96.05	58	58	58	73	75
1558	96.2	96.09	58	58	56	73	75
1559	96.21	96.07	58	57	56	73	75
1560	96.23	96.07	57	58	56	73	74
1561	96.28	96.1	58	58	57	73	74
1562	96.33	96.11	58	58	57	73	74
1563	96.32	96.15	58	58	58	73	74
1564	96.37	96.13	58	58	59	73	74
1565	96.38	96.21	58	58	59	73	74
1566	96.38	96.19	58	58	59	73	74
1567	96.37	96.2	59	59	59	73	74
1568	96.38	96.19	59	59	59	73	74
1569	96.37	96.18	59	59	59	73	74
1570	96.34	96.2	59	59	60	73	74
1571	96.3	96.19	59	59	59	73	74
1572	96.31	96.23	58	58	59	73	74
1573	96.27	96.24	58	58	59	73	74
1574	96.3	96.25	58	58	59	73	74
1575	96.4	96.29	58	58	58	73	74
1576	96.47	96.29	58	58	58	73	74
1577	96.51	96.28	58	58	58	73	74
1578	96.56	96.27	58	58	58	73	74
1579	96.59	96.23	58	58	59	72	73
1580	96.58	96.23	58	58	59	72	73
1581	96.57	96.22	58	58	59	72	73
1582	96.58	96.22	58	58	59	72	72
1583	96.58	96.27	58	58	59	72	72
1584	96.59	96.29	59	59	59	71	72
1585	96.57	96.27	59	59	59	71	72
1586	96.54	96.23	59	59	60	71	72
1587	96.49	96.18	60	60	61	71	72
1588	96.46	96.11	59	59	60	72	73
1589	96.43	96.06	59	59	60	72	73
1590	96.42	96.06	59	59	60	72	73
1591	96.53	96.17	58	58	60	72	72
1592	96.5	96.08	58	58	59	72	72
1593	96.45	95.99	58	58	57	72	72
1594	96.42	95.96	58	58	57	72	71
1595	96.37	95.91	58	58	57	72	71
1596	96.33	95.85	58	58	57	72	71
1597	96.34	95.83	59	59	58	72	71
1598	96.51	95.93	59	59	59	71	71
1599	96.77	96.22	59	59	60	71	71
1600	96.83	96.26	59	59	60	71	72
1601	96.82	96.22	58	58	60	71	72
1602	96.79	96.18	58	58	60	71	72
1603	96.82	96.08	57	57	59	71	72
1604	96.77	96.01	58	58	58	71	72
1605	96.77	95.92	58	61	58	71	73
1606	96.77	95.88	61	61	59	71	73
1607	96.72	95.85	61	61	59	71	74
1608	96.74	95.85	62	61	60	71	74
1609	96.78	95.9	61	61	61	71	74
1610	96.85	95.92	61	59	61	71	74
1611	96.9	95.96	59	59	61	71	74
1612	96.89	95.98	59	59	60	71	74
1613	96.92	95.98	59	59	59	71	74
1614	96.88	95.95	58	59	57	71	73
1615	96.85	95.95	58	58	57	71	73
1616	96.72	95.81	58	58	57	71	73
1617	96.64	95.67	59	59	57	71	73
1618	96.63	95.65	59	59	57	71	73
1619	96.58	95.61	58	58	58	71	73
1620	96.55	95.58	58	58	58	71	73
1621	96.48	95.53	58	58	57	71	72
1622	96.42	95.57	58	58	57	71	72
1623	96.43	95.54	58	58	57	71	72
1624	96.4	95.51	57	58	57	71	72
1625	96.36	95.48	58	58	57	71	72
1626	96.33	95.45	57	57	57	71	72
1627	96.31	95.42	57	57	57	73	73
1628	96.29	95.38	58	58	57	73	73
1629	96.28	95.38	58	58	57	73	73
1630	96.26	95.39	57	57	57	73	74
1631	96.24	95.36	57	57	57	73	74
1632	96.22	95.32	58	57	57	73	74
1633	96.2	95.31	58	58	57	73	74
1634	96.19	95.3	58	58	58	73	74
1635	96.18	95.3	58	58	58	73	73
1636	96.16	95.24	57	57	58	74	73
1637	96.15	95.26	58	58	58	74	73
1638	96.16	95.27	58	58	58	74	73
1639	96.19	95.27	57	57	58	74	73
1640	96.24	95.33	57	57	58	74	73
1641	96.26	95.37	57	57	58	73	73
1642	96.29	95.44	56	56	57	73	73
1643	96.37	95.52	56	56	56	73	72
1644	96.4	95.55	56	56	55	73	72
1645	96.37	95.53	57	57	55	73	72
1646	96.39	95.51	57	57	55	72	72
1647	96.4	95.49	58	58	55	72	73
1648	96.39	95.49	58	58	56	72	73
1649	96.38	95.43	58	58	57	72	73
1650	96.37	95.42	58	58	59	72	74
1651	96.35	95.4	58	58	59	74	74
1652	96.35	95.39	57	58	58	74	74
1653	96.31	95.39	58	58	58	74	74
1654	96.27	95.32	59	59	58	74	74
1655	96.23	95.3	59	59	59	74	74
1656	96.2	95.25	59	59	59	74	74
1657	96.15	95.2	60	60	59	74	74
1658	96.13	95.2	60	60	60	74	74
1659	96.11	95.2	60	60	62	74	74
1660	96.14	95.22	60	60	62	74	74
1661	96.15	95.23	60	60	62	74	74
1662	96.17	95.24	59	59	61	74	74
1663	96.22	95.29	58	58	61	74	73
1664	96.27	95.26	58	58	60	74	73
1665	96.34	95.33	58	58	58	73	73
1666	96.38	95.38	58	58	56	73	73
1667	96.41	95.43	58	58	56	73	73
1668	96.39	95.42	58	58	56	73	73
1669	96.42	95.43	58	58	57	73	73
1670	96.44	95.46	59	59	57	73	73
1671	96.45	95.46	59	59	58	73	74
1672	96.45	95.47	59	59	60	73	74
1673	96.42	95.46	59	59	61	73	74
1674	96.41	95.45	59	59	61	73	74
1675	96.41	95.45	59	59	61	73	74
1676	96.4	95.45	58	58	60	73	73
1677	96.36	95.42	58	58	60	73	73
1678	96.39	95.43	59	61	59	73	73
1679	96.34	95.43	61	61	59	73	72
1680	96.31	95.42	62	62	59	72	72
1681	96.27	95.39	62	62	60	72	72
1682	96.24	95.37	63	63	61	72	72
1683	96.21	95.35	62	62	63	72	72
1684	96.21	95.37	61	61	63	72	72
1685	96.27	95.43	61	61	63	72	72
1686	96.32	95.45	61	61	62	72	72
1687	96.4	95.5	61	61	62	72	72
1688	96.43	95.51	61	61	61	72	73
1689	96.45	95.53	60	60	60	73	73
1690	96.44	95.52	60	60	59	73	74
1691	96.44	95.53	60	60	59	73	74
1692	96.45	95.55	60	60	59	73	74
1693	96.46	95.53	59	59	59	73	74
1694	96.46	95.52	59	59	58	73	74
1695	96.45	95.51	60	59	57	73	74
1696	96.42	95.51	60	60	57	73	74
1697	96.41	95.5	60	59	57	73	74
1698	96.42	95.5	59	59	58	73	74
1699	96.38	95.49	59	59	58	73	74
1700	96.36	95.45	59	59	58	73	74
1701	96.29	95.39	59	59	58	73	73
1702	96.29	95.35	58	58	58	73	73
1703	96.25	95.36	58	58	58	73	73
1704	96.23	95.33	58	58	58	72	73
1705	96.22	95.38	59	59	58	72	73
1706	96.26	95.39	59	59	58	72	73
1707	96.29	95.41	59	59	59	72	73
1708	96.27	95.43	59	58	59	72	73
1709	96.29	95.44	59	59	59	72	72
1710	96.35	95.49	58	58	59	72	72
1711	96.4	95.54	58	58	58	72	72
1712	96.51	95.59	58	58	58	72	72
1713	96.51	95.62	58	58	57	72	72
1714	96.52	95.58	58	58	57	71	72
1715	96.52	95.56	58	58	57	71	72
1716	96.5	95.53	58	57	57	71	72
1717	96.47	95.5	57	57	57	71	72
1718	96.42	95.46	58	58	57	72	72
1719	96.39	95.43	58	58	57	72	72
1720	96.37	95.39	57	57	58	72	72
1721	96.37	95.36	57	57	58	72	72
1722	96.33	95.35	58	58	58	72	72
1723	96.29	95.34	58	58	58	73	73
1724	96.26	95.3	58	58	58	73	73
1725	96.21	95.26	58	58	58	73	73
1726	96.17	95.24	59	59	59	73	73
1727	96.16	95.26	59	59	60	73	73
1728	96.13	95.25	59	59	60	73	73
1729	96.13	95.25	59	59	60	73	73
1730	96.12	95.24	59	59	60	73	73
1731	96.13	95.28	60	59	60	73	73
1732	96.16	95.31	59	59	60	73	73
1733	96.17	95.32	59	59	60	73	73
1734	96.19	95.32	59	59	60	73	73
1735	96.28	95.41	59	59	59	73	72
1736	96.28	95.36	59	59	59	73	72
1737	96.26	95.33	60	60	59	73	73
1738	96.24	95.31	61	61	59	72	73
1739	96.22	95.17	61	61	59	72	73
1740	96.23	95.18	61	61	60	72	73
1741	96.28	95.19	61	61	61	72	73
1742	96.26	95.17	62	62	63	72	73
1743	96.26	95.15	61	61	63	73	73
1744	96.26	95.14	60	60	63	73	73
1745	96.35	95.29	60	60	62	73	72
1746	96.4	95.38	61	61	62	73	72
1747	96.42	95.41	61	61	61	71	72
1748	96.41	95.41	61	61	61	71	72
1749	96.41	95.42	62	62	61	71	72
1750	96.41	95.39	62	62	61	71	72
1751	96.43	95.41	62	62	62	71	73
1752	96.46	95.47	61	61	62	72	73
1753	96.44	95.48	62	62	62	72	73
1754	96.43	95.47	61	61	62	72	73
1755	96.41	95.44	61	61	62	72	74
1756	96.41	95.44	62	62	62	72	74
1757	96.4	95.41	62	62	62	72	74
1758	96.39	95.38	62	62	62	72	74
1759	96.4	95.4	62	62	63	72	74
1760	96.38	95.39	62	62	63	72	73
1761	96.38	95.38	62	62	62	72	73
1762	96.39	95.41	61	61	62	73	73
1763	96.38	95.43	60	60	62	73	73
1764	96.37	95.4	60	60	61	73	73
1765	96.36	95.38	60	60	59	73	73
1766	96.37	95.36	60	60	59	73	73
1767	96.36	95.34	60	60	59	72	73
1768	96.33	95.35	61	60	59	72	74
1769	96.27	95.3	61	61	60	72	74
1770	96.18	95.28	62	61	61	72	74
1771	96.09	95.18	61	61	63	72	74
1772	95.98	95.08	61	61	63	73	74
1773	95.91	94.97	61	61	62	73	74
1774	95.85	94.97	60	60	62	73	74
1775	95.75	94.83	59	59	62	73	74
1776	95.62	94.66	59	59	61	71	73
1777	95.55	94.47	59	59	59	71	72
1778	95.5	94.42	59	59	58	71	72
1779	95.44	94.35	60	60	58	71	71
1780	95.31	94.26	60	60	59	71	71
1781	95.2	94.2	60	60	59	71	71
1782	95.15	94.08	60	60	59	71	71
1783	95.02	93.97	60	60	60	71	71
1784	94.91	93.82	60	60	60	71	72
1785	94.67	93.57	59	59	60	71	72
1786	94.57	93.44	59	59	60	71	72
1787	94.38	93.27	59	59	59	71	72
1788	94.19	93.08	60	60	59	71	71
1789	94.04	92.94	59	59	59	71	71
1790	93.89	92.82	59	59	59	71	71
1791	93.72	92.64	60	60	60	71	71
1792	93.62	92.54	60	60	60	71	71
1793	93.51	92.45	59	59	60	71	70
1794	93.43	92.38	60	60	60	71	70
1795	93.36	92.31	61	61	61	71	70
1796	93.36	92.26	61	61	62	70	70
1797	93.32	92.29	61	61	63	70	70
1798	93.28	92.25	61	61	63	70	71
1799	93.19	92.24	62	62	63	70	71
1800	93.17	92.26	62	62	63	70	71
1801	93.13	92.16	62	62	63	71	70
1802	93.09	92.07	63	63	63	71	70
1803	93.05	92	63	63	63	71	70
1804	92.97	91.92	63	63	63	71	70
1805	92.89	91.82	63	63	64	71	70
1806	92.79	91.72	64	64	64	70	69
1807	92.7	91.66	64	63	64	70	69
1808	92.62	91.56	63	63	64	70	69
1809	92.55	91.49	63	63	64	70	69
1810	92.47	91.42	63	63	63	69	69
1811	92.42	91.32	62	63	63	69	69
1812	92.35	91.25	62	62	62	69	69
1813	92.23	91.18	62	62	62	69	69
1814	92.08	91.09	63	63	62	69	69
1815	92.08	91.07	62	62	62	69	70
1816	91.93	91.02	62	62	62	69	70
1817	91.73	91.04	62	63	62	69	71
1818	91.7	90.95	63	63	63	69	71
1819	91.76	90.89	63	64	65	69	71
1820	91.62	90.93	63	63	65	69	70
1821	91.51	90.86	63	63	65	69	70
1822	91.42	90.77	63	63	64	69	70
1823	91.38	90.71	63	63	64	69	70
1824	91.26	90.59	63	63	64	69	70
1825	91.11	90.55	64	64	64	68	70
1826	91.03	90.43	64	64	64	68	70
1827	90.9	90.28	64	64	64	68	69
1828	90.84	90.17	64	64	65	68	69
1829	90.8	90.09	64	64	65	68	69
1830	90.77	90.02	64	64	65	68	69
1831	90.81	89.97	64	64	64	68	69
1832	90.78	89.93	63	63	64	68	69
1833	90.78	89.92	63	63	64	68	69
1834	90.78	89.91	64	64	64	69	69
1835	90.76	89.93	63	63	63	69	69
1836	90.75	89.91	63	63	63	69	69
1837	90.73	89.88	64	64	63	69	69
1838	90.69	89.84	64	64	63	69	69
1839	90.64	89.76	63	63	63	69	69
1840	90.56	89.72	63	63	63	69	68
1841	90.49	89.7	64	64	64	69	68
1842	90.43	89.68	64	64	64	69	68
1843	90.39	89.7	64	64	64	69	68
1844	90.33	89.64	64	64	64	69	68
1845	90.27	89.63	64	64	65	68	67
1846	90.24	89.59	65	65	66	68	68
1847	90.21	89.49	66	65	67	68	68
1848	90.11	89.47	65	65	68	68	68
1849	90.04	89.44	65	65	68	67	69
1850	90.01	89.39	65	65	68	67	69
1851	90	89.4	65	65	67	67	69
1852	90.02	89.46	65	65	67	67	69
1853	90.02	89.42	65	65	66	67	69
1854	89.96	89.4	66	66	66	67	69
1855	90	89.36	66	66	66	67	69
1856	89.91	89.26	66	66	66	67	69
1857	89.92	89.22	66	67	67	67	69
1858	89.77	89.19	67	67	68	67	69
1859	89.71	89.2	67	67	69	68	69
1860	89.7	89.17	68	68	70	68	69
1861	89.4	89.15	69	69	71	68	69
1862	89.4	89.06	69	69	71	68	69
1863	89.39	88.91	69	69	71	68	69
1864	89.43	88.89	69	69	71	67	69
1865	89.58	88.86	69	69	71	67	68
1866	89.67	88.87	69	69	70	67	68
1867	89.63	88.87	69	69	69	67	67
1868	89.64	88.84	69	69	69	67	67
1869	89.66	88.89	69	69	69	66	67
1870	89.69	88.88	68	68	69	66	67
1871	89.68	88.94	68	68	69	66	67
1872	89.77	88.96	67	67	68	66	67
1873	89.73	88.96	66	67	67	66	67
1874	89.62	88.87	67	67	65	69	67
1875	89.69	88.87	67	66	64	69	67
1876	89.73	88.87	66	65	63	69	66
1877	89.71	88.83	66	65	63	69	66
1878	89.66	88.82	66	65	63	66	66
1879	89.63	88.74	66	65	63	66	66
1880	89.6	88.72	65	65	64	66	66
1881	89.49	88.61	65	65	65	66	67
1882	89.43	88.5	65	65	65	66	66
1883	89.3	88.37	64	64	65	68	66
1884	89.16	88.3	64	64	64	68	66
1885	89.06	88.19	64	64	64	68	66
1886	88.92	88.14	64	64	63	68	66
1887	88.59	88.04	65	65	63	68	66
1888	88.56	88	65	65	63	65	65
1889	88.52	87.99	65	65	63	65	65
1890	88.47	87.98	65	65	64	65	65
1891	88.41	87.95	65	65	65	65	65
1892	88.38	87.92	65	65	66	65	66
1893	88.33	87.84	65	65	66	65	66
1894	88.31	87.85	66	66	66	65	66
1895	88.28	87.84	66	66	66	65	66
1896	88.27	87.9	66	66	66	65	67
1897	88.27	87.82	66	66	66	65	67
1898	88.24	87.77	66	66	66	66	67
1899	88.24	87.78	65	65	66	66	67
1900	88.24	87.77	65	65	66	66	67
1901	88.18	87.72	66	66	66	66	66
1902	88.19	87.69	66	66	66	65	66
1903	87.94	87.76	66	66	66	65	66
1904	87.92	87.66	67	67	67	65	66
1905	87.9	87.53	67	67	68	65	66
1906	87.89	87.51	67	67	68	65	66
1907	87.81	87.42	67	67	68	65	66
1908	87.75	87.35	67	66	68	65	66
1909	87.68	87.25	66	66	68	65	65
1910	87.58	87.26	66	66	67	65	65
1911	87.45	87.21	67	66	66	65	65
1912	87.29	87.17	67	67	67	65	65
1913	87.28	86.99	67	67	67	65	65
1914	87.23	86.94	67	67	67	65	65
1915	87.22	86.89	67	67	67	65	65
1916	87.26	86.9	67	68	68	65	65
1917	87.22	86.87	68	68	69	64	65
1918	87.21	86.81	69	69	70	64	65
1919	87.22	86.7	66	69	70	64	65
1920	87.34	86.62	66	69	70	64	65
1921	87.36	86.59	66	69	70	64	65
1922	87.36	86.63	67	70	70	64	65
1923	87.36	86.59	67	69	70	64	65
1924	87.36	86.58	67	70	70	64	65
1925	87.32	86.52	68	70	70	64	65
1926	87.28	86.52	68	69	70	64	65
1927	87.19	86.39	68	69	70	64	65
1928	87.13	86.24	68	69	70	64	63
1929	87.06	86.12	68	68	69	64	63
1930	86.99	86.13	67	68	68	64	63
1931	86.87	86.11	68	68	68	63	63
1932	86.74	86.05	68	69	68	63	63
1933	86.57	85.91	68	69	68	63	63
1934	86.41	85.83	69	69	68	63	64
1935	86.34	85.74	69	69	69	63	64
1936	86.22	85.63	68	68	69	63	64
1937	86.07	85.52	68	68	69	63	64
1938	85.96	85.35	68	68	68	63	64
1939	85.88	85.27	68	68	68	63	64
1940	85.82	85.27	67	68	67	63	63
1941	85.74	85.22	68	68	67	62	63
1942	85.66	85.2	68	68	67	62	63
1943	85.65	85.23	68	68	67	62	63
1944	85.65	85.2	68	68	67	62	63
1945	85.65	85.14	68	68	68	62	63
1946	85.65	85.17	68	68	69	62	63
1947	85.58	85.15	67	68	69	62	63
1948	85.55	85.04	67	68	68	62	63
1949	85.57	84.97	68	69	68	62	63
1950	85.57	84.86	69	70	68	62	63
1951	85.58	84.83	70	70	68	61	63
1952	85.54	84.83	70	71	69	61	63
1953	85.37	84.71	71	71	69	61	63
1954	85.21	84.67	71	71	70	61	63
1955	85.11	84.64	71	71	72	61	63
1956	85.01	84.62	71	71	73	61	62
1957	84.98	84.51	72	72	73	61	62
1958	85.08	84.5	72	72	73	61	62
1959	85.13	84.49	71	71	73	61	62
1960	85.14	84.47	70	71	73	61	63
1961	85.12	84.39	71	71	72	61	63
1962	85.1	84.31	70	70	72	61	63
1963	85.12	84.3	70	70	72	61	63
1964	85.14	84.27	69	69	71	61	63
1965	85.08	84.16	69	69	69	61	63
1966	85.05	84.1	69	69	67	61	63
1967	84.97	84.08	68	68	67	61	62
1968	84.86	83.98	68	68	67	61	62
1969	84.73	83.88	68	68	67	61	62
1970	84.65	83.9	68	68	67	60	62
1971	84.55	83.77	68	68	67	60	62
1972	84.44	83.66	67	68	67	60	62
1973	84.34	83.6	68	68	67	60	62
1974	84.3	83.55	68	68	68	60	62
1975	84.22	83.53	67	67	68	61	62
1976	84.1	83.48	67	67	68	61	62
1977	83.99	83.41	68	68	68	61	62
1978	83.97	83.4	68	68	68	61	62
1979	83.99	83.43	67	68	68	60	62
1980	83.98	83.51	67	67	68	60	62
1981	83.92	83.53	69	69	68	60	62
1982	83.92	83.49	69	69	68	60	62
1983	83.92	83.53	70	70	68	60	62
1984	83.89	83.43	70	70	69	60	62
1985	83.81	83.32	71	71	70	59	62
1986	83.77	83.34	71	71	72	59	62
1987	83.78	83.39	70	70	73	59	61
1988	83.78	83.41	70	70	73	59	61
1989	83.86	83.52	71	71	72	59	61
1990	83.91	83.59	71	71	72	59	61
1991	83.79	83.52	71	71	72	59	61
1992	83.77	83.44	71	71	71	59	61
1993	83.79	83.44	72	72	71	59	61
1994	83.72	83.34	72	72	71	59	61
1995	83.67	83.25	72	72	72	59	61
1996	83.58	83.11	72	72	72	59	61
1997	83.44	83.05	73	73	73	59	61
1998	83.31	82.91	72	72	73	59	61
1999	83.18	82.82	71	72	73	59	61
[truncated: 2,125 more rows]
