# Supplementary material for: Detection of critical cerebral desaturation thresholds by three regional oximeters during hypoxia: a pilot study in healthy volunteers
Source: BMC Anesthesiol. 2017 Jan 13;17:6. doi: 10.1186/s12871-016-0298-7 (PMC5234256; doi:10.1186/s12871-016-0298-7)
Supplement: Additional file 10: — Raw data subject #2174. (XLSX 112 kb) [file 12871_2016_298_MOESM10_ESM.xlsx]

## Sheet: Sheet1
Time in sec	Ch1 SpO2	Ch2 SpO2	Ch1 PR	Ch2 PR	ECG HR	Invos_rSO2	equanox_rSO2	foresight_rSO2
1	96.01	95.43	61	61	61
2	96.02	95.46	62	62	61
3	96.03	95.48	62	62	62
4	96.02	95.48	61	61	62
5	95.98	95.49	61	61	61
6	95.97	95.52	61	61	61
7	96.01	95.58	60	61	61
8	96.06	95.56	60	60	60
9	96.06	95.59	61	60	59	67	61
10	96.19	95.62	60	60	59	67	61
11	96.25	95.71	60	60	60	67	62
12	96.33	95.73	61	61	60	67	62
13	96.36	95.73	61	61	60	67	62
14	96.36	95.65	62	62	61	67	63
15	96.3	95.64	62	62	63	67	63
16	96.23	95.65	62	62	65	67	63
17	96.21	95.66	62	62	65	67	63
18	96.21	95.67	62	62	65	67	63
19	96.21	95.68	61	61	64	68	63
20	96.24	95.7	60	60	64	68	63
21	96.2	95.71	60	60	63	68	63
22	96.25	95.75	60	60	61	68	63
23	96.28	95.76	60	60	59	68	63
24	96.26	95.79	60	60	59	66	63
25	96.27	95.66	60	60	59	66	63
26	96.26	95.72	60	60	59	66	63
27	96.26	95.76	60	60	59	66	63
28	96.25	95.79	60	60	60	66	63
29	96.23	95.75	61	61	61	66	63
30	96.23	95.69	61	61	61	66	64
31	96.24	95.73	61	61	62	66	64
32	96.26	95.76	61	61	62	66	64
33	96.2	95.74	61	61	61	66	64
34	96.2	95.75	61	60	61	66	64
35	96.21	95.76	61	61	61	66	64
36	96.21	95.79	61	61	61	66	64
37	96.2	95.8	61	61	61	66	63
38	96.21	95.8	61	60	61	66	64
39	96.2	95.79	60	60	61	66	64
40	96.19	95.81	60	60	61	66	64
41	96.19	95.87	60	60	60	66	64
42	96.25	95.89	60	60	60	66	64
43	96.26	95.85	60	60	60	66	64
44	96.28	95.88	60	60	60	66	64
45	96.29	95.77	60	60	60	66	64
46	96.28	95.86	60	60	60	66	64
47	96.28	95.9	60	60	60	66	64
48	96.28	95.94	60	60	60	66	64
49	96.33	95.94	60	60	61	66	64
50	96.34	95.93	60	60	61	66	64
51	96.32	95.89	60	60	61	66	64
52	96.27	95.86	60	60	60	66	64
53	96.27	95.85	60	60	60	66	64
54	96.23	95.81	60	60	60	66	64
55	96.2	95.8	60	60	60	66	64
56	96.18	95.77	60	60	60	66	64
57	96.18	95.75	60	60	61	66	64
58	96.16	95.72	61	61	61	66	64
59	96.14	95.68	61	61	61	66	66
60	96.1	95.61	61	62	61	66	68
61	96.03	95.52	62	62	62	66	69
62	96.02	95.51	63	63	63	66	69
63	96.03	95.51	63	63	65	66	69
64	96.02	95.52	64	64	67	66	70
65	96	95.52	64	64	67	66	70
66	95.95	95.49	64	64	67	66	69
67	95.88	95.44	64	64	67	66	69
68	95.8	95.44	63	64	67	66	69
69	95.69	95.41	63	63	67	66	69
70	95.61	95.41	62	67	66	66	69
71	95.64	95.42	61	65	64	66	69
72	95.73	95.52	61	64	60	66	69
73	95.79	95.58	61	64	58	66	69
74	95.89	95.62	60	63	58	66	69
75	95.87	95.53	60	62	58	66
76	95.96	95.55	60	62	59	66
77	96.02	95.56	60	62	59	66
78	96.04	95.53	60	61	59	66
79	96.04	95.52	60	61	59	66
80	96.05	95.55	60	61	60	66
81	96.04	95.6	60	61	60	66
82	96.05	95.63	60	60	60	67
83	96.04	95.68	59	60	60	67
84	96.04	95.7	59	60	59	67
85	96.05	95.72	59	59	59	67
86	96.12	95.79	59	59	58	66
87	96.17	95.86	58	59	58	66
88	96.2	95.83	59	59	58	66
89	96.27	95.87	59	59	58	66
90	96.32	95.91	59	59	59	66
91	96.36	95.9	59	59	60	67
92	96.31	95.9	59	59	59	67
93	96.36	95.9	59	59	59	67
94	96.39	95.91	59	59	59	67
95	96.36	95.86	59	59	59	67
96	96.31	95.86	59	59	59	67
97	96.27	95.84	59	59	59	67
98	96.21	95.79	59	59	59	67
99	96.18	95.77	59	59	60	67
100	96.17	95.76	59	59	59	67
101	96.14	95.76	59	59	59	67
102	96.14	95.76	59	59	59	67
103	96.13	95.77	58	58	59	67
104	96.14	95.77	58	58	58	67
105	96.14	95.83	58	58	56	67
106	96.23	95.84	58	57	56	66
107	96.24	95.91	57	57	56	66
108	96.26	95.92	57	57	57	66
109	96.28	95.92	58	58	57	66
110	96.29	95.9	58	58	58	66
111	96.29	95.87	58	58	59	66
112	96.27	95.82	58	58	60	66
113	96.23	95.78	58	59	60	66
114	96.2	95.74	59	59	60	66
115	96.17	95.71	59	59	60	67
116	96.13	95.68	58	59	59	67
117	96.1	95.67	59	58	59	67
118	96.07	95.66	59	59	59	67
119	96.04	95.63	59	59	59	67
120	96.03	95.63	59	59	59	67
121	96.02	95.64	60	60	59	67
122	96	95.65	60	60	59	67
123	95.99	95.65	60	60	60	67
124	95.98	95.71	59	59	60	67
125	96.03	95.77	59	59	60	66
126	96.03	95.8	59	59	60	66
127	96.02	95.78	59	59	60	66
128	96.03	95.77	59	59	59	66
129	96.03	95.76	59	59	58	66
130	96.01	95.78	59	59	58	66
131	96.03	95.78	59	59	59	66
132	96.07	95.81	59	59	59	66
133	96.08	95.82	59	59	59	66
134	96.06	95.81	59	59	59	66
135	96.08	95.8	59	59	59	66
136	96.1	95.77	59	59	60	66	65
137	96.1	95.78	60	60	60	66	65
138	96.08	95.78	60	60	60	66	65
139	96.04	95.77	60	60	60	66	65
140	95.99	95.77	59	59	60	66	65
141	95.98	95.83	59	59	60	66	65
142	95.99	95.82	60	60	60	66	65
143	96.01	95.84	60	60	60	66	65
144	96.05	95.84	60	60	60	66	65
145	96.08	95.89	60	60	60	66	65
146	96.07	95.88	60	60	61	66	65
147	96.06	95.87	61	61	62	66	65
148	96.1	95.96	61	61	62	66	65
149	96.14	95.94	61	61	62	65	65
150	96.13	96	61	61	62	65	65
151	96.17	96.01	62	62	62	65	65
152	96.2	96.03	62	62	63	65	65
153	96.2	96.03	62	62	63	65	65
154	96.15	95.96	62	62	63	65	65
155	96.07	95.87	62	62	63	65	64
156	96.02	95.86	62	62	63	65	64
157	95.98	95.82	62	61	62	65	64
158	95.95	95.8	61	61	61	65	64
159	95.91	95.84	62	62	61	65	64
160	95.96	95.85	62	62	61	65	64
161	96.04	95.86	61	61	61	65	64
162	96.08	95.77	61	61	61	65	64
163	96.05	95.71	61	61	61	65	64
164	96	95.59	61	61	61	65	64
165	95.96	95.47	60	60	60	65	64
166	95.9	95.34	60	60	59	65	64
167	95.86	95.22	60	60	58	65	64
168	95.68	95.01	60	60	58	65	64
169	95.46	94.88	60	60	58	65	64
170	95.3	94.92	60	60	59	65	64
171	95.3	95.04	60	60	59	65	65
172	95.44	95.22	60	60	60	65	64
173	95.62	95.45	60	60	60	66	64
174	95.86	95.71	60	60	59	66	64
175	96.08	95.88	59	60	59	66	64
176	96.28	96.04	60	60	59	66	64
177	96.43	96.16	60	60	59	66	65
178	96.52	96.17	60	60	60	67	65
179	96.58	96.16	60	60	60	67	65
180	96.68	96.12	60	60	60	67	65
181	96.67	96.12	60	60	60	67	65
182	96.66	96.13	60	60	60	67	65
183	96.64	96.17	60	60	60	67	65
184	96.64	96.2	59	59	59	67	65
185	96.64	96.23	59	59	59	67	65
186	96.62	96.22	59	59	59	67	65
187	96.63	96.23	59	59	59	67	65
188	96.63	96.22	59	59	59	66	65
189	96.64	96.23	60	60	59	66	65
190	96.68	96.25	60	60	60	66	66
191	96.69	96.25	60	60	60	66	66
192	96.7	96.24	60	60	60	66	66
193	96.7	96.26	60	60	60	68	66
194	96.69	96.26	60	60	60	68	66
195	96.69	96.27	60	60	60	68	65
196	96.67	96.25	60	60	60	68	65
197	96.6	96.22	60	60	60	0	65
198	96.57	95.97	59	59	60	0	65
199	96.63	95.88	59	59	59	0	65
200	96.64	95.85	60	60	60	0	65
201	96.69	95.94	60	60	60	0	65
202	96.71	95.99	61	61	61	0	65
203	96.42	95.9	61	63	63	0	65
204	96.26	95.8	62	63	67	0	65
205	96.18	95.76	63	63	67	0	65
206	96.12	95.73	63	63	67	0	65
207	96.01	95.68	63	63	67	0	65
208	95.82	95.68	63	62	66	0	65
209	95.86	95.82	62	62	65	0	65
210	95.99	95.98	62	62	63	0	65
211	96.07	96.16	62	61	60	0	65
212	96.21	96.35	61	61	60	0	65
213	96.36	96.52	61	61	60	0	65
214	96.47	96.65	61	61	60	0	65
215	96.54	96.74	61	60	60	0	65
216	96.61	96.8	60	60	60	0	65
217	96.64	96.84	60	60	59	0	65
218	96.64	96.86	60	60	59	0	65
219	96.69	96.89	60	60	59	0	65
220	96.72	96.92	59	59	59	0	65
221	96.76	96.9	59	59	58	0	65
222	96.8	96.89	59	59	57	0	65
223	96.84	96.89	59	59	57	0	65
224	96.87	96.89	59	59	57	0	65
225	96.89	96.88	59	59	58	0	65
226	96.89	96.91	59	59	58	0	65
227	96.93	96.98	59	59	59	0	65
228	96.91	96.99	60	60	61	0	66
229	96.84	96.93	60	60	61	0	66
230	96.77	96.87	60	60	61	0	66
231	96.71	96.82	60	60	61	0	66
232	96.67	96.79	60	60	60	0	66
233	96.62	96.8	59	59	60	0	66
234	96.58	96.79	59	59	59	0	66
235	96.57	96.77	59	59	58	0	66
236	96.52	96.74	59	59	58	0	65
237	96.48	96.7	59	59	58	0	65
238	96.45	96.65	59	59	58	0	65
239	96.44	96.64	59	59	58	0	65
240	96.42	96.62	59	59	59	0	65
241	96.38	96.57	59	59	59	0	65
242	96.33	96.5	59	59	59	0	65
243	96.3	96.39	59	59	59	0	65
244	96.25	96.36	59	59	59	0	64
245	96.21	96.36	58	59	59	0	64
246	96.21	96.34	58	58	58	0	64
247	96.2	96.32	59	59	58	0	65
248	96.19	96.3	59	59	58	0	65
249	96.16	96.28	59	59	58	0	65
250	96.15	96.29	59	59	59	0	65
251	96.14	96.31	59	59	60	0	65
252	96.13	96.34	59	59	60	0	65
253	96.12	96.32	59	59	60	0	65
254	96.1	96.34	60	59	60	0	65
255	96.1	96.36	60	60	60	0	65
256	96.11	96.42	60	60	60	0	65
257	96.13	96.47	60	60	60	0	66
258	96.16	96.51	60	60	60	0	66
259	96.19	96.54	61	61	61	0	67
260	96.2	96.57	61	61	62	0	68
261	96.21	96.72	60	60	61	0	68
262	96.19	96.71	60	60	61	0	68
263	96.18	96.7	60	60	61	66	67
264	96.16	96.7	60	60	61	66	67
265	96.19	96.67	60	59	60	66	67
266	96.21	96.67	60	60	59	66	67
267	96.22	96.66	60	60	59	66	67
268	96.22	96.66	60	60	59	66	67
269	96.24	96.65	60	60	59	66	67
270	96.26	96.64	60	60	60	66	67
271	96.25	96.61	60	61	61	66	67
272	96.24	96.6	61	61	61	66	67
273	96.23	96.58	61	61	62	67	67
274	96.19	96.55	62	62	64	67	67
275	96.16	96.44	62	62	65	67	67
276	96.1	96.35	62	63	65	67	67
277	96.02	96.31	63	63	65	67	67
278	95.93	96.17	63	63	65	68	67
279	95.86	95.97	63	62	65	68	66
280	95.73	95.84	62	62	64	68	66
281	95.7	95.82	62	62	63	68	66
282	95.7	95.89	62	62	61	68	66
283	95.7	95.94	62	62	61	68	66
284	95.64	95.98	62	63	61	68	66
285	95.68	96.05	63	62	62	68	66
286	95.69	96.11	62	62	62	68	66
287	95.66	96.12	62	62	62	68	66
288	95.59	96.07	62	61	62	68	66
289	95.52	95.98	61	61	62	68	66
290	95.44	95.88	61	61	61	68	66
291	95.3	95.77	61	61	60	68	66
292	95.23	95.83	60	60	60	68	66
293	95.37	95.99	60	60	60	68	65
294	95.54	96.19	60	60	61	68	65
295	95.72	96.33	60	60	61	68	65
296	95.88	96.44	60	60	61	68	65
297	96.01	96.56	60	60	61	67	65
298	96.11	96.66	60	60	61	67	65
299	96.18	96.79	60	61	60	67	65
300	96.33	96.95	61	61	60	67	65
301	96.51	97.11	61	61	60	67	65
302	96.72	97.28	61	61	61	67	64
303	96.95	97.45	61	61	61	67	65
304	97.15	97.57	61	61	61	67	65
305	97.31	97.66	61	61	61	67	65
306	97.43	97.72	61	61	61	68	65
307	97.52	97.75	61	61	61	68	65
308	97.57	97.75	61	61	61	68	65
309	97.59	97.73	61	61	61	68	65
310	97.6	97.71	61	61	61	68	65
311	97.58	97.71	61	61	62	68	65
312	97.54	97.67	61	62	62	68	65
313	97.5	97.66	62	62	62	68	66
314	97.45	97.55	62	62	62	68	66
315	97.4	97.53	62	62	62	68	66
316	97.35	97.53	62	62	62	67	66
317	97.34	97.54	62	62	62	67	66
318	97.28	97.5	63	62	62	67	65
319	97.19	97.52	63	63	63	67	65
320	97.15	97.53	63	63	64	67	65
321	97.08	97.48	63	63	64	67	65
322	97.05	97.44	63	63	64	67	65
323	97.04	97.46	63	63	64	67	65
324	97.05	97.47	63	63	64	67	65
325	97.07	97.51	63	63	64	67	64
326	97.11	97.53	63	63	64	67	63
327	97.14	97.54	63	63	65	67	63
328	97.15	97.52	63	63	66	67	63
329	97.13	97.48	63	63	69	67	63
330	97.1	97.41	63	63	69	67	63
331	97.07	97.35	63	63	68	68	63
332	97.01	97.25	63	63	68	68	63
333	96.92	97.14	62	62	66	68	63
334	96.85	97.07	62	62	63	68	63
335	96.79	97.04	62	62	61	67	63
336	96.77	97.03	62	62	61	67	62
337	96.78	97.03	61	61	60	67	62
338	96.79	97.02	61	61	60	67	63
339	96.78	97	61	61	60	67	63
340	96.76	96.96	61	61	60	67	63
341	96.74	96.92	61	61	60	67	63
342	96.7	96.84	61	61	60	67	63
343	96.67	96.79	61	61	61	67	63
344	96.65	96.75	61	61	61	67	63
345	96.62	96.75	61	61	61	68	63
346	96.59	96.65	61	61	61	68	63
347	96.59	96.61	61	61	61	68	63
348	96.59	96.53	63	61	61	68	63
349	96.55	96.51	63	61	61	68	63
350	96.51	96.52	63	61	61	67	63
351	96.48	96.52	62	61	61	67	63
352	96.48	96.54	62	61	61	67	63
353	96.48	96.54	62	61	61	67	63
354	96.49	96.58	62	61	61	67	63
355	96.49	96.64	62	62	61	67	63
356	96.5	96.64	62	62	62	67	63
357	96.51	96.63	62	62	62	67	63
358	96.52	96.6	62	62	63	67	63
359	96.51	96.57	63	62	63	67	63
360	96.46	96.56	63	62	63	67	63
361	96.44	96.52	62	62	63	67	63
362	96.39	96.46	62	62	63	67	63
363	96.34	96.41	62	62	63	67	63
364	96.27	96.34	62	62	62	67	63
365	96.25	96.31	62	62	62	67	63
366	96.22	96.26	62	62	62	67	63
367	96.22	96.23	63	62	62	67	64
368	96.21	96.22	63	63	62	67	64
369	96.24	96.29	63	63	63	67	64
370	96.29	96.36	63	63	64	67	64
371	96.34	96.45	63	63	64	67	64
372	96.36	96.5	63	63	64	67	64
373	96.36	96.56	64	64	64	67	64
374	96.42	96.67	64	65	64	69	64
375	96.5	96.73	65	65	65	69	64
376	96.52	96.79	65	66	65	69	64
377	96.61	96.87	66	66	66	69	65
378	96.65	96.94	66	66	68	69	65
379	96.72	96.98	66	66	69	70	65
380	96.82	97.01	67	67	69	70	65
381	96.92	97.11	67	67	68	70	66
382	96.98	97.12	66	66	68	70	66
383	97.02	97.12	66	66	68	70	66
384	97.03	97.08	66	65	67	70	66
385	97.03	97.07	65	65	65	70	67
386	97.03	97.02	65	65	63	70	67
387	96.98	96.92	65	64	63	70	67
388	96.91	96.8	64	64	62	71	67
389	96.85	96.69	64	64	62	71	67
390	96.83	96.71	64	64	62	71	67
391	96.78	96.71	64	64	62	71	67
392	96.79	96.71	64	64	63	71	67
393	96.8	96.71	63	63	63	70	67
394	96.82	96.73	63	63	62	70	67
395	96.82	96.7	63	63	62	70	66
396	96.82	96.71	62	62	62	70	66
397	96.83	96.71	61	61	61	70	66
398	96.84	96.72	61	61	59	70	66
399	96.82	96.69	61	61	59	70	66
400	96.84	96.7	61	61	59	70	66
401	96.87	96.72	61	61	59	70	66
402	96.89	96.75	61	61	59	70	66
403	96.92	96.77	61	61	60	70	66
404	96.95	96.78	61	61	61	70	65
405	96.96	96.78	61	61	62	70	65
406	96.95	96.75	62	62	62	70	65
407	96.93	96.72	62	62	62	70	65
408	96.92	96.71	61	61	62	70	64
409	96.9	96.7	61	61	62	70	64
410	96.89	96.69	61	61	62	70	64
411	96.87	96.69	61	61	62	70	64
412	96.86	96.7	62	62	62	69	64
413	96.87	96.7	62	62	62	69	64
414	96.88	96.71	61	61	62	69	64
415	96.9	96.75	61	61	62	69	64
416	96.94	96.81	61	61	62	69	64
417	97	96.88	61	61	62	69	64
418	97.06	96.93	61	61	61	69	64
419	97.1	96.97	61	61	60	69	63
420	97.12	96.99	60	60	60	69	63
421	97.13	97	60	60	60	69	63
422	97.15	97.03	60	60	60	68	63
423	97.17	97.02	61	61	60	68	63
424	97.17	96.99	61	61	60	68	63
425	97.14	96.93	61	61	61	68	63
426	97.06	96.87	61	61	62	68	63
427	97.02	96.87	61	61	62	68	63
428	96.97	96.73	62	62	62	68	63
429	96.91	96.65	62	62	62	68	63
430	96.83	96.58	62	62	63	68	64
431	96.77	96.52	62	62	63	68	63
432	96.73	96.52	62	62	63	68	63
433	96.71	96.48	62	62	63	68	63
434	96.69	96.47	62	62	63	68	63
435	96.67	96.45	62	62	62	68	63
436	96.67	96.45	62	62	62	68	63
437	96.63	96.43	62	62	62	68	63
438	96.63	96.44	62	62	62	68	63
439	96.61	96.47	62	62	62	68	64
440	96.6	96.47	62	62	62	68	64
441	96.58	96.51	62	62	63	69	64
442	96.55	96.51	62	62	63	69	65
443	96.52	96.5	62	62	63	69	65
444	96.5	96.5	62	62	62	69	65
445	96.5	96.48	62	62	62	69	65
446	96.49	96.46	62	62	62	70	65
447	96.47	96.41	63	63	62	70	66
448	96.45	96.36	63	63	63	70	66
449	96.45	96.36	63	63	63	70	66
450	96.45	96.36	63	63	63	70	66
451	96.43	96.37	63	63	64	70	66
452	96.41	96.38	63	63	64	70	66
453	96.37	96.38	63	63	64	70	66
454	96.37	96.46	62	62	64	70	66
455	96.37	96.49	62	62	63	70	66
456	96.38	96.5	62	62	62	70	66
457	96.38	96.5	62	61	60	70	66
458	96.4	96.5	61	61	60	70	66
459	96.43	96.52	61	61	60	70	66
460	96.44	96.51	61	61	61	70	66
461	96.46	96.5	61	62	61	69	66
462	96.47	96.5	62	62	62	69	66
463	96.49	96.5	62	62	62	69	67
464	96.51	96.48	61	62	62	69	67
465	96.52	96.45	62	62	62	70	67
466	96.5	96.42	62	62	62	70	67
467	96.49	96.38	62	62	62	70	67
468	96.47	96.35	62	62	62	70	67
469	96.46	96.31	61	61	62	70	67
470	96.43	96.31	62	61	62	69	67
471	96.41	96.29	62	62	62	69	67
472	96.4	96.27	62	62	62	69	67
473	96.4	96.22	62	62	62	69	67
474	96.39	96.22	62	62	62	69	67
475	96.38	96.18	62	62	62	70	67
476	96.39	96.16	63	63	62	70	67
477	96.41	96.16	62	62	63	70	67
478	96.41	96.16	62	62	63	70	67
479	96.4	96.16	62	62	63	70	67
480	96.39	96.18	62	62	63	70	69
481	96.38	96.22	62	62	62	70	69
482	96.41	96.26	62	62	62	70	69
483	96.43	96.26	62	62	62	70	69
484	96.43	96.28	62	62	62	70	69
485	96.43	96.3	63	63	62	70	69
486	96.44	96.3	63	63	63	70	69
487	96.46	96.3	63	63	63	70	69
488	96.45	96.3	63	63	63	70	70
489	96.44	96.3	63	63	63	70	74
490	96.44	96.3	63	63	63	70	74
491	96.43	96.28	63	63	63	70	74
492	96.41	96.23	63	63	63	70	74
493	96.41	96.23	63	63	63	70	74
494	96.41	96.2	62	62	63	70	74
495	96.39	96.18	63	63	63	70	74
496	96.37	96.18	63	63	62	70	74
497	96.35	96.15	63	63	62	70	74
498	96.35	96.15	62	62	62	70	74
499	96.35	96.17	62	62	62	70	74
500	96.34	96.22	63	63	62	70	74
501	96.34	96.22	62	63	62	70	74
502	96.36	96.27	62	62	62	70	73
503	96.35	96.28	62	62	62	70	73
504	96.37	96.28	61	62	61	69	73
505	96.37	96.29	61	62	60	69	72
506	96.38	96.32	61	62	60	69	72
507	96.39	96.39	61	61	60	69	72
508	96.38	96.41	61	61	60	69	73
509	96.36	96.41	61	61	60	69	73
510	96.33	96.41	61	61	60	69	73
511	96.3	96.41	61	61	60	69	73
512	96.3	96.46	60	61	60	69	73
513	96.3	96.49	61	61	60	69	73
514	96.3	96.49	60	61	60	69	73
515	96.33	96.48	60	61	60	69	73
516	96.33	96.46	60	60	60	69	73
517	96.33	96.44	60	60	60	69	73
518	96.32	96.41	60	60	60	68	72
519	96.31	96.41	60	60	60	68	73
520	96.29	96.37	60	60	60	68	73
521	96.28	96.33	60	60	60	68	73
522	96.27	96.31	61	61	61	68	73
523	96.25	96.31	61	61	61	69	73
524	96.24	96.29	61	61	61	69	73
525	96.22	96.29	60	60	61	69	72
526	96.2	96.28	60	60	61	69	72
527	96.16	96.28	61	60	61	69	72
528	96.14	96.28	61	61	61	69	71
529	96.14	96.33	61	61	61	69	71
530	96.12	96.32	60	61	61	69	71
531	96.08	96.32	61	61	61	69	70
532	96.03	96.27	61	61	61	69	70
533	96.01	96.15	60	61	60	69	70
534	95.99	96.16	60	60	60	69	69
535	96.03	96.16	60	60	60	69	69
536	96.06	96.22	60	60	60	69	69
537	96.08	96.28	60	60	60	69	69
538	96.03	96.22	60	60	60	68	69
539	96.05	96.33	60	60	61	68	69
540	96.14	96.33	61	60	61	68	69
541	96.2	96.39	61	61	61	68	69
542	96.22	96.43	60	61	61	69	68
543	96.23	96.42	60	60	61	69	68
544	96.22	96.42	61	60	61	69	68
545	96.19	96.41	61	61	61	69	68
546	96.13	96.34	61	61	61	69	68
547	96.1	96.3	61	61	61	68	68
548	96.1	96.32	61	61	61	68	68
549	96.11	96.32	61	61	61	68	68
550	96.11	96.34	61	61	61	68	68
551	96.13	96.35	61	61	61	68	68
552	96.2	96.46	61	61	61	67	68
553	96.26	96.46	61	61	61	67	68
554	96.27	96.5	61	61	61	67	68
555	96.26	96.51	61	61	62	67	68
556	96.26	96.45	61	61	62	67	68
557	96.27	96.45	61	61	61	68	68
558	96.26	96.41	61	61	61	68	68
559	96.23	96.39	61	61	61	68	68
560	96.18	96.19	61	61	61	68	68
561	96.18	96.19	61	61	61	68	67
562	96.18	96.16	61	61	61	68	67
563	96.19	96.15	60	60	60	68	68
564	96.19	96.13	61	61	60	68	67
565	96.17	96.13	61	61	60	68	67
566	96.15	96.1	61	61	61	68	67
567	96.12	96.07	61	61	61	68	67
568	96.08	96.02	61	61	61	68	67
569	96.03	95.92	61	61	61	68	67
570	96	95.92	61	61	60	68	67
571	95.98	95.89	60	61	60	68	67
572	95.96	95.87	60	60	60	68	67
573	95.94	95.86	61	60	60	68	67
574	95.91	95.8	61	61	60	68	67
575	95.9	95.8	61	61	60	68	67
576	95.92	95.82	61	61	61	69	67
577	95.86	95.84	61	61	61	69	67
578	95.85	95.84	61	61	61	69	67
579	95.86	95.84	61	61	61	69	67
580	95.88	95.89	61	61	61	69	67
581	95.89	95.91	62	61	61	69	67
582	95.88	95.94	62	62	61	69	67
583	95.87	95.94	62	62	62	69	68
584	95.86	95.94	62	62	63	69	68
585	95.83	95.94	62	62	63	69	68
586	95.8	95.93	62	62	63	69	68
587	95.78	95.86	62	62	62	69	67
588	95.78	95.86	62	62	62	69	67
589	95.81	95.91	62	62	62	69	67
590	95.84	95.96	62	62	62	69	67
591	95.87	96.02	62	62	62	68	67
592	95.87	96.03	62	62	62	68	67
593	95.86	96.02	63	63	62	68	67
594	95.83	95.98	63	63	63	68	67
595	95.82	95.94	63	63	64	69	67
596	95.8	95.94	63	63	64	69	67
597	95.79	95.94	64	63	64	69	67
598	95.78	95.94	64	64	64	69	67
599	95.8	95.97	64	64	64	69	67
600	95.83	96.01	64	64	64	69	67
601	95.87	96.06	63	64	64	69	67
602	95.91	96.12	63	63	64	69	67
603	95.95	96.16	64	63	64	69	67
604	95.97	96.16	64	64	64	69	67
605	96	96.16	63	64	64	68	67
606	96.07	96.23	63	63	64	68	67
607	96.12	96.28	64	63	64	68	67
608	96.16	96.28	64	64	64	68	67
609	96.17	96.25	64	64	64	68	67
610	96.12	96.21	64	64	64	68	67
611	96.04	96.15	64	64	64	68	67
612	95.93	96.05	64	64	64	68	67
613	95.79	95.92	64	63	64	68	67
614	95.62	95.79	63	63	63	68	67
615	95.44	95.66	63	63	62	68	67
616	95.25	95.49	63	63	62	68	67
617	95.1	95.28	63	63	63	68	67
618	94.98	95.11	63	63	63	68	67
619	94.87	94.98	63	63	63	68	67
620	94.75	94.88	63	63	63	68	67
621	94.62	94.78	63	63	63	68	67
622	94.5	94.64	63	63	63	68	67
623	94.41	94.52	63	63	63	68	67
624	94.3	94.45	63	63	63	68	67
625	94.19	94.33	63	63	63	68	67
626	94.07	94.25	63	63	63	68	66
627	93.99	94.15	63	63	63	68	66
628	93.91	94.06	63	63	63	68	66
629	93.8	93.94	63	63	63	67	66
630	93.67	93.79	63	63	63	67	65
631	93.56	93.66	64	63	63	67	65
632	93.47	93.52	64	64	63	67	65
633	93.36	93.41	64	64	64	67	66
634	93.22	93.32	64	64	65	67	66
635	93.1	93.17	64	64	65	67	66
636	92.99	93.06	64	64	65	67	66
637	92.84	92.94	64	64	65	67	65
638	92.7	92.85	63	64	64	67	65
639	92.58	92.73	63	63	64	66	65
640	92.5	92.6	63	63	63	66	65
641	92.45	92.52	63	63	63	66	65
642	92.38	92.46	63	63	63	66	65
643	92.27	92.41	64	64	63	66	65
644	92.18	92.33	64	64	63	66	65
645	92.11	92.25	64	64	63	66	65
646	92.01	92.14	64	64	64	66	65
647	91.93	92.03	65	64	65	66	65
648	91.79	91.88	65	65	66	65	65
649	91.65	91.69	65	65	66	65	65
650	91.53	91.56	65	65	67	65	65
651	91.41	91.46	65	65	67	65	65
652	91.28	91.23	66	65	67	65	64
653	91.12	91.08	65	66	67	65	64
654	91.06	90.97	65	65	66	65	64
655	90.87	90.82	66	65	66	65	64
656	90.58	90.67	66	66	66	65	64
657	90.37	90.48	66	66	66	65	64
658	90.2	90.37	66	66	66	65	64
659	90.14	90.25	66	66	66	65	64
660	90.01	90.17	66	66	66	65	64
661	89.89	89.99	66	66	66	65	64
662	89.84	89.83	66	66	66	65	64
663	89.8	89.78	66	66	67	65	64
664	89.73	89.73	67	67	67	65	64
665	89.66	89.67	67	67	68	65	64
666	89.6	89.61	66	67	68	65	64
667	89.52	89.59	66	66	68	65	64
668	89.44	89.55	66	66	67	64	64
669	89.37	89.57	66	66	67	64	63
670	89.35	89.54	66	66	66	64	63
671	89.33	89.53	66	66	65	64	63
672	89.34	89.6	66	66	65	64	63
673	89.3	89.53	66	66	65	64	63
674	89.2	89.42	66	66	65	64	63
675	89.17	89.28	67	67	65	64	63
676	89.1	89.19	67	67	66	64	64
677	89.05	89.15	67	67	67	64	64
678	88.99	89.12	68	67	69	64	64
679	88.9	89.02	67	68	68	64	63
680	88.82	88.99	67	67	68	64	63
681	88.76	88.92	67	67	68	64	63
682	88.69	88.89	67	67	68	63	63
683	88.62	88.84	67	66	67	63	63
684	88.6	88.8	67	67	66	63	63
685	88.59	88.86	67	67	66	63	63
686	88.66	88.89	67	67	66	63	63
687	88.69	88.93	67	67	66	63	63
688	88.67	88.84	68	67	67	63	63
689	88.63	88.71	68	68	68	63	63
690	88.44	88.55	68	68	69	63	63
691	88.3	88.42	68	68	69	63	63
692	88.22	88.35	68	68	69	62	63
693	88.2	88.27	68	68	68	62	63
694	88.2	88.19	68	68	68	62	63
695	88.23	88.16	68	68	68	62	63
696	88.23	88.11	68	68	68	62	63
697	88.17	87.98	68	68	68	62	63
698	88.07	87.89	68	68	68	62	63
699	88	87.85	68	68	68	62	63
700	87.89	87.75	68	68	68	62	63
701	87.75	87.61	68	68	68	63	63
702	87.67	87.52	68	68	68	63	63
703	87.58	87.4	69	69	68	63	63
704	87.43	87.29	69	69	69	63	63
705	87.31	87.18	69	69	69	63	63
706	87.2	87.07	70	69	70	63	63
707	87.11	86.97	70	70	72	63	63
708	86.98	86.84	70	70	72	63	63
709	86.88	86.77	70	70	71	63	62
710	86.72	86.71	69	69	71	63	62
711	86.63	86.68	69	69	71	62	62
712	86.53	86.63	69	69	70	62	62
713	86.43	86.56	68	69	68	62	62
714	86.35	86.49	68	68	67	62	61
715	86.28	86.4	68	68	67	62	61
716	86.13	86.23	68	68	66	61	61
717	86.13	86.15	68	68	67	61	61
718	85.98	86.07	69	68	67	61	61
719	85.94	86.02	69	69	67	61	61
720	85.85	85.97	69	69	67	61	61
721	85.76	85.92	70	69	68	61	61
722	85.67	85.78	70	69	70	61	61
723	85.59	85.72	69	69	70	61	61
724	85.46	85.63	69	69	70	61	61
725	85.37	85.57	69	69	70	60	61
726	85.25	85.49	69	69	69	60	61
727	85.22	85.45	69	69	69	60	61
728	85.2	85.43	70	69	69	60	61
729	85.17	85.45	70	70	69	60	61
730	85.1	85.33	70	70	69	60	61
731	85.02	85.21	70	70	70	60	61
732	84.92	85.09	71	70	71	60	61
733	84.86	84.98	71	71	72	60	61
734	84.76	84.79	71	71	72	60	61
735	84.5	84.62	71	71	72	59	60
736	84.3	84.46	71	71	72	59	60
737	84.18	84.37	71	71	72	59	60
738	84.07	84.26	71	71	72	59	60
739	83.94	84.11	71	71	71	59	60
740	83.84	84	72	71	71	59	60
741	83.79	83.91	72	72	72	59	60
742	83.73	83.89	73	72	72	59	60
743	83.67	83.8	73	73	72	59	60
744	83.54	83.69	73	73	73	59	60
745	83.44	83.63	74	73	75	59	60
746	83.36	83.56	74	74	75	59	60
747	83.25	83.44	74	74	75	59	60
748	83.1	83.39	74	74	75	59	60
749	82.99	83.34	75	74	75	58	60
750	82.92	83.07	75	75	75	58	60
751	82.84	83.01	75	75	76	58	60
752	82.69	82.89	75	75	76	58	60
753	82.58	82.81	75	75	76	58	60
754	82.5	82.73	76	75	76	58	60
755	82.32	82.51	76	76	76	58	59
756	82.08	82.28	76	75	76	58	59
757	81.9	82.09	76	76	76	58	59
758	81.77	81.91	76	75	76	58	59
759	81.56	81.76	76	76	76	57	59
760	81.41	81.66	76	76	76	57	59
761	81.29	81.57	76	76	76	57	59
762	81.21	81.41	76	76	77	57	59
763	81.09	81.34	76	76	77	57	59
764	81	81.28	76	76	77	56	59
765	80.93	81.18	76	76	77	56	59
766	80.75	80.96	77	77	77	56	59
767	80.58	80.83	78	77	77	56	59
768	80.46	80.74	78	77	78	56	59
769	80.28	80.55	78	78	79	56	59
770	80.1	80.41	78	78	79	56	59
771	79.98	80.29	78	78	79	56	59
772	79.81	80.15	78	78	79	56	59
773	79.6	80.02	78	78	79	56	59
774	79.52	79.95	79	78	79	55	58
775	79.46	79.95	79	79	79	55	58
776	79.34	79.77	79	79	79	55	58
777	79.34	79.73	79	79	79	55	58
778	79.22	79.62	79	79	80	55	58
779	79.01	79.48	79	79	80	55	58
780	78.94	79.38	80	79	81	55	58
781	78.85	79.19	80	80	81	55	58
782	78.85	79.02	80	80	81	55	58
783	78.77	78.91	80	80	81	55	58
784	78.6	78.91	79	80	80	55	58
785	78.33	78.83	79	80	80	55	58
786	78.14	78.71	79	80	79	55	58
787	78.05	78.46	79	80	78	55	57
788	77.92	78.46	79	80	78	55	57
789	77.82	78.19	80	80	78	55	57
790	77.74	78.06	80	80	79	55	57
791	77.58	78.04	79	80	79	55	57
792	77.5	78.02	79	80	79	55	57
793	77.47	77.97	79	80	79	54	57
794	77.42	77.85	79	79	79	54	57
795	77.39	77.81	78	79	79	54	57
796	77.42	77.83	78	79	79	54	57
797	77.4	77.8	79	79	78	54	57
798	77.33	77.71	79	79	78	53	57
799	77.23	77.58	79	79	78	53	57
800	77.05	77.31	80	80	78	53	57
801	76.84	77.08	80	80	78	53	57
802	76.66	76.9	80	80	79	53	57
803	76.45	76.68	80	80	81	53	57
804	76.18	76.47	79	80	81	53	56
805	75.99	76.32	79	79	80	53	56
806	75.86	76.13	79	79	80	53	56
807	75.69	76.03	79	79	80	52	56
808	75.56	76.01	79	79	79	52	56
809	75.48	75.96	80	79	79	52	56
810	75.44	75.97	79	79	79	52	56
811	75.41	75.97	79	79	79	52	56
812	75.41	75.89	80	80	80	51	56
813	75.45	75.82	80	80	81	51	56
814	75.37	75.65	80	80	81	51	56
815	75.31	75.54	80	80	81	51	56
816	75.2	75.47	80	80	81	51	56
817	75.08	75.43	80	80	81	52	56
818	74.97	75.32	81	81	81	52	56
819	74.84	75.19	81	81	81	52	56
820	74.74	75.08	81	81	81	52	56
821	74.56	74.86	81	81	81	52	56
822	74.4	74.75	81	81	82	51	56
823	74.29	74.64	81	81	82	51	56
824	74.15	74.59	81	81	82	51	56
825	74.06	74.57	81	81	82	51	55
826	74.04	74.5	81	81	81	50	55
827	74.02	74.52	81	81	81	50	55
828	73.97	74.53	82	81	81	50	55
829	74	74.6	82	82	81	50	55
830	74.04	74.57	82	82	82	50	55
831	74.04	74.52	82	82	82	50	55
832	73.87	74.26	82	82	83	50	55
833	73.74	74.12	82	82	83	50	55
834	73.58	73.9	82	82	83	50	55
835	73.26	73.71	83	82	83	50	55
836	73.26	73.55	83	83	83	50	55
837	73.15	73.37	83	83	83	50	55
838	73.1	73.25	83	83	83	50	55
839	72.99	73.09	84	83	83	50	55
840	72.64	73.01	84	84	84	50	55
841	72.66	73.12	84	84	85	49	55
842	72.58	73.13	83	84	85	49	55
843	72.5	73.08	83	84	85	49	55
844	72.42	72.95	83	83	85	49	55
845	72.33	72.84	83	83	85	49	55
846	72.29	72.82	83	83	84	49	55
847	72.24	72.77	83	83	83	49	55
848	72.14	72.68	83	83	83	49	55
849	72.04	72.58	83	83	83	49	55
850	71.88	72.42	83	83	83	49	55
851	71.75	72.32	84	83	84	49	55
852	71.66	72.32	84	84	84	49	54
853	71.57	72.15	84	84	85	49	54
854	71.57	72.13	85	84	85	49	54
855	71.51	72.22	85	85	86	48	54
856	71.54	72.26	85	85	86	48	54
857	71.53	72.14	85	85	86	48	54
858	71.46	72.03	85	85	86	48	54
859	71.37	71.84	86	86	86	48	54
860	71.18	71.59	86	86	86	48	54
861	71.03	71.24	85	85	86	48	54
862	70.73	71.11	85	85	85	48	54
863	70.62	71.06	85	85	84	48	54
864	70.57	71.03	85	85	84	48	54
865	70.69	71.13	84	85	84	48	54
866	70.69	71.23	84	84	84	48	54
867	70.83	71.37	84	84	84	48	54
868	70.88	71.42	84	84	84	48	54
869	70.96	71.64	84	84	83	48	54
870	70.99	71.72	84	84	83	48	54
871	71.04	71.78	84	84	84	48	54
872	71.17	71.93	84	84	84	48	54
873	71.26	72.04	84	84	84	48	54
874	71.44	72.26	84	84	84	48	54
875	71.59	72.37	84	84	84	48	54
876	71.75	72.47	84	84	83	48	54
877	71.87	72.47	84	84	84	48	54
878	71.91	72.5	84	84	84	48	54
879	71.93	72.46	84	84	84	48	54
880	71.96	72.36	84	84	84	48	54
881	71.97	72.27	84	84	84	48	54
882	71.86	72.1	83	83	84	48	54
883	71.73	72.02	83	83	83	48	54
884	71.66	71.99	84	84	84	47	54
885	71.64	72.04	84	84	84	47	54
886	71.69	72.13	85	84	84	47	54
887	71.74	72.2	85	85	84	47	54
888	71.8	72.2	85	85	85	47	54
889	71.84	72.17	85	85	87	48	54
890	71.86	72.14	85	85	87	48	54
891	71.96	72.22	86	86	87	48	54
892	71.97	72.18	86	86	87	48	54
893	71.95	72.15	86	86	87	48	54
894	72.02	72.2	86	86	87	48	55
895	72.09	72.23	86	86	86	48	54
896	72.09	72.09	86	85	85	48	54
897	71.94	72.09	85	85	85	48	54
898	72	72.18	85	86	85	48	54
899	72.04	72.2	86	86	85	48	54
900	71.99	72.17	86	86	86	48	54
901	71.8	72.07	86	86	86	48	54
902	71.75	72.06	86	86	86	48	54
903	71.82	72.15	86	86	86	48	54
904	71.81	72.19	86	86	87	47	54
905	71.74	72.1	87	86	87	47	54
906	71.64	71.95	86	86	87	47	54
907	71.52	71.81	87	86	87	47	54
908	71.43	71.76	86	87	87	47	54
909	71.4	71.74	87	87	87	47	54
910	71.32	71.69	87	87	87	47	54
911	71.29	71.62	87	87	87	47	54
912	71.31	71.61	87	87	87	47	54
913	71.36	71.64	87	87	87	47	54
914	71.38	71.63	87	87	87	47	54
915	71.42	71.7	87	87	87	47	54
916	71.55	71.77	87	87	87	47	54
917	71.52	71.7	87	87	87	47	54
918	71.52	71.68	87	86	87	47	54
919	71.47	71.71	86	86	86	47	54
920	71.45	71.69	87	86	86	47	54
921	71.42	71.62	87	86	86	47	54
922	71.37	71.58	87	87	86	47	54
923	71.3	71.57	87	87	86	47	53
924	71.25	71.62	87	87	87	47	53
925	71.25	71.73	87	87	87	47	53
926	71.27	71.78	87	87	87	47	53
927	71.26	71.78	87	87	87	47	53
928	71.17	71.76	87	87	87	46	53
929	71.15	71.75	87	87	86	46	53
930	71.16	71.69	87	87	86	46	53
931	71.14	71.62	87	87	87	46	53
932	71.02	71.45	87	87	87	46	53
933	70.91	71.37	87	87	87	46	53
934	70.91	71.39	87	87	87	46	53
935	70.75	71.37	87	87	87	46	53
936	70.71	71.33	87	86	87	46	53
937	70.69	71.54	87	87	87	46	53
938	70.69	71.54	87	87	86	46	53
939	70.8	71.58	86	86	85	46	53
940	70.81	71.53	86	86	85	46	53
941	70.79	71.4	86	86	84	46	53
942	70.72	71.27	86	86	84	45	53
943	70.67	71.13	86	86	85	45	53
944	70.51	70.99	86	86	85	45	53
945	70.46	71	86	86	85	45	53
946	70.35	70.94	86	86	86	45	53
947	70.29	70.93	87	86	87	46	53
948	70.24	70.94	87	87	88	46	53
949	70.2	70.95	87	87	88	46	53
950	70.2	71.04	87	87	88	46	53
951	70.29	71.11	87	87	89	46	53
952	70.41	71.19	88	88	89	46	53
953	70.48	71.14	88	88	89	45	53
954	70.55	71.03	88	88	89	45	53
955	70.55	70.9	88	88	90	45	53
956	70.35	70.75	89	89	90	45	53
957	70.35	70.5	89	89	90	44	53
958	69.9	70.23	88	89	89	44	53
959	69.71	70.07	88	89	89	44	53
960	69.59	69.91	88	88	89	44	53
961	69.59	69.92	88	88	88	45	53
962	69.33	69.85	87	87	86	45	53
963	69.34	69.87	87	87	86	45	53
964	69.35	69.88	87	87	86	45	53
965	69.35	69.98	87	87	86	45	53
966	69.42	70.05	87	87	86	45	53
967	69.51	70.13	88	88	87	45	53
968	69.54	70.14	88	88	88	45	53
969	69.56	70.21	87	88	88	45	53
970	69.56	70.28	87	87	88	45	53
971	69.59	70.35	86	87	88	45	53
972	69.63	70.33	86	86	88	45	53
973	69.68	70.32	86	86	87	45	53
974	69.68	70.34	86	86	86	45	53
975	69.74	70.37	87	86	86	45	53
976	69.8	70.52	87	87	86	44	53
977	69.89	70.62	87	87	86	44	53
978	69.89	70.6	87	87	86	44	53
979	70.05	70.5	88	88	87	44	53
980	69.98	70.28	87	87	88	44	53
981	69.98	69.99	87	87	88	44	53
982	69.63	69.87	87	87	88	44	53
983	69.29	69.56	87	87	87	44	53
984	69.16	69.46	87	87	87	44	53
985	69.16	69.53	87	87	86	44	53
986	68.98	69.56	87	87	86	44	53
987	69.01	69.6	87	87	86	44	53
988	68.95	69.59	87	87	86	44	53
989	68.95	69.6	87	87	86	44	53
990	68.93	69.66	87	87	87	44	53
991	68.9	69.73	87	87	88	44	53
992	68.95	69.73	87	87	88	44	53
993	68.95	69.74	87	87	88	44	53
994	69.01	69.71	87	87	88	44	53
995	69.03	69.75	87	87	88	44	53
996	69.04	69.78	87	87	88	44	52
997	69.04	69.74	87	87	88	44	52
998	69.08	69.76	88	88	88	44	52
999	69.23	69.76	88	88	89	44	52
1000	69.27	69.93	88	88	89	43	52
1001	69.27	69.97	88	88	89	43	52
1002	69.35	70.03	88	88	89	43	52
1003	69.51	70.11	88	88	89	43	52
1004	69.53	70.03	88	88	88	43	52
1005	69.4	69.88	88	88	88	43	52
1006	69.4	69.86	88	88	88	43	52
1007	69.24	69.78	88	88	88	43	52
1008	69.24	69.91	88	88	88	43	52
1009	69.24	69.86	88	88	88	43	52
1010	69.13	69.96	88	88	88	43	52
1011	69.27	69.94	88	88	88	43	52
1012	69.3	69.93	88	88	88	43	52
1013	69.3	69.98	88	88	88	43	52
1014	69.35	70.04	89	89	88	43	52
1015	69.37	70.08	89	89	89	43	52
1016	69.45	70.07	89	89	89	43	52
1017	69.44	70.11	88	88	89	43	52
1018	69.47	70.14	88	88	89	43	52
1019	69.53	70.19	88	88	89	43	52
1020	69.53	70.25	88	88	88	43	52
1021	69.59	70.2	88	88	88	43	52
1022	69.49	70.15	89	88	88	43	52
1023	69.52	70.17	89	89	88	43	53
1024	69.52	70.16	89	89	88	44	53
1025	69.48	70.13	89	89	89	44	53
1026	69.47	70.13	88	88	89	44	53
1027	69.46	70.17	88	88	89	44	53
1028	69.46	70.07	88	88	89	44	53
1029	69.47	70.03	88	88	88	44	53
1030	69.41	69.96	88	88	87	44	53
1031	69.29	69.96	88	88	87	44	53
1032	69.29	70.04	88	88	87	44	53
1033	69.29	70.04	88	88	87	44	52
1034	69.25	70.01	88	88	87	44	52
1035	69.33	70.05	87	88	87	44	52
1036	69.33	70.05	87	87	87	44	52
1037	69.37	70.13	87	87	87	44	52
1038	69.36	70.19	87	87	87	44	52
1039	69.48	70.26	86	87	86	44	52
1040	69.48	70.31	86	86	85	44	52
1041	69.5	70.29	86	86	85	44	52
1042	69.53	70.25	86	86	85	44	52
1043	69.5	70.22	86	86	85	44	52
1044	69.5	70.17	86	85	85	44	52
1045	69.48	70.2	85	85	85	44	52
1046	69.55	70.23	86	86	85	44	52
1047	69.78	70.28	86	86	85	44	52
1048	69.78	70.43	86	86	85	44	52
1049	69.87	70.57	86	86	86	44	52
1050	69.93	70.62	86	86	86	44	52
1051	69.98	70.67	86	86	86	44	52
1052	70.03	70.68	85	85	86	44	53
1053	70.02	70.5	85	85	86	43	53
1054	70	70.37	85	85	85	43	53
1055	69.77	70.34	85	85	84	43	53
1056	69.77	70.29	85	85	84	43	53
1057	69.71	70.27	85	85	84	43	53
1058	69.64	70.21	85	85	84	43	53
1059	69.53	70.18	85	85	85	43	52
1060	69.53	70.26	85	85	85	43	52
1061	69.55	70.37	85	85	85	43	52
1062	69.55	70.4	84	84	85	43	52
1063	69.55	70.4	84	84	84	43	52
1064	69.75	70.44	85	85	84	43	52
1065	69.75	70.51	85	85	84	43	52
1066	69.82	70.61	85	85	84	43	52
1067	69.91	70.6	84	84	85	44	52
1068	69.91	70.59	84	84	85	44	52
1069	69.89	70.6	84	84	84	44	52
1070	69.84	70.56	84	84	84	44	52
1071	69.8	70.46	84	84	84	44	52
1072	69.8	70.46	84	84	83	43	52
1073	69.76	70.55	84	84	84	43	52
1074	69.79	70.61	84	85	84	43	52
1075	69.85	70.67	85	85	84	43	52
1076	69.85	70.75	85	85	84	43	52
1077	69.9	70.72	86	86	85	43	52
1078	69.99	70.65	87	87	87	43	52
1079	70.03	70.61	87	87	89	43	53
1080	70.03	70.55	87	87	90	43	53
1081	69.94	70.5	88	87	90	43	53
1082	69.92	70.17	87	87	90	43	53
1083	69.69	69.95	87	87	89	43	53
1084	69.69	69.5	87	87	89	43	53
1085	69.41	69.13	86	86	88	43	53
1086	69.1	68.72	86	86	86	43	53
1087	68.32	68.54	86	86	85	43	53
1088	68.32	68.55	86	86	86	43	53
1089	68.18	68.68	87	86	86	43	53
1090	68.14	68.8	86	87	86	43	53
1091	68.19	68.89	87	87	86	43	53
1092	68.36	69.05	86	86	87	43	53
1093	68.47	69.36	87	87	87	43	53
1094	68.72	69.69	87	87	87	43	53
1095	68.93	69.95	87	87	87	43	53
1096	69.14	69.99	86	86	87	43	53
1097	69.31	69.97	86	86	87	43	53
1098	69.31	69.94	86	86	86	43	53
1099	69.31	69.98	86	86	86	43	53
1100	69.32	70.04	86	86	85	43	54
1101	69.36	69.98	86	86	85	44	54
1102	69.34	69.89	86	87	86	44	54
1103	69.29	69.82	87	87	86	44	54
1104	69.16	69.76	87	87	86	44	54
1105	69.12	69.73	86	86	87	44	54
1106	68.99	69.8	86	86	87	44	54
1107	68.97	69.86	86	85	87	44	54
1108	69.11	69.85	85	85	86	44	54
1109	69.23	69.86	85	85	86	44	54
1110	69.31	70.3	86	85	85	44	53
1111	68.88	70.76	86	86	84	43	53
1112	68.88	70.78	86	86	84	43	53
1113	69.2	70.87	86	86	84	43	53
1114	69.51	71.05	87	87	84	43	53
1115	69.87	71.07	87	87	85	43	53
1116	70.05	71.07	87	87	86	43	53
1117	70.16	70.98	87	87	87	43	53
1118	70.22	70.82	87	86	87	43	53
1119	70.18	70.52	87	86	87	43	53
1120	70	70.43	86	87	87	43	53
1121	69.9	70.28	87	87	86	43	53
1122	69.79	70.2	87	87	87	43	53
1123	69.69	70.03	87	87	87	43	53
1124	69.59	69.8	87	87	87	43	53
1125	69.41	69.49	88	88	87	42	53
1126	69.25	69.28	88	88	88	42	53
1127	69.06	69.12	88	88	89	42	53
1128	68.91	69	88	88	89	42	53
1129	68.66	68.87	88	88	88	42	53
1130	68.56	68.82	87	87	88	43	53
1131	68.37	68.84	87	87	88	43	53
1132	68.3	68.87	87	86	87	43	53
1133	68.26	68.93	86	86	85	43	53
1134	68.24	69.06	86	86	85	43	53
1135	68.31	69.16	86	86	85	43	53
1136	68.37	69.4	86	86	85	43	53
1137	68.49	69.64	86	86	86	43	53
1138	68.69	69.73	86	86	86	43	53
1139	68.83	69.83	86	86	86	43	52
1140	68.97	69.9	85	86	86	43	52
1141	68.98	70.01	86	85	85	43	52
1142	69.13	70.14	85	85	85	43	52
1143	69.32	70.26	85	85	84	43	52
1144	69.38	70.29	85	85	84	42	52
1145	69.44	70.28	85	85	84	42	52
1146	69.44	70.28	85	85	84	42	52
1147	69.47	70.27	85	85	84	42	52
1148	69.46	70.23	85	85	85	42	52
1149	69.44	70.03	85	85	85	43	53
1150	69.37	69.95	85	85	85	43	53
1151	69.33	69.95	84	84	85	43	54
1152	69.26	69.96	83	83	85	43	54
1153	69.21	69.99	82	82	84	43	54
1154	69.15	69.96	82	81	83	49	55
1155	69.2	69.97	81	80	81	49	55
1156	69.25	70	80	78	77	49	55
1157	69.31	70.08	77	77	72	49	56
1158	69.34	70.12	76	76	70	49	56
1159	69.46	70.26	75	75	69	52	56
1160	69.8	70.44	74	74	68	52	57
1161	70.28	70.64	73	73	67	52	57
1162	70.52	70.59	72	72	66	52	57
1163	70.55	70.55	71	71	65	52	58
1164	70.49	70.55	70	69	65	55	58
1165	70.42	70.47	69	69	65	55	58
1166	70.37	70.38	69	69	65	55	58
1167	70.37	70.45	69	69	65	55	58
1168	70.37	70.71	69	69	65	55	58
1169	70.37	71.5	69	70	66	58	58
1170	70.41	74.14	69	70	67	58	58
1171	70.54	78.3	69	69	69	58	58
1172	70.87	82.7	68	68	69	58	58
1173	72.12	86.32	68	68	69	61	58
1174	77.43	86.32	67	68	69	61	58
1175	82.43	87.27	67	68	68	61	59
1176	86.61	87.36	66	66	68	61	59
1177	89.77	88.88	65	65	67	61	58
1178	91.99	91.16	65	65	65	61	58
1179	93.83	93.52	65	65	63	61	59
1180	95.48	95.58	65	65	63	61	59
1181	96.66	96.95	65	65	63	61	59
1182	97.48	97.8	65	65	63	61	59
1183	98.06	98.41	65	65	64	61	59
1184	98.48	98.91	65	65	65	61	59
1185	98.8	99.16	65	65	65	61	60
1186	99.07	99.33	65	64	65	61	60
1187	99.28	99.46	64	64	64	61	60
1188	99.43	99.55	64	63	64	63	60
1189	99.54	99.61	63	63	63	63	60
1190	99.62	99.67	63	63	61	63	61
1191	99.68	99.7	63	62	61	63	61
1192	99.72	99.72	62	62	61	63	61
1193	99.75	99.72	62	62	61	64	61
1194	99.74	99.52	62	62	61	64	61
1195	99.74	99.45	62	62	61	64	61
1196	99.75	99.44	62	62	61	64	61
1197	99.76	99.45	62	62	61	64	61
1198	99.76	99.49	62	62	62	65	61
1199	99.76	99.53	63	63	62	65	62
1200	99.75	99.57	63	63	62	65	62
1201	99.74	99.59	64	64	62	65	62
1202	99.73	99.62	64	64	63	66	62
1203	99.72	99.61	64	64	65	66	62
1204	99.69	99.59	64	64	65	66	62
1205	99.67	99.62	64	65	65	66	62
1206	99.65	99.63	65	65	65	66	62
1207	99.65	99.63	65	65	65	66	62
1208	99.64	99.62	65	65	65	66	63
1209	99.64	99.62	65	65	65	66	63
1210	99.65	99.62	65	65	66	66	63
1211	99.66	99.64	64	65	66	66	63
1212	99.67	99.65	64	64	66	66	64
1213	99.67	99.64	64	64	65	66	64
1214	99.67	99.63	63	63	65	66	64
1215	99.68	99.64	62	63	64	66	64
1216	99.72	99.76	62	62	62	66	64
1217	99.73	99.74	61	61	59	66	64
1218	99.73	99.64	61	61	58	66	64
1219	99.74	99.65	61	61	58	66	64
1220	99.75	99.65	61	61	58	66	64
1221	99.79	99.68	60	60	58	66	64
1222	99.81	99.7	60	60	59	67	65
1223	99.82	99.72	61	61	60	67	65
1224	99.83	99.73	60	60	60	67	65
1225	99.83	99.72	60	60	60	67	65
1226	99.82	99.72	60	59	60	67	66
1227	99.8	99.71	59	59	60	68	66
1228	99.78	99.68	59	59	59	68	66
1229	99.74	99.66	59	59	58	68	66
1230	99.73	99.75	59	59	58	68	66
1231	99.73	99.68	59	59	58	68	66
1232	99.69	99.63	59	59	58	68	66
1233	99.67	99.61	59	59	58	68	66
1234	99.66	99.6	59	59	58	68	66
1235	99.67	99.61	59	59	59	68	66
1236	99.7	99.61	59	60	59	68	67
1237	99.71	99.6	60	60	60	68	67
1238	99.69	99.57	60	61	62	68	67
1239	99.68	99.53	61	60	62	68	67
1240	99.66	99.49	60	60	62	68	67
1241	99.64	99.46	60	60	62	69	67
1242	99.64	99.41	60	60	61	69	66
1243	99.6	99.38	60	60	60	69	66
1244	99.61	99.4	60	60	60	69	65
1245	99.63	99.44	60	60	60	69	65
1246	99.65	99.41	60	60	59	68	65
1247	99.64	99.42	60	60	60	68	65
1248	99.66	99.49	60	60	59	68	65
1249	99.69	99.52	60	59	59	68	65
1250	99.72	99.55	59	59	59	68	65
1251	99.75	99.57	59	60	59	69	65
1252	99.76	99.57	60	60	59	69	65
1253	99.77	99.58	60	60	59	69	65
1254	99.79	99.59	60	60	59	69	66
1255	99.81	99.6	60	60	60	69	66
1256	99.8	99.59	60	60	60	69	66
1257	99.79	99.56	60	60	60	69	66
1258	99.77	99.53	60	60	60	69	66
1259	99.73	99.51	60	59	60	69	66
1260	99.73	99.51	59	59	59	69	66
1261	99.75	99.51	59	59	58	69	66
1262	99.75	99.51	59	59	58	69	66
1263	99.74	99.53	59	59	58	69	66
1264	99.76	99.58	58	58	58	69	66
1265	99.74	99.6	58	58	58	68	66
1266	99.75	99.63	58	58	58	68	66
1267	99.79	99.67	58	58	58	68	66
1268	99.8	99.66	58	58	58	68	66
1269	99.83	99.65	58	58	58	68	66
1270	99.81	99.59	58	58	58	69	66
1271	99.82	99.59	58	58	58	69	67
1272	99.83	99.56	58	58	58	69	66
1273	99.82	99.55	58	58	58	69	66
1274	99.8	99.53	57	57	58	69	66
1275	99.79	99.51	57	57	58	69	66
1276	99.76	99.47	57	57	57	69	66
1277	99.54	99.54	57	57	56	69	67
1278	99.36	99.57	57	57	56	69	67
1279	99.26	99.55	57	57	56	70	67
1280	99.17	99.51	57	57	56	70	67
1281	99.12	99.46	57	57	56	70	67
1282	99.16	99.41	58	57	56	70	67
1283	99.2	99.36	57	57	57	70	67
1284	99.22	99.3	57	57	57	70	67
1285	99.24	99.23	57	57	57	70	67
1286	99.24	99.2	58	57	57	70	67
1287	99.27	99.19	57	57	57	70	67
1288	99.32	99.24	57	57	57	70	67
1289	99.35	99.27	57	57	57	69	67
1290	99.38	99.3	57	57	57	69	67
1291	99.51	99.28	57	58	57	69	67
1292	99.5	99.29	57	57	57	69	67
1293	99.55	99.35	56	57	57	69	68
1294	99.61	99.4	57	57	56	70	68
1295	99.58	99.42	57	57	56	70	68
1296	99.61	99.44	57	57	56	70	68
1297	99.62	99.48	57	57	57	70	68
1298	99.62	99.48	57	57	57	70	68
1299	99.61	99.46	57	57	57	70	68
1300	99.6	99.43	57	57	58	70	69
1301	99.58	99.4	57	57	58	70	69
1302	99.56	99.32	57	57	58	70	69
1303	99.51	99.17	56	56	57	70	69
1304	99.44	99.16	56	56	57	71	69
1305	99.4	99.11	56	55	56	71	69
1306	99.39	99.11	55	55	54	71	69
1307	99.36	99.11	55	55	54	71	69
1308	99.38	99.14	56	56	54	70	69
1309	99.44	99.21	56	56	54	70	69
1310	99.46	99.25	56	56	54	70	69
1311	99.38	99.06	55	55	55	70	69
1312	99.34	98.97	55	56	55	70	69
1313	99.35	98.95	56	56	56	70	69
1314	99.37	98.98	56	56	56	70	69
1315	99.39	99.03	55	55	56	70	69
1316	99.42	99.01	56	56	56	70	69
1317	99.42	99.03	56	56	56	70	69
1318	99.43	99.07	56	56	56	70	69
1319	99.47	99.12	55	55	55	70	69
1320	99.49	99.17	55	55	55	70	69
1321	99.52	99.21	56	56	55	70	70
1322	99.54	99.22	56	56	55	70	70
1323	99.59	99.26	56	56	55	71	70
1324	99.63	99.28	56	57	56	71	71
1325	99.65	99.28	57	57	57	71	71
1326	99.66	99.26	57	57	59	71	72
1327	99.66	99.26	57	58	59	71	72
1328	99.67	99.28	58	58	59	72	72
1329	99.68	99.29	58	58	59	72	72
1330	99.68	99.29	58	58	59	72	72
1331	99.69	99.3	58	59	59	72	72
1332	99.71	99.33	59	59	60	72	72
1333	99.73	99.38	59	59	60	73	72
1334	99.73	99.41	59	59	60	73	78
1335	99.73	99.42	59	59	60	73	78
1336	99.73	99.42	59	59	59	73	85
1337	99.74	99.44	59	59	59	73	87
1338	99.74	99.47	59	58	59	73	87
1339	99.74	99.5	58	59	58	73	87
1340	99.75	99.51	59	59	57	73	87
1341	99.75	99.51	59	59	57	73	86
1342	99.75	99.54	59	59	58	74	86
1343	99.75	99.55	59	59	58	74	86
1344	99.74	99.57	58	58	58	74	85
1345	99.73	99.55	58	58	58	74	85
1346	99.7	99.54	58	58	58	74	85
1347	99.65	99.51	58	58	58	73	84
1348	99.63	99.53	58	57	57	73	84
1349	99.61	99.52	57	57	57	73	84
1350	99.59	99.49	57	57	56	73	84
1351	99.56	99.44	57	57	57	73	84
1352	99.56	99.43	57	57	57	73	84
1353	99.55	99.41	57	57	57	73	84
1354	99.54	99.37	57	57	56	73	84
1355	99.52	99.33	57	57	56	73	84
1356	99.52	99.32	57	57	56	73	84
1357	99.52	99.33	57	56	56	73	85
1358	99.52	99.32	56	57	56	73	85
1359	99.52	99.31	56	56	55	73	84
1360	99.5	99.33	56	56	56	73	84
1361	99.5	99.37	56	56	56	73	84
1362	99.53	99.38	56	56	56	73	83
1363	99.55	99.39	56	56	56	73	82
1364	99.56	99.43	57	57	57	73	82
1365	99.59	99.47	57	57	58	73	82
1366	99.73	99.54	57	57	58	73	83
1367	99.7	99.49	57	57	58	73	83
1368	99.63	99.41	57	57	58	73	83
1369	99.54	99.29	57	57	58	73	83
1370	99.44	99.19	57	57	58	73	82
1371	99.33	99.06	57	57	58	73	82
1372	99.2	98.91	58	58	58	73	81
1373	99.07	98.77	58	58	58	73	79
1374	99.01	98.73	58	58	58	73	79
1375	98.96	98.7	58	58	59	73	78
1376	98.94	98.69	58	58	59	73	78
1377	98.95	98.7	59	58	59	73	77
1378	99.01	98.77	58	58	59	73	77
1379	99.08	98.84	58	58	59	73	76
1380	99.12	98.9	58	58	58	73	75
1381	99.16	98.95	59	58	58	73	75
1382	99.21	99	59	58	58	73	75
1383	99.28	99.05	58	58	59	73	75
1384	99.32	99.08	58	58	59	73	75
1385	99.33	99.1	58	59	59	73	74
1386	99.33	99.11	59	59	59	73	74
1387	99.36	99.14	59	59	60	73	74
1388	99.38	99.15	59	59	60	73	74
1389	99.34	99.05	59	60	61	73	73
1390	99.27	98.93	60	60	61	73	73
1391	99.16	98.78	60	60	61	73	73
1392	99.05	98.59	60	60	61	73	73
1393	98.93	98.4	60	60	61	73	72
1394	98.86	98.29	60	59	61	73	72
1395	98.93	98.34	60	59	61	73	73
1396	99.01	98.48	59	58	60	73	72
1397	99.07	98.64	59	59	59	73	72
1398	99.19	98.77	59	58	57	73	72
1399	99.29	98.94	58	58	57	73	72
1400	99.4	99.04	58	58	57	72	72
1401	99.48	99.1	57	57	57	72	73
1402	99.54	99.14	57	57	57	72	72
1403	99.59	99.21	57	57	56	72	72
1404	99.63	99.29	57	57	55	72	72
1405	99.67	99.36	56	56	55	72	73
1406	99.69	99.41	56	56	55	72	72
1407	99.7	99.45	56	56	55	72	72
1408	99.73	99.5	56	55	54	72	72
1409	99.73	99.54	55	55	54	72	72
1410	99.73	99.56	55	55	54	72	72
1411	99.75	99.57	55	55	54	72	72
1412	99.75	99.59	55	55	54	72	72
1413	99.76	99.6	54	54	53	72	72
1414	99.85	99.5	54	54	53	73	72
1415	99.84	99.48	55	54	53	73	71
1416	99.81	99.49	54	54	54	73	71
1417	99.8	99.52	54	54	54	73	71
1418	99.73	99.41	54	54	54	73	71
1419	99.71	99.38	54	55	54	73	71
1420	99.67	99.37	55	54	54	73	71
1421	99.62	99.36	54	54	54	73	71
1422	99.58	99.32	54	54	54	73	71
1423	99.52	99.3	54	54	54	73	71
1424	99.47	99.27	54	54	54	72	71
1425	99.43	99.25	54	54	54	72	70
1426	99.4	99.2	54	54	54	72	70
1427	99.37	99.25	54	54	54	72	70
1428	99.34	99.25	54	54	54	72	70
1429	99.35	99.27	54	54	54	72	70
1430	99.41	99.33	54	54	54	72	70
1431	99.47	99.37	53	53	54	72	70
1432	99.47	99.4	54	54	54	72	70
1433	99.44	99.4	54	54	54	72	70
1434	99.41	99.36	54	54	54	72	70
1435	99.42	99.33	54	54	54	72	70
1436	99.39	99.26	54	54	54	72	70
1437	99.35	99.15	54	54	54	72	70
1438	99.27	98.98	54	54	54	72	70
1439	99.22	98.85	54	54	54	72	70
1440	99.22	98.8	54	54	54	72	70
1441	99.19	98.81	54	54	54	72	70
1442	99.19	98.82	54	54	54	72	70
1443	99.22	98.87	54	54	54	72	70
1444	99.26	98.94	54	54	54	72	70
1445	99.33	99.04	54	54	54	72	70
1446	99.38	99.13	54	54	54	72	70
1447	99.39	99.17	54	54	54	72	70
1448	99.4	99.21	54	54	54	72	70
1449	99.46	99.4	54	54	55	72	70
1450	99.53	99.49	54	54	55	72	70
1451	99.55	99.52	54	54	54	72	70
1452	99.56	99.49	54	54	54	72	70
1453	99.61	99.53	54	54	54	72	70
1454	99.63	99.54	54	54	54	72	71
1455	99.65	99.53	54	54	55	72	71
1456	99.63	99.51	55	55	55	72	71
1457	99.61	99.46	55	55	56	72	71
1458	99.59	99.39	55	55	56	73	71
1459	99.55	99.31	55	55	56	73	71
1460	99.49	99.19	55	55	56	73	72
1461	99.47	99.06	55	55	55	73	72
1462	99.36	98.98	55	55	55	73	72
1463	99.28	98.98	55	55	55	73	71
1464	99.28	98.94	55	55	55	73	71
1465	99.27	98.99	55	55	55	73	71
1466	99.28	98.98	55	55	55	73	71
1467	99.32	98.96	55	55	55	72	71
1468	99.39	99.03	55	55	55	72	71
1469	99.4	99.05	55	55	55	72	71
1470	99.4	99.03	55	55	56	72	71
1471	99.37	98.98	55	55	55	72	71
1472	99.36	98.97	55	55	55	72	71
1473	99.39	98.96	54	55	55	72	71
1474	99.41	98.97	54	54	55	72	71
1475	99.43	98.97	55	55	54	72	71
1476	99.43	99.01	55	55	54	72	71
1477	99.49	99.1	55	55	54	72	71
1478	99.53	99.14	55	55	54	72	71
1479	99.55	99.16	55	56	55	72	71
1480	99.56	99.15	56	56	56	72	70
1481	99.56	99.13	55	56	56	72	70
1482	99.56	99.12	55	55	56	73	70
1483	99.56	99.11	55	55	56	73	70
1484	99.54	99.12	55	55	56	73	70
1485	99.55	99.08	55	55	55	73	70
1486	99.52	99.1	55	55	54	73	70
1487	99.55	99.13	54	54	54	72	70
1488	99.59	99.18	54	54	53	72	70
1489	99.62	99.24	55	55	54	72	70
1490	99.64	99.04	55	55	54	72	71
1491	99.67	99.05	55	55	54	72	71
1492	99.7	99.13	54	54	54	72	71
1493	99.73	99.2	54	55	55	72	71
1494	99.74	99.25	55	55	55	72	71
1495	99.74	99.32	55	55	56	72	71
1496	99.75	99.36	55	55	57	73	71
1497	99.73	99.37	55	55	57	73	71
1498	99.72	99.36	55	55	57	73	71
1499	99.71	99.28	55	55	57	73	71
1500	99.66	99.28	55	55	56	73	71
1501	99.61	99.27	54	54	55	73	71
1502	99.59	99.25	54	54	54	73	71
1503	99.56	99.25	54	54	54	73	71
1504	99.54	99.26	54	55	54	73	71
1505	99.56	99.34	55	54	54	73	71
1506	99.57	99.35	54	54	54	73	71
1507	99.58	99.36	54	55	55	73	71
1508	99.58	99.35	55	55	55	73	71
1509	99.56	99.44	55	55	55	73	71
1510	99.41	99.52	54	56	55	73	72
1511	99.29	99.54	54	56	55	73	71
1512	99.24	99.57	54	56	54	73	71
1513	99.23	99.57	54	56	54	73	71
1514	99.36	99.5	54	55	54	73	71
1515	99.4	99.43	54	55	54	73	71
1516	99.45	99.44	54	55	54	72	71
1517	99.46	99.37	54	55	54	72	71
1518	99.47	99.34	54	55	54	72	71
1519	99.54	99.31	54	55	54	72	71
1520	99.57	99.31	54	55	54	73	72
1521	99.58	99.32	54	55	54	73	72
1522	99.6	99.32	55	55	54	73	72
1523	99.61	99.3	55	55	54	73	72
1524	99.62	99.27	55	55	54	73	72
1525	99.6	99.25	55	54	55	73	72
1526	99.59	99.21	54	54	55	73	72
1527	99.58	99.16	54	55	55	73	71
1528	99.58	99.14	54	54	54	73	71
1529	99.55	99.18	54	54	54	73	71
1530	99.58	99.2	54	54	54	72	71
1531	99.6	99.25	54	54	54	72	71
1532	99.61	99.29	54	55	54	72	71
1533	99.61	99.3	54	55	54	72	71
1534	99.63	99.35	54	54	55	72	71
1535	99.65	99.39	54	55	55	72	71
1536	99.65	99.4	54	55	55	72	71
1537	99.7	99.45	55	55	55	72	71
1538	99.7	99.49	55	55	55	72	71
1539	99.71	99.48	55	55	56	72	71
1540	99.71	99.43	55	55	56	72	71
1541	99.69	99.37	55	55	55	72	71
1542	99.72	99.37	55	55	55	72	72
1543	99.91	99.3	54	54	55	72	72
1544	99.92	99.23	54	54	54	72	72
1545	99.88	99.19	55	55	54	72	71
1546	99.8	99.18	55	55	54	72	71
1547	99.75	99.25	55	55	54	72	71
1548	99.71	99.3	55	55	54	72	71
1549	99.68	99.32	55	55	55	73	72
1550	99.66	99.33	55	55	56	73	72
1551	99.64	99.33	55	55	56	73	72
1552	99.62	99.33	55	55	56	73	72
1553	99.61	99.32	55	55	56	73	72
1554	99.61	99.3	55	55	56	73	72
1555	99.6	99.32	55	55	55	73	72
1556	99.66	99.35	55	55	55	73	72
1557	99.68	99.4	55	55	55	73	72
1558	99.7	99.43	55	55	55	73	72
1559	99.71	99.46	55	55	55	73	72
1560	99.73	99.49	55	55	55	73	72
1561	99.75	99.51	55	55	56	73	72
1562	99.75	99.52	55	56	56	73	72
1563	99.75	99.5	56	56	56	73	72
1564	99.72	99.49	56	56	56	74	72
1565	99.68	99.48	56	56	56	74	72
1566	99.65	99.47	56	56	56	74	72
1567	99.62	99.43	56	56	56	74	72
1568	99.56	99.37	56	56	56	74	72
1569	99.49	99.34	56	56	56	73	72
1570	99.45	99.34	56	56	56	73	72
1571	99.41	99.3	56	56	56	73	72
1572	99.39	99.3	56	56	57	73	72
1573	99.4	99.26	57	57	57	73	72
1574	99.42	99.3	58	58	57	73	72
1575	99.46	99.33	58	58	58	73	72
1576	99.47	99.33	58	58	60	73	72
1577	99.47	99.29	58	58	60	73	72
1578	99.45	99.24	58	58	60	73	72
1579	99.43	99.2	57	57	60	73	71
1580	99.42	99.18	57	57	59	73	71
1581	99.41	99.13	57	57	58	73	71
1582	99.43	99.15	57	56	56	73	72
1583	99.47	99.21	56	56	56	73	72
1584	99.48	99.27	56	56	55	73	72
1585	99.54	99.32	55	55	54	73	72
1586	99.56	99.33	55	55	54	73	72
1587	99.58	99.37	55	55	54	73	72
1588	99.62	99.43	55	55	54	74	72
1589	99.63	99.46	54	54	54	74	72
1590	99.64	99.47	55	55	54	74	72
1591	99.64	99.46	55	55	54	74	71
1592	99.63	99.45	55	55	54	74	72
1593	99.63	99.44	55	55	54	74	72
1594	99.61	99.4	55	55	55	74	72
1595	99.57	99.32	55	55	56	74	72
1596	99.5	99.27	55	55	56	74	71
1597	99.45	99.21	55	55	56	74	71
1598	99.41	99.22	54	54	55	74	71
1599	99.4	99.21	54	54	55	74	71
1600	99.4	99.19	54	54	55	74	71
1601	99.41	99.25	54	54	54	74	71
1602	99.47	99.31	54	54	54	74	71
1603	99.42	99.26	54	54	54	74	71
1604	99.42	99.28	54	54	54	74	71
1605	99.46	99.33	54	54	54	74	72
1606	99.5	99.38	54	54	54	74	72
1607	99.54	99.39	54	54	54	74	72
1608	99.53	99.38	54	54	55	74	72
1609	99.5	99.3	55	55	55	74	72
1610	99.45	99.2	55	55	55	74	72
1611	99.42	99.19	54	54	55	74	71
1612	99.34	99.05	54	55	55	74	71
1613	99.29	99.01	55	55	55	74	71
1614	99.27	99.01	55	55	55	74	71
1615	99.3	99.06	55	55	55	74	71
1616	99.31	99.12	55	55	55	74	71
1617	99.31	99.14	55	55	55	73	71
1618	99.36	99.13	55	55	56	73	71
1619	99.35	99.12	56	56	56	73	72
1620	99.35	99.08	56	56	56	73	72
1621	99.33	99.1	55	55	56	73	72
1622	99.33	99.05	55	55	56	73	72
1623	99.28	98.99	55	55	56	73	72
1624	99.25	98.94	56	56	55	73	72
1625	99.27	98.97	55	55	56	73	72
1626	99.28	98.98	55	55	56	73	72
1627	99.28	98.98	55	55	56	73	72
1628	99.26	98.95	56	56	55	73	71
1629	99.27	98.95	56	56	56	73	71
1630	99.27	99	56	55	56	73	71
1631	99.27	99	55	55	56	73	71
1632	99.3	99.03	56	56	56	73	72
1633	99.3	99.06	56	56	56	73	72
1634	99.33	99.05	56	56	56	73	72
1635	99.34	99.09	56	55	56	73	72
1636	99.29	99.22	56	56	56	73	72
1637	99.28	99.3	56	56	56	73	72
1638	99.22	99.33	56	56	56	73	71
1639	99.18	99.29	56	56	56	73	71
1640	99.14	99.13	56	56	56	73	71
1641	99.09	98.98	56	57	57	73	71
1642	99.03	98.84	57	57	57	73	70
1643	98.99	98.75	57	57	58	73	70
1644	98.99	98.67	57	56	58	73	70
1645	98.99	98.61	56	56	58	73	71
1646	98.98	98.6	56	57	58	73	71
1647	98.98	98.56	57	57	57	73	71
1648	98.97	98.56	57	57	57	73	71
1649	98.99	98.58	57	57	57	73	71
1650	98.99	98.52	57	57	57	73	71
1651	98.96	98.46	57	57	57	73	71
1652	98.93	98.4	58	58	57	73	71
1653	98.91	98.34	58	58	58	73	71
1654	98.87	98.29	57	57	58	73	71
1655	98.83	98.25	57	57	58	73	70
1656	98.79	98.17	58	58	58	73	70
1657	98.74	98.09	58	58	58	73	71
1658	98.71	98.08	58	58	58	73	71
1659	98.69	98.08	57	58	58	73	71
1660	98.69	98.1	58	58	58	72	71
1661	98.66	98.1	57	58	58	72	71
1662	98.64	98.07	57	57	57	72	71
1663	98.63	98.04	57	57	57	72	71
1664	98.64	98.01	57	57	57	72	71
1665	98.54	97.89	58	58	57	72	71
1666	98.4	97.82	58	57	58	72	71
1667	98.29	97.75	57	57	58	72	71
1668	98.22	97.69	57	57	58	72	71
1669	98.2	97.67	57	57	58	72	71
1670	98.1	97.56	57	58	58	72	71
1671	97.94	97.46	58	57	57	72	72
1672	97.81	97.36	57	57	57	72	72
1673	97.68	97.26	57	57	57	72	72
1674	97.67	97.15	57	57	57	72	72
1675	97.56	97.07	57	57	57	72	72
1676	97.4	97.03	56	56	56	72	72
1677	97.31	96.96	56	56	55	72	72
1678	97.25	96.94	56	56	55	72	72
1679	97.15	96.82	57	57	55	72	72
1680	97.09	96.84	57	57	55	72	72
1681	97.02	96.82	56	56	56	72	72
1682	96.94	96.75	56	56	56	72	72
1683	96.88	96.67	56	57	56	72	72
1684	96.78	96.58	57	57	56	71	72
1685	96.81	96.43	57	56	56	71	72
1686	96.83	96.3	56	56	56	71	71
1687	96.73	96.24	56	56	56	71	71
1688	96.68	96.22	56	56	56	71	71
1689	96.65	96.19	56	56	56	71	71
1690	96.6	96.15	56	57	56	71	71
1691	96.57	96.08	57	58	56	71	71
1692	96.52	96	58	59	56	71	71
1693	96.45	95.9	59	59	57	71	71
1694	96.33	95.81	59	59	58	71	71
1695	96.25	95.69	59	59	60	71	71
1696	96.12	95.48	59	59	60	71	71
1697	95.97	95.26	59	59	60	71	70
1698	95.71	95.16	58	58	60	71	70
1699	95.63	95.16	58	58	59	70	71
1700	95.56	95.08	58	58	59	70	70
1701	95.47	94.99	58	58	58	70	70
1702	95.4	94.97	59	59	58	70	70
1703	95.37	94.92	58	58	58	70	70
1704	95.34	94.91	58	58	58	70	70
1705	95.27	94.79	58	59	59	70	70
1706	95.24	94.73	59	59	59	70	71
1707	95.1	94.6	59	59	59	70	70
1708	94.96	94.48	58	58	59	70	70
1709	94.88	94.4	59	59	59	70	70
1710	94.76	94.31	59	59	59	70	70
1711	94.59	94.13	59	59	59	70	70
1712	94.43	94	59	59	59	70	70
1713	94.26	93.84	59	59	60	70	70
1714	94.12	93.69	59	59	60	70	69
1715	93.93	93.47	59	59	59	70	69
1716	93.64	93.34	59	59	59	70	69
1717	93.45	93.2	59	59	59	70	69
1718	93.29	93.08	59	59	58	69	69
1719	93.11	92.95	59	59	58	69	68
1720	92.94	92.81	60	60	58	69	68
1721	92.83	92.71	60	60	59	69	68
1722	92.72	92.63	60	60	59	69	68
1723	92.61	92.52	60	60	60	69	68
1724	92.53	92.42	60	60	61	69	68
1725	92.43	92.29	60	60	61	69	68
1726	92.33	92.19	60	60	61	69	68
1727	92.24	92.07	60	60	61	69	67
1728	92.1	91.95	61	61	61	68	67
1729	91.93	91.81	61	61	61	68	67
1730	91.76	91.64	61	61	61	68	67
1731	91.62	91.26	60	60	61	68	67
1732	91.47	91.05	60	60	61	68	67
1733	91.33	90.91	60	59	61	67	67
1734	91.22	90.82	61	60	61	67	67
1735	91.12	90.69	61	60	61	67	67
1736	90.99	90.46	61	60	61	67	67
1737	90.85	90.28	61	61	61	66	67
1738	90.7	90.05	62	61	62	66	67
1739	90.5	89.86	62	61	63	66	67
1740	90.3	89.67	62	61	63	66	66
1741	90.14	89.53	61	61	62	66	66
1742	89.98	89.41	61	61	62	66	66
1743	89.85	89.28	61	61	62	66	66
1744	89.71	89.2	61	61	61	66	66
1745	89.61	89.14	61	61	61	66	66
1746	89.52	89.04	61	61	61	66	66
1747	89.45	88.9	61	62	61	66	66
1748	89.4	88.76	62	62	62	66	66
1749	89.17	88.51	62	62	63	66	65
1750	88.95	88.51	62	62	63	66	65
1751	88.75	88.03	62	62	63	66	65
1752	88.47	87.84	62	62	63	65	65
1753	88.23	87.64	62	62	62	65	65
1754	87.99	87.44	63	63	63	65	65
1755	87.76	87.29	63	63	63	65	65
1756	87.55	87.09	64	64	63	65	65
1757	87.34	86.87	64	64	63	65	65
1758	87.13	86.71	64	64	64	65	65
1759	86.93	86.53	64	64	65	65	65
1760	86.74	86.34	64	64	65	65	65
1761	86.52	86.19	64	64	64	64	64
1762	86.39	86.04	64	64	64	64	64
1763	86.3	85.94	64	65	65	64	64
1764	86.15	85.77	65	65	65	64	64
1765	85.98	85.52	65	65	65	64	64
1766	85.83	85.3	65	65	66	64	64
1767	85.61	85.08	65	65	67	64	64
1768	85.36	84.82	66	66	67	64	64
1769	85.03	84.48	66	66	67	64	64
1770	84.77	84.32	66	66	67	64	64
1771	84.57	84.2	67	66	68	63	63
1772	84.35	84.08	66	66	68	63	63
1773	84.14	83.93	66	66	68	63	63
1774	83.95	83.76	66	66	68	63	63
1775	83.81	83.62	66	66	67	63	63
1776	83.71	83.52	66	66	66	62	63
1777	83.58	83.41	66	66	66	62	63
1778	83.42	83.24	66	66	66	62	63
1779	83.28	83.2	66	66	65	62	63
1780	83.16	83.2	65	66	65	62	63
1781	83.09	83.18	65	65	64	62	63
1782	83.04	83.16	65	66	64	62	63
1783	83.04	83.15	66	66	64	62	63
1784	83.04	83.2	67	67	64	62	63
1785	83.04	83.19	67	67	65	62	63
1786	83.03	83.16	67	67	66	62	62
1787	82.98	83.11	67	67	68	62	62
1788	82.92	83.11	67	67	68	62	62
1789	82.86	83.05	67	67	68	62	62
1790	82.79	83	67	67	67	61	62
1791	82.72	82.96	67	67	67	61	62
1792	82.67	82.87	67	67	67	61	62
1793	82.62	82.68	67	67	67	61	62
1794	82.5	82.5	67	67	67	61	62
1795	82.35	82.34	68	68	67	61	62
1796	82.22	82.22	68	68	68	61	62
1797	82.1	82	68	68	69	61	61
1798	81.86	81.85	68	68	69	61	61
1799	81.71	81.73	68	68	70	61	61
1800	81.71	81.61	68	68	70	59	61
1801	81.46	81.45	69	69	70	59	60
1802	81.32	81.28	69	69	69	59	60
1803	81.13	81.17	69	69	70	59	60
1804	80.96	80.9	69	69	69	59	60
1805	80.79	80.63	69	69	69	58	60
1806	80.5	80.29	69	69	69	58	60
1807	80.18	79.87	69	69	69	58	60
1808	79.83	79.45	70	70	69	58	61
1809	79.55	79.27	70	70	70	58	60
1810	79.27	79.27	70	70	70	59	60
1811	79.05	79.01	70	70	71	59	60
1812	78.87	78.88	70	70	71	59	60
1813	78.7	78.72	70	70	71	59	60
1814	78.54	78.72	70	70	71	59	60
1815	78.42	78.59	70	69	70	57	59
1816	78.3	78.53	69	69	69	57	59
1817	78.17	78.35	69	69	68	57	59
1818	78.09	78.35	69	69	68	57	59
1819	77.92	78.08	69	69	68	57	59
1820	77.75	77.89	69	69	68	57	59
1821	77.55	77.87	69	69	68	57	59
1822	77.45	77.85	69	70	68	57	59
1823	77.42	77.85	70	70	69	57	59
1824	77.43	77.88	71	71	71	57	59
1825	77.47	77.92	71	72	73	57	59
1826	77.51	77.78	72	72	74	57	59
1827	77.43	77.78	73	72	75	57	59
1828	77.3	77.31	72	72	75	57	59
1829	77.12	77.04	72	72	75	56	59
1830	76.86	76.76	72	72	75	56	58
1831	76.62	76.76	72	72	75	56	58
1832	76.2	76.45	72	72	74	56	58
1833	75.96	75.93	73	73	73	56	58
1834	75.74	75.73	73	74	74	55	57
1835	75.56	75.73	74	74	74	55	57
1836	75.29	75.56	74	74	74	55	57
1837	75.11	75.47	74	74	74	55	57
1838	74.98	75.32	75	75	75	55	57
1839	74.8	75.32	75	75	76	55	57
1840	74.62	75.23	75	75	76	55	57
1841	74.51	75.2	75	75	76	55	57
1842	74.48	75.12	75	76	76	55	57
1843	74.37	75.12	76	76	76	55	56
1844	74.33	74.99	76	76	77	53	56
1845	74.21	74.38	76	77	78	53	56
1846	74.07	74.15	77	77	78	53	56
1847	73.8	73.88	77	77	79	53	56
1848	73.51	73.88	77	77	79	54	56
1849	73.21	73.38	77	77	79	54	56
1850	72.93	73.65	77	77	78	54	56
1851	72.73	73.54	77	77	78	54	56
1852	72.64	73.54	77	77	77	54	56
1853	72.69	73.55	77	77	76	52	56
1854	72.73	73.58	76	76	75	52	56
1855	72.76	73.58	76	76	75	52	56
1856	72.81	73.59	77	76	76	52	56
1857	72.81	73.59	77	76	76	52	56
1858	72.81	73.56	77	78	76	52	56
1859	72.79	73.47	78	78	77	52	56
1860	72.73	73.39	78	78	79	52	56
1861	72.69	73.39	78	78	80	52	56
1862	72.6	73.24	78	78	80	52	56
1863	72.52	73.17	78	78	80	52	56
1864	72.44	73.17	78	78	80	52	55
1865	72.33	72.9	79	79	80	52	55
1866	71.97	72.25	79	79	80	52	55
1867	71.71	72.17	79	80	80	52	55
1868	71.63	72.17	80	80	80	52	55
1869	71.53	72.12	80	80	80	51	55
1870	71.47	72.07	80	80	81	51	55
1871	71.4	72.08	80	80	81	51	55
1872	71.38	72.08	80	80	81	50	55
1873	71.38	72.12	80	80	81	50	55
1874	71.3	72	80	80	81	50	55
1875	71.21	71.85	80	80	80	50	55
1876	71.05	71.85	80	80	80	50	55
1877	70.86	71.87	80	80	80	50	55
1878	70.78	71.78	80	80	80	50	55
1879	70.8	71.66	80	80	80	50	55
1880	70.84	71.62	80	80	81	50	55
1881	70.87	71.62	80	80	80	50	55
1882	70.87	71.67	80	80	80	49	55
1883	70.8	71.43	80	80	80	49	55
1884	70.72	71.4	80	80	80	49	55
1885	70.64	71.4	80	80	80	49	55
1886	70.53	71.25	80	80	81	49	55
1887	70.36	71.1	81	80	81	49	55
1888	70.31	70.81	80	80	80	49	55
1889	70.39	70.9	80	80	80	49	55
1890	70.32	70.9	80	80	80	49	54
1891	70.23	70.86	80	81	80	49	54
1892	70.09	70.68	81	81	80	49	55
1893	70.05	70.68	81	81	80	49	54
1894	70.06	70.71	82	81	81	49	54
1895	70	70.79	82	82	81	49	54
1896	70.01	70.71	82	82	82	49	54
1897	69.97	70.71	82	82	83	48	54
1898	69.88	70.61	82	82	82	48	54
1899	69.8	70.54	82	82	82	48	54
1900	69.71	70.55	82	82	82	48	54
1901	69.63	70.55	82	82	82	47	54
1902	69.59	70.57	81	81	81	47	54
1903	69.53	70.17	81	81	81	47	54
1904	69.41	69.98	82	82	81	47	54
1905	69.34	69.98	82	82	81	47	54
1906	69.17	69.86	83	82	81	47	54
1907	69.06	69.76	83	83	82	47	54
1908	68.68	70.18	83	83	83	47	54
1909	68.64	70.18	83	83	84	47	54
1910	68.62	70.21	83	83	84	47	54
1911	68.68	70.19	83	83	84	47	54
1912	68.77	70.37	83	83	84	47	54
1913	69.04	70.37	84	84	84	47	54
1914	69.13	70.37	84	84	84	47	54
1915	69.22	70.4	85	85	84	47	54
1916	69.25	70.43	86	86	84	47	54
1917	69.31	70.43	86	86	85	47	54
1918	69.29	70.37	86	86	86	47	54
1919	69.26	70.31	85	85	86	47	54
1920	69.15	70.43	85	85	86	47	54
1921	69.1	70.43	85	85	86	47	54
1922	69.12	70.43	84	85	86	47	53
1923	69.13	70.37	84	84	85	47	54
1924	69.13	70.14	84	84	84	47	54
1925	69.07	70.14	84	84	83	46	54
1926	68.97	70.06	84	84	83	46	54
1927	68.87	69.88	84	84	84	46	54
1928	68.75	69.7	84	84	84	46	54
1929	68.78	69.68	85	84	84	46	54
1930	68.85	69.7	84	85	85	46	54
1931	68.85	69.74	84	84	85	46	54
1932	68.93	69.85	84	84	85	46	55
1933	69.04	69.85	84	84	84	46	56
1934	69.07	69.84	84	84	84	46	56
1935	69.01	69.78	84	84	84	46	56
1936	69.07	70.04	84	83	83	46	56
1937	69.21	70.04	83	83	82	46	56
1938	69.22	69.99	83	83	81	46	56
1939	69.19	69.93	83	83	81	46	56
1940	69.24	70.03	83	83	81	46	56
1941	69.3	70.09	84	83	82	46	56
1942	69.34	70.11	85	84	82	46	56
1943	69.32	70.07	85	85	83	46	56
1944	69.32	70.03	85	85	85	46	56
1945	69.24	70.03	85	85	87	46	55
1946	69.17	70.09	85	85	87	46	55
1947	69.17	70.15	85	85	86	46	55
1948	69.19	70.24	85	85	86	46	55
1949	69.2	70.2	85	86	86	45	55
1950	69.16	70.2	86	86	86	45	55
1951	69.09	70.06	86	86	86	45	55
1952	68.9	69.56	86	86	86	45	55
1953	68.8	69.56	86	86	87	45	55
1954	68.65	69.2	86	85	87	44	55
1955	68.45	68.97	86	86	87	44	55
1956	68.13	68.91	86	86	87	44	55
1957	68.18	68.91	86	86	86	44	55
1958	68.33	69.12	87	86	86	44	55
1959	68.52	69.34	87	87	86	45	55
1960	68.6	69.48	88	87	86	45	55
1961	68.67	69.55	88	88	86	45	55
1962	68.65	69.6	88	87	87	45	55
1963	68.53	69.67	88	88	88	45	55
1964	68.55	69.8	88	89	88	44	55
1965	68.56	69.8	89	89	89	44	55
1966	68.57	69.75	90	90	91	44	55
1967	68.49	69.61	90	90	92	44	55
1968	68.38	69.46	90	90	93	44	54
1969	68.26	69.32	90	90	93	44	54
1970	68.13	69.17	91	91	93	44	54
1971	68.01	69.04	91	91	92	44	54
1972	67.92	68.76	90	90	92	44	54
1973	67.78	68.76	90	90	91	44	54
1974	67.7	68.65	90	90	89	44	54
1975	67.62	68.67	90	90	89	44	54
1976	67.63	68.76	89	89	88	44	54
1977	67.5	68.6	88	89	87	44	54
1978	67.52	68.64	88	88	87	44	54
1979	67.91	68.89	88	88	86	44	54
1980	68.25	69.09	88	88	86	44	54
1981	68.67	69.54	88	88	86	44	54
1982	68.88	69.89	88	88	87	44	54
1983	69.03	70.02	88	88	87	44	54
1984	69.1	70	88	88	88	44	54
1985	69.13	70.04	88	88	88	44	54
1986	69.11	70.05	88	88	88	44	54
1987	69.1	70.06	88	88	88	44	54
1988	69.03	69.98	87	88	88	44	54
1989	69.02	69.86	87	87	87	44	54
1990	68.85	69.73	87	87	87	44	54
1991	68.76	69.71	87	87	87	44	54
1992	68.72	69.69	87	87	87	44	54
1993	68.69	69.69	87	87	86	45	54
1994	68.67	69.7	86	86	86	45	53
1995	68.73	69.7	85	86	86	45	53
1996	68.89	69.79	85	85	85	45	53
1997	69.05	69.84	85	85	83	45	53
1998	69.13	70.02	85	85	83	45	53
1999	69.28	70.28	85	85	83	45	53
[truncated: 685 more rows]
